# Supplementary material
Source: publisher site journal article supplement (https://www.dovepress.com/article/305030)
Supplement: Supplementary file 1 [file get_supplementary_file.php]

| **Table S1** The commonly DECs in GSE101586 dataset | | |
| --- | --- | --- |
| circRNA | P.Value | logFC |
| hsa_circRNA_103809 | 0.001979 | 2.513804 |
| hsa_circRNA_102049 | 0.002602 | 2.654576 |
| hsa_circRNA_102051 | 0.007278 | 2.567267 |
| hsa_circRNA_104270 | 0.008187 | 2.450695 |
| hsa_circRNA_102619 | 0.023568 | 2.450922 |

| **Table S2** The commonly DECs in GSE101684 dataset. | | |
| --- | --- | --- |
| circRNA | P.Value | logFC |
| hsa_circRNA_104871 | 0.00000131 | 2.0831341 |
| hsa_circRNA_404458 | 0.00000134 | 2.8043785 |
| hsa_circRNA_080968 | 0.00000142 | 2.432045 |
| hsa_circRNA_404833 | 0.00000202 | 2.8629483 |
| hsa_circRNA_101833 | 0.00000754 | 2.8361072 |
| hsa_circRNA_406483 | 0.00000893 | 3.1781214 |
| hsa_circRNA_006349 | 0.00000974 | 2.4963739 |
| hsa_circRNA_008584 | 0.0000122 | 2.0936718 |
| hsa_circRNA_406826 | 0.0000159 | 2.4697833 |
| hsa_circRNA_400294 | 0.0000163 | 2.1549263 |
| hsa_circRNA_101555 | 0.0000196 | 2.3393781 |
| hsa_circRNA_001937 | 0.0000316 | 2.3404903 |
| hsa_circRNA_104640 | 0.0000395 | 2.5426969 |
| hsa_circRNA_103470 | 0.0000453 | 2.7319808 |
| hsa_circRNA_031968 | 0.0000775 | 2.3313121 |
| hsa_circRNA_000121 | 0.0000991 | 2.0589989 |
| hsa_circRNA_013480 | 0.000128 | -2.0451956 |
| hsa_circRNA_050649 | 0.000132 | 2.1493338 |
| hsa_circRNA_050648 | 0.00016 | 2.2386113 |
| hsa_circRNA_104172 | 0.000223 | 2.0564063 |
| hsa_circRNA_000317 | 0.000359 | -2.6111224 |
| hsa_circRNA_103809 | 0.000403 | 2.8466346 |
| hsa_circRNA_001640 | 0.000941 | -2.0733277 |
| hsa_circRNA_406083 | 0.00155 | 2.2740975 |
| hsa_circRNA_104327 | 0.00287 | 2.0339913 |
| hsa_circRNA_101748 | 0.00306 | 2.0026622 |
| hsa_circRNA_033628 | 0.00386 | 2.234732 |
| hsa_circRNA_089761 | 0.0091 | 2.2210161 |
| hsa_circRNA_406192 | 0.00956 | 2.3118448 |

| **Table S3** The commonly downregulated miRNAs in GSE135918 dataset. | | |
| --- | --- | --- |
| Human_miRNA | P.Value | logFC |
| hsa-miR-126-5p | 3.63E-08 | -6.7550476 |
| hsa-miR-195-5p | 0.000000576 | -5.7738294 |
| hsa-miR-130a-3p | 0.000000579 | -6.509528 |
| hsa-miR-30c-5p | 0.00000067 | -3.3423239 |
| hsa-miR-126-3p | 0.000000783 | -6.6164604 |
| hsa-miR-548t-3p | 0.000000882 | -3.3948867 |
| hsa-miR-548aa | 0.000000882 | -3.3948867 |
| hsa-miR-2964a-5p | 0.000000918 | -2.6858151 |
| hsa-miR-5003-5p | 0.00000116 | -2.7283193 |
| hsa-miR-33a-5p | 0.00000117 | -6.934414 |
| hsa-miR-20b-5p | 0.00000139 | -6.0270092 |
| hsa-miR-20a-5p | 0.00000146 | -7.8193023 |
| hsa-miR-30e-3p | 0.00000154 | -4.1477232 |
| hsa-miR-3591-3p | 0.00000159 | -2.617068 |
| hsa-miR-4252 | 0.00000188 | -2.8656955 |
| hsa-miR-4694-5p | 0.00000201 | -2.5151101 |
| hsa-miR-340-3p | 0.00000227 | -2.8224482 |
| hsa-miR-4536-3p | 0.00000251 | -4.4789811 |
| hsa-miR-10b-5p | 0.00000297 | -2.8767484 |
| hsa-miR-1297 | 0.00000305 | -4.1839992 |
| hsa-miR-5582-5p | 0.00000319 | -2.3910436 |
| hsa-miR-101-3p | 0.00000333 | -5.9727802 |
| hsa-miR-660-5p | 0.00000365 | -5.4923477 |
| hsa-miR-3064-3p | 0.00000388 | -2.4793252 |
| hsa-miR-99a-5p | 0.000004 | -3.2114699 |
| hsa-miR-106a-5p | 0.00000554 | -3.2817511 |
| hsa-miR-376a-5p | 0.00000679 | -2.9355221 |
| hsa-let-7a-5p | 0.0000072 | -3.5683386 |
| hsa-miR-199b-5p | 0.00000782 | -6.3717985 |
| hsa-miR-421 | 0.00000869 | -4.1933456 |
| hsa-miR-28-5p | 0.00000865 | -3.8392148 |
| hsa-miR-194-5p | 0.0000095 | -2.4871967 |
| hsa-miR-323b-3p | 0.0000103 | -3.4064625 |
| hsa-miR-30a-5p | 0.0000103 | -3.189635 |
| hsa-let-7g-5p | 0.0000117 | -3.9940086 |
| hsa-miR-3925-3p | 0.0000119 | -3.7614006 |
| hsa-miR-501-3p | 0.0000124 | -2.9529415 |
| hsa-miR-181c-5p | 0.0000136 | -4.2046864 |
| hsa-miR-26a-1-3p | 0.0000136 | -2.5341639 |
| hsa-miR-548v | 0.0000149 | -4.2614246 |
| hsa-miR-4500 | 0.0000151 | -2.7827709 |
| hsa-miR-23b-3p | 0.0000157 | -3.805345 |
| hsa-miR-4254 | 0.0000159 | -2.1670179 |
| hsa-miR-5689 | 0.0000164 | -2.4906056 |
| hsa-miR-16-5p | 0.0000187 | -5.1434694 |
| hsa-miR-374a-5p | 0.0000223 | -7.0316531 |
| hsa-miR-10a-5p | 0.0000197 | -2.9128291 |
| hsa-miR-22-5p | 0.0000227 | -2.0054171 |
| hsa-miR-15b-5p | 0.0000241 | -3.6829595 |
| hsa-miR-3680-5p | 0.0000246 | -2.3993566 |
| hsa-miR-4774-5p | 0.0000257 | -2.7668025 |
| hsa-miR-140-3p | 0.0000266 | -2.5130641 |
| hsa-miR-374b-3p | 0.0000268 | -2.423853 |
| hsa-miR-550b-3p | 0.0000304 | -1.8743628 |
| hsa-miR-30b-5p | 0.0000346 | -5.0830447 |
| hsa-miR-335-5p | 0.0000349 | -4.7214054 |
| hsa-miR-451a | 0.0000357 | -5.5013543 |
| hsa-miR-1224-3p | 0.0000367 | -2.4272225 |
| hsa-miR-141-5p | 0.000037 | -2.1717851 |
| hsa-miR-30a-3p | 0.0000385 | -5.5659977 |
| hsa-miR-1915-3p | 0.0000397 | -2.5403323 |
| hsa-miR-424-5p | 0.0000424 | -3.7572285 |
| hsa-miR-3121-5p | 0.0000448 | -2.0387336 |
| hsa-miR-5000-3p | 0.000045 | -3.5614098 |
| hsa-miR-4258 | 0.0000493 | -2.1603405 |
| hsa-miR-214-5p | 0.0000498 | -2.2887387 |
| hsa-miR-371a-3p | 0.0000527 | -2.4278003 |
| hsa-miR-382-3p | 0.000058 | -2.1741916 |
| hsa-miR-26a-2-3p | 0.0000597 | -2.2821927 |
| hsa-miR-548ap-3p | 0.0000724 | -4.98495 |
| hsa-miR-548t-3p | 0.0000724 | -4.98495 |
| hsa-miR-548aa | 0.0000724 | -4.98495 |
| hsa-miR-1470 | 0.0000654 | -2.5674825 |
| hsa-miR-3657 | 0.0000669 | -1.9282273 |
| hsa-miR-1255b-2-3p | 0.0000672 | -1.8858301 |
| hsa-miR-4517 | 0.0000676 | -2.7650009 |
| hsa-miR-511 | 0.0000707 | -2.5430912 |
| hsa-miR-15a-5p | 0.0000709 | -5.2724505 |
| hsa-miR-941 | 0.0000792 | -2.5611408 |
| hsa-miR-3607-5p | 0.0000798 | -3.3876311 |
| hsa-miR-3074-3p | 0.0000884 | -3.1030715 |
| hsa-miR-26a-5p | 0.0000815 | -4.6552395 |
| hsa-miR-3152-5p | 0.000083 | -1.9056476 |
| hsa-miR-30e-5p | 0.0000891 | -4.0174586 |
| hsa-miR-148b-5p | 0.00012 | -5.1591852 |
| hsa-miR-4292 | 0.0000983 | -2.2900753 |
| hsa-miR-4661-3p | 0.0000993 | -1.7025576 |
| hsa-miR-9-3p | 0.000103 | -2.2407194 |
| hsa-miR-3941 | 0.000108 | -1.7323867 |
| hsa-miR-5196-3p | 0.000115 | -1.7236639 |
| hsa-miR-374c-5p | 0.000118 | -3.7865635 |
| hsa-miR-374c-3p | 0.00012 | -1.8734678 |
| hsa-miR-23c | 0.000124 | -1.8630829 |
| hsa-miR-140-5p | 0.00016 | -6.1146885 |
| hsa-miR-338-3p | 0.000167 | -7.2262325 |
| hsa-miR-431-5p | 0.000137 | -1.8634097 |
| hsa-miR-4735-5p | 0.000139 | -1.6641668 |
| hsa-miR-144-3p | 0.000152 | -4.1939769 |
| hsa-miR-193a-3p | 0.000152 | -3.5852168 |
| hsa-miR-550a-3p | 0.000163 | -1.7215231 |
| hsa-miR-214-3p | 0.000175 | -2.1375454 |
| hsa-miR-576-5p | 0.00018 | -1.3852893 |
| hsa-miR-3691-3p | 0.000181 | -1.8060346 |
| hsa-miR-3162-3p | 0.000186 | -1.9953178 |
| hsa-miR-4790-5p | 0.000205 | -3.4131578 |
| hsa-miR-2964a-3p | 0.000205 | -2.2996075 |
| hsa-miR-4317 | 0.000207 | -1.4375518 |
| hsa-miR-151a-5p | 0.000208 | -2.3917797 |
| hsa-miR-3130-5p | 0.00021 | -1.5206167 |
| hsa-miR-26b-5p | 0.000213 | -4.8769323 |
| hsa-miR-4638-5p | 0.000219 | -2.3764513 |
| hsa-miR-676-5p | 0.000221 | -1.7503899 |
| hsa-miR-378i | 0.000224 | -3.0025979 |
| hsa-miR-548o-5p | 0.000312 | -3.2831295 |
| hsa-miR-548c-5p | 0.000312 | -3.2831295 |
| hsa-miR-548au-5p | 0.000312 | -3.2831295 |
| hsa-miR-548am-5p | 0.000312 | -3.2831295 |
| hsa-miR-17-5p | 0.000234 | -3.8587521 |
| hsa-miR-145-3p | 0.000258 | -1.7300813 |
| hsa-miR-27b-3p | 0.00026 | -2.9674764 |
| hsa-miR-302d-5p | 0.000361 | -4.2609682 |
| hsa-miR-4520b-3p | 0.000269 | -1.8091386 |
| hsa-miR-4282 | 0.000282 | -1.939035 |
| hsa-miR-24-1-5p | 0.000285 | -2.5094815 |
| hsa-let-7i-5p | 0.000294 | -2.227674 |
| hsa-miR-103a-2-5p | 0.000303 | -3.9164082 |
| hsa-miR-4671-5p | 0.000425 | -3.8348804 |
| hsa-miR-516b-3p | 0.000307 | -2.2044286 |
| hsa-miR-516a-3p | 0.000307 | -2.2044286 |
| hsa-miR-3126-3p | 0.000314 | -1.1933945 |
| hsa-miR-4489 | 0.000349 | -3.6994616 |
| hsa-miR-122-3p | 0.000319 | -1.8842891 |
| hsa-miR-4423-3p | 0.000321 | -1.5439509 |
| hsa-miR-455-5p | 0.00034 | -2.1885086 |
| hsa-miR-342-3p | 0.000352 | -3.3210764 |
| hsa-miR-545-3p | 0.000357 | -2.6361128 |
| hsa-miR-3620 | 0.00036 | -2.0432467 |
| hsa-miR-3176 | 0.000362 | -1.5123075 |
| hsa-miR-145-5p | 0.000368 | -3.4897492 |
| hsa-miR-5006-3p | 0.000387 | -1.3625125 |
| hsa-miR-100-5p | 0.000389 | -3.7482298 |
| hsa-miR-181a-3p | 0.000551 | -4.9545705 |
| hsa-miR-1537 | 0.000398 | -1.9337303 |
| hsa-miR-548a-5p | 0.0004 | -2.7944235 |
| hsa-miR-500b | 0.000404 | -1.5220799 |
| hsa-miR-500a-5p | 0.000404 | -1.5220799 |
| hsa-miR-103a-3p | 0.000411 | -1.5516175 |
| hsa-miR-4473 | 0.000416 | -1.6478751 |
| hsa-miR-183-5p | 0.000417 | -1.6482718 |
| hsa-miR-3651 | 0.00042 | -2.0999093 |
| hsa-miR-27a-3p | 0.000428 | -3.3241705 |
| hsa-miR-3678-5p | 0.000621 | -4.0875249 |
| hsa-miR-548z | 0.000453 | -1.9360059 |
| hsa-miR-548h-3p | 0.000453 | -1.9360059 |
| hsa-miR-24-3p | 0.000456 | -3.44826 |
| hsa-miR-4755-5p | 0.000468 | -2.5283339 |
| hsa-miR-648 | 0.00047 | -2.2127807 |
| hsa-miR-155-3p | 0.00061 | -3.7547737 |
| hsa-miR-599 | 0.000512 | -1.6219157 |
| hsa-miR-676-3p | 0.00052 | -1.457486 |
| hsa-let-7c | 0.00052 | -1.8434756 |
| hsa-miR-4445-5p | 0.000555 | -1.4625069 |
| hsa-miR-5197-5p | 0.000577 | -1.7078811 |
| hsa-miR-4747-3p | 0.000664 | -3.4249073 |
| hsa-miR-4753-3p | 0.000665 | -1.502599 |
| hsa-miR-4423-5p | 0.000667 | -1.3765087 |
| hsa-miR-3136-3p | 0.000675 | -1.2432923 |
| hsa-miR-4687-5p | 0.00068 | -1.4374081 |
| hsa-miR-139-5p | 0.000682 | -1.8843898 |
| hsa-miR-4778-3p | 0.00069 | -1.3658792 |
| hsa-miR-4520b-5p | 0.000696 | -1.4835995 |
| hsa-miR-4520a-5p | 0.000696 | -1.4835995 |
| hsa-miR-3913-3p | 0.000698 | -1.401766 |
| hsa-miR-128 | 0.000735 | -2.7235438 |
| hsa-miR-190a | 0.00128 | -4.913328 |
| hsa-miR-5587-3p | 0.000749 | -2.4970915 |
| hsa-miR-199a-5p | 0.000758 | -3.3710171 |
| hsa-miR-5702 | 0.000824 | -3.2872171 |
| hsa-miR-3133 | 0.000837 | -1.2173146 |
| hsa-miR-499a-3p | 0.000942 | -3.7958732 |
| hsa-miR-497-5p | 0.000956 | -2.7353792 |
| hsa-miR-29b-2-5p | 0.000867 | -1.4404517 |
| hsa-miR-3686 | 0.000888 | -1.4366001 |
| hsa-miR-34b-5p | 0.000894 | -3.7960052 |
| hsa-miR-323b-5p | 0.00091 | -1.6602155 |
| hsa-miR-548o-3p | 0.00134 | -3.3779947 |
| hsa-miR-4678 | 0.000941 | -3.6676045 |
| hsa-miR-656 | 0.000946 | -1.1203948 |
| hsa-miR-3682-5p | 0.00101 | -1.2104631 |
| hsa-miR-5685 | 0.00104 | -2.1089328 |
| hsa-miR-498 | 0.00105 | -1.1361355 |
| hsa-miR-539-3p | 0.00106 | -1.3905697 |
| hsa-miR-4685-3p | 0.00109 | -1.1466385 |
| hsa-miR-212-3p | 0.00112 | -1.3172523 |
| hsa-miR-378c | 0.00113 | -1.2529862 |
| hsa-miR-4290 | 0.00114 | -1.2716103 |
| hsa-miR-643 | 0.00227 | -3.3086499 |
| hsa-miR-502-3p | 0.00116 | -1.2818208 |
| hsa-miR-188-5p | 0.00147 | -1.800794 |
| hsa-miR-3670 | 0.00123 | -1.3213333 |
| hsa-miR-27a-5p | 0.00124 | -2.0553993 |
| hsa-miR-19b-3p | 0.00126 | -3.5987463 |
| hsa-let-7e-3p | 0.00157 | -2.1925312 |
| hsa-miR-4999-3p | 0.00127 | -2.2851358 |
| hsa-miR-4667-3p | 0.00137 | -1.5208686 |
| hsa-miR-3189-3p | 0.0014 | -2.9465531 |
| hsa-miR-4328 | 0.00143 | -3.018246 |
| hsa-miR-18b-3p | 0.00151 | -1.6940133 |
| hsa-miR-556-3p | 0.00188 | -3.1892146 |
| hsa-let-7a-3p | 0.00259 | -5.1467485 |
| hsa-miR-642b-5p | 0.00155 | -1.6434304 |
| hsa-miR-3184-3p | 0.00157 | -1.2801501 |
| hsa-miR-143-3p | 0.00157 | -3.2456961 |
| hsa-miR-532-5p | 0.00163 | -1.8100628 |
| hsa-miR-138-1-3p | 0.00165 | -2.9424675 |
| hsa-miR-4632 | 0.00173 | -1.0734325 |
| hsa-miR-4529-5p | 0.00297 | -3.410301 |
| hsa-miR-4796-5p | 0.00174 | -1.2759366 |
| hsa-miR-135b-5p | 0.00175 | -1.5621639 |
| hsa-miR-3681-3p | 0.00175 | -3.0764262 |
| hsa-miR-649 | 0.00177 | -1.3371127 |
| hsa-miR-125b-5p | 0.0018 | -2.2226164 |
| hsa-miR-135a-5p | 0.00183 | -1.5602624 |
| hsa-miR-4684-5p | 0.00188 | -1.7206682 |
| hsa-miR-3191-5p | 0.00193 | -1.3491849 |
| hsa-miR-4310 | 0.00194 | -1.4739087 |
| hsa-miR-29c-5p | 0.00197 | -1.8671588 |
| hsa-miR-142-3p | 0.00198 | -5.6200924 |
| hsa-miR-4760-3p | 0.0043 | -3.5241013 |
| hsa-miR-124-3p | 0.00204 | -1.2578536 |
| hsa-miR-3129-5p | 0.00207 | -1.1803388 |
| hsa-miR-371b-5p | 0.00208 | -1.117175 |
| hsa-miR-4781-3p | 0.00216 | -3.5835872 |
| hsa-miR-3650 | 0.00221 | -1.7130292 |
| hsa-miR-1184 | 0.00226 | -1.9074349 |
| hsa-miR-29a-3p | 0.00233 | -1.9645398 |
| hsa-miR-4762-3p | 0.00236 | -1.5035231 |
| hsa-miR-133a | 0.00237 | -1.5588399 |
| hsa-miR-19a-3p | 0.00268 | -3.0208285 |
| hsa-miR-151b | 0.00246 | -1.4707899 |
| hsa-miR-151a-5p | 0.00246 | -1.4707899 |
| hsa-miR-3158-3p | 0.00246 | -1.2500775 |
| hsa-miR-767-3p | 0.00276 | -2.4812381 |
| hsa-miR-362-5p | 0.00348 | -2.2616594 |
| hsa-miR-412 | 0.00257 | -1.0370385 |
| hsa-miR-4275 | 0.00268 | -2.5004216 |
| hsa-miR-1273d | 0.00269 | -1.9308467 |
| hsa-miR-466 | 0.0048 | -2.1982354 |
| hsa-miR-34c-3p | 0.00339 | -3.3543058 |
| hsa-miR-625-5p | 0.00274 | -1.8730535 |
| hsa-miR-4639-3p | 0.00274 | -1.039596 |
| hsa-miR-374a-3p | 0.00442 | -2.7187397 |
| hsa-miR-200a-3p | 0.00281 | -2.5075218 |
| hsa-miR-191-5p | 0.0029 | -2.0112837 |
| hsa-miR-588 | 0.00466 | -3.5676851 |
| hsa-miR-361-5p | 0.00296 | -1.2144344 |
| hsa-miR-3621 | 0.00298 | -1.4083655 |
| hsa-miR-2355-3p | 0.00299 | -1.0198983 |
| hsa-miR-548n | 0.00305 | -1.1456484 |
| hsa-miR-574-3p | 0.00307 | -1.1314152 |
| hsa-miR-223-3p | 0.00312 | -2.1508594 |
| hsa-miR-148b-3p | 0.00336 | -1.9587506 |
| hsa-miR-181d | 0.00336 | -1.0752084 |
| hsa-miR-200b-3p | 0.00337 | -1.2680961 |
| hsa-miR-1291 | 0.00337 | -1.6206033 |
| hsa-miR-3140-3p | 0.0034 | -2.81505 |
| hsa-miR-548au-3p | 0.00621 | -3.7571806 |
| hsa-miR-4284 | 0.00349 | -3.1216882 |
| hsa-miR-4302 | 0.00351 | -1.3626119 |
| hsa-miR-548as-3p | 0.00358 | -1.0033031 |
| hsa-miR-196b-5p | 0.0036 | -1.2284002 |
| hsa-miR-4289 | 0.00366 | -2.0324543 |
| hsa-miR-3664-3p | 0.0037 | -1.4246248 |
| hsa-miR-29b-3p | 0.00377 | -2.7479741 |
| hsa-let-7b-5p | 0.00383 | -1.4694675 |
| hsa-let-7f-5p | 0.00384 | -2.4774888 |
| hsa-miR-532-3p | 0.00386 | -1.1223742 |
| hsa-miR-3692-3p | 0.00387 | -1.0696991 |
| hsa-miR-4722-3p | 0.00387 | -1.4659754 |
| hsa-miR-302f | 0.00388 | -1.1699129 |
| hsa-miR-548at-5p | 0.00391 | -1.4097319 |
| hsa-miR-4469 | 0.004 | -2.4978649 |
| hsa-miR-378g | 0.00403 | -2.0060154 |
| hsa-miR-548b-3p | 0.00504 | -1.7607552 |
| hsa-miR-142-5p | 0.00421 | -3.022063 |
| hsa-miR-5692c | 0.00425 | -1.32206 |
| hsa-miR-34c-5p | 0.0043 | -2.6149524 |
| hsa-miR-125a-5p | 0.00439 | -1.4705435 |
| hsa-miR-4763-5p | 0.0044 | -1.8813426 |
| hsa-miR-326 | 0.00447 | -1.5876334 |
| hsa-miR-449b-5p | 0.00449 | -1.3976609 |
| hsa-miR-3681-5p | 0.0045 | -1.1465089 |
| hsa-miR-26b-3p | 0.00453 | -2.6673025 |
| hsa-miR-377-3p | 0.00455 | -2.8147683 |
| hsa-miR-2053 | 0.00825 | -2.571725 |
| hsa-miR-4715-5p | 0.0046 | -1.2436977 |
| hsa-miR-3123 | 0.00467 | -1.0142288 |
| hsa-miR-365b-3p | 0.00469 | -1.0904532 |
| hsa-miR-365a-3p | 0.00469 | -1.0904532 |
| hsa-miR-3124-3p | 0.00473 | -1.1746517 |
| hsa-miR-3132 | 0.0048 | -1.182231 |
| hsa-miR-5590-3p | 0.0048 | -1.3117719 |
| hsa-miR-106b-5p | 0.00484 | -1.9274878 |
| hsa-miR-378d | 0.00486 | -1.2104306 |
| hsa-miR-324-5p | 0.00706 | -3.8044854 |
| hsa-miR-301a-5p | 0.00511 | -1.4429825 |
| hsa-miR-5579-3p | 0.00514 | -2.7758541 |
| hsa-miR-4692 | 0.00518 | -2.1631033 |
| hsa-miR-3927 | 0.00535 | -1.3032718 |
| hsa-miR-5009-5p | 0.00542 | -1.1610128 |
| hsa-miR-4680-3p | 0.00545 | -1.0834093 |
| hsa-miR-5687 | 0.0165 | -4.1604921 |
| hsa-miR-133b | 0.00558 | -1.1041962 |
| hsa-miR-626 | 0.0056 | -1.1207464 |
| hsa-miR-668 | 0.00589 | -1.1064445 |
| hsa-miR-4712-5p | 0.00731 | -2.350145 |
| hsa-miR-4307 | 0.00601 | -1.0944828 |
| hsa-miR-191-3p | 0.00606 | -1.4485635 |
| hsa-miR-5690 | 0.00619 | -1.2345911 |
| hsa-miR-611 | 0.00631 | -1.9659965 |
| hsa-miR-429 | 0.00632 | -2.2072935 |
| hsa-miR-199b-3p | 0.00642 | -4.962066 |
| hsa-miR-199a-3p | 0.00642 | -4.962066 |
| hsa-miR-4520a-3p | 0.00649 | -2.4898012 |
| hsa-miR-34a-5p | 0.00665 | -1.9437602 |
| hsa-miR-5583-5p | 0.0125 | -3.1139697 |
| hsa-miR-4456 | 0.00688 | -1.6596704 |
| hsa-miR-4714-3p | 0.00719 | -2.0407273 |
| hsa-miR-744-3p | 0.00741 | -1.9346243 |
| hsa-miR-548k | 0.0233 | -3.6750656 |
| hsa-miR-548av-5p | 0.0233 | -3.6750656 |
| hsa-miR-29c-3p | 0.00753 | -2.6280901 |
| hsa-miR-4295 | 0.00853 | -1.5474488 |
| hsa-miR-4326 | 0.00789 | -1.1193203 |
| hsa-miR-216a | 0.00789 | -1.5249467 |
| hsa-miR-152 | 0.0084 | -1.9725846 |
| hsa-miR-1343 | 0.0273 | -3.4686147 |
| hsa-miR-1256 | 0.00881 | -1.1623241 |
| hsa-miR-604 | 0.00883 | -1.4539121 |
| hsa-miR-3908 | 0.00893 | -1.2671405 |
| hsa-miR-146b-5p | 0.00916 | -2.1207962 |
| hsa-miR-548ag | 0.00918 | -1.0226273 |
| hsa-miR-519b-3p | 0.0115 | -2.1933156 |
| hsa-miR-1295b-3p | 0.0189 | -1.973608 |
| hsa-miR-5586-5p | 0.0255 | -3.0472359 |
| hsa-miR-551b-3p | 0.00982 | -2.9198137 |
| hsa-miR-889 | 0.00982 | -1.7857826 |
| hsa-miR-1911-5p | 0.00991 | -1.3004954 |
| hsa-miR-4726-3p | 0.0123 | -3.0636664 |
| hsa-miR-4431 | 0.00998 | -1.5198598 |
| hsa-miR-4665-3p | 0.0101 | -1.2889548 |
| hsa-miR-4789-3p | 0.0102 | -1.5769733 |
| hsa-miR-34b-3p | 0.0103 | -1.4178903 |
| hsa-miR-148a-3p | 0.0106 | -2.8794349 |
| hsa-miR-3187-3p | 0.0194 | -1.4102328 |
| hsa-miR-196b-3p | 0.0113 | -1.7403936 |
| hsa-miR-4713-5p | 0.0113 | -1.3424733 |
| hsa-miR-508-3p | 0.0114 | -1.6751702 |
| hsa-miR-329 | 0.0126 | -1.4432305 |
| hsa-miR-517b-3p | 0.0216 | -2.6150471 |
| hsa-miR-517a-3p | 0.0216 | -2.6150471 |
| hsa-miR-3139 | 0.0121 | -1.7145086 |
| hsa-miR-3190-5p | 0.0122 | -1.4700135 |
| hsa-miR-548q | 0.0122 | -1.9944443 |
| hsa-miR-3678-3p | 0.0143 | -3.8060675 |
| hsa-miR-3529-3p | 0.0244 | -2.0036494 |
| hsa-miR-96-5p | 0.0158 | -2.6695036 |
| hsa-miR-1279 | 0.0145 | -2.482964 |
| hsa-miR-3974 | 0.0138 | -1.5452187 |
| hsa-miR-139-3p | 0.014 | -1.1163305 |
| hsa-miR-1539 | 0.0156 | -1.5185483 |
| hsa-miR-3663-3p | 0.0145 | -2.131464 |
| hsa-miR-4313 | 0.0146 | -1.319902 |
| hsa-let-7f-2-3p | 0.0271 | -2.3044323 |
| hsa-miR-3182 | 0.0146 | -1.4900178 |
| hsa-miR-2682-3p | 0.0154 | -1.1156147 |
| hsa-miR-940 | 0.0155 | -1.0280521 |
| hsa-miR-4269 | 0.0173 | -1.1223924 |
| hsa-miR-4262 | 0.0159 | -1.018714 |
| hsa-miR-5001-3p | 0.016 | -1.2181127 |
| hsa-miR-4701-5p | 0.0161 | -1.4251817 |
| hsa-miR-621 | 0.0426 | -2.1515288 |
| hsa-miR-4493 | 0.0244 | -2.0772172 |
| hsa-miR-629-5p | 0.0178 | -1.1389164 |
| hsa-miR-192-5p | 0.0179 | -1.0565911 |
| hsa-miR-4445-3p | 0.018 | -1.5302125 |
| hsa-miR-4802-5p | 0.0372 | -3.2491918 |
| hsa-miR-4662a-5p | 0.0292 | -1.5799452 |
| hsa-miR-4705 | 0.0208 | -1.9779414 |
| hsa-miR-507 | 0.0193 | -1.0796849 |
| hsa-miR-1295b-5p | 0.0285 | -3.201907 |
| hsa-miR-4294 | 0.02 | -2.0656516 |
| hsa-miR-3677-3p | 0.0221 | -2.7771166 |
| hsa-miR-1249 | 0.0224 | -1.3582314 |
| hsa-miR-3545-5p | 0.0226 | -1.4746707 |
| hsa-miR-497-3p | 0.0227 | -1.0473793 |
| hsa-miR-30d-3p | 0.0232 | -1.1612019 |
| hsa-miR-93-5p | 0.0234 | -1.4896524 |
| hsa-miR-548ad | 0.0441 | -1.2943896 |
| hsa-miR-5686 | 0.024 | -1.2217353 |
| hsa-miR-1206 | 0.0242 | -1.119027 |
| hsa-miR-4642 | 0.0245 | -1.0056893 |
| hsa-miR-30d-5p | 0.0246 | -1.2769788 |
| hsa-miR-4418 | 0.0276 | -2.185461 |
| hsa-miR-200c-3p | 0.0261 | -1.3329978 |
| hsa-miR-662 | 0.0322 | -1.9346014 |
| hsa-miR-93-3p | 0.0265 | -1.0146833 |
| hsa-miR-4301 | 0.0298 | -2.134162 |
| hsa-miR-345-3p | 0.0305 | -1.3967699 |
| hsa-miR-149-5p | 0.0309 | -1.5983516 |
| hsa-miR-23a-3p | 0.0312 | -2.2611573 |
| hsa-miR-337-5p | 0.0312 | -1.5568852 |
| hsa-miR-518e-3p | 0.046 | -2.3394341 |
| hsa-miR-875-3p | 0.0325 | -1.2368983 |
| hsa-let-7d-5p | 0.0326 | -1.2938121 |
| hsa-miR-876-3p | 0.0334 | -1.1641254 |
| hsa-miR-19a-5p | 0.0408 | -2.536277 |
| hsa-miR-802 | 0.0368 | -2.8838621 |
| hsa-miR-942 | 0.0346 | -1.0797608 |
| hsa-miR-3128 | 0.0459 | -2.3741643 |
| hsa-miR-422a | 0.0349 | -1.2336115 |
| hsa-miR-1282 | 0.0355 | -1.5609876 |
| hsa-miR-652-3p | 0.0356 | -1.5592349 |
| hsa-miR-4655-3p | 0.0441 | -2.444344 |
| hsa-miR-218-5p | 0.0363 | -1.216082 |
| hsa-miR-215 | 0.0373 | -1.3539599 |
| hsa-miR-1263 | 0.0374 | -1.2916406 |
| hsa-miR-584-3p | 0.0472 | -1.4781807 |
| hsa-miR-1182 | 0.0445 | -1.6676707 |
| hsa-miR-4291 | 0.0447 | -1.1634863 |
| hsa-miR-186-5p | 0.0454 | -1.0255624 |
| hsa-miR-3622a-5p | 0.0455 | -2.7595916 |
| hsa-miR-141-3p | 0.0466 | -1.4911647 |
| hsa-miR-4659b-5p | 0.0487 | -1.3517212 |
| hsa-miR-126-5p | 3.63E-08 | -6.7550476 |
| hsa-miR-195-5p | 0.000000576 | -5.7738294 |

| **Table S4** The circRNA-miRNA pairs predicted by circinteratome. | |
| --- | --- |
| circRNA | miRNA |
| hsa_circ_0072088 | hsa-miR-1225-5p |
| hsa_circ_0072088 | hsa-miR-1236 |
| hsa_circ_0072088 | hsa-miR-1251 |
| hsa_circ_0072088 | hsa-miR-1261 |
| hsa_circ_0072088 | hsa-miR-1270 |
| hsa_circ_0072088 | hsa-miR-1288 |
| hsa_circ_0072088 | hsa-miR-1324 |
| hsa_circ_0072088 | hsa-miR-197 |
| hsa_circ_0072088 | hsa-miR-223 |
| hsa_circ_0072088 | hsa-miR-330-3p |
| hsa_circ_0072088 | hsa-miR-375 |
| hsa_circ_0072088 | hsa-miR-377 |
| hsa_circ_0072088 | hsa-miR-516a-5p |
| hsa_circ_0072088 | hsa-miR-532-3p |
| hsa_circ_0072088 | hsa-miR-545 |
| hsa_circ_0072088 | hsa-miR-548g |
| hsa_circ_0072088 | hsa-miR-548p |
| hsa_circ_0072088 | hsa-miR-578 |
| hsa_circ_0072088 | hsa-miR-607 |
| hsa_circ_0072088 | hsa-miR-616 |
| hsa_circ_0072088 | hsa-miR-620 |
| hsa_circ_0072088 | hsa-miR-624 |
| hsa_circ_0072088 | hsa-miR-942 |
| hsa_circ_0072088 | hsa-miR-944 |

| **Table S5** The miRNA-mRNA pairs predicted by starbase database. | |
| --- | --- |
| miRNAname | geneName |
| hsa-miR-942-5p | IL13RA1 |
| hsa-miR-942-5p | CCNL2 |
| hsa-miR-942-5p | SSU72 |
| hsa-miR-942-5p | CDK11A |
| hsa-miR-942-5p | PEX10 |
| hsa-miR-942-5p | ICMT |
| hsa-miR-942-5p | NOL9 |
| hsa-miR-942-5p | KLHL21 |
| hsa-miR-942-5p | ERRFI1 |
| hsa-miR-942-5p | DFFA |
| hsa-miR-942-5p | EXOSC10 |
| hsa-miR-942-5p | MTHFR |
| hsa-miR-942-5p | RSG1 |
| hsa-miR-942-5p | RCC2 |
| hsa-miR-942-5p | EMC1 |
| hsa-miR-942-5p | CAPZB |
| hsa-miR-942-5p | PLA2G2D |
| hsa-miR-942-5p | CAMK2N1 |
| hsa-miR-942-5p | HP1BP3 |
| hsa-miR-942-5p | EIF4G3 |
| hsa-miR-942-5p | LUZP1 |
| hsa-miR-942-5p | TCEA3 |
| hsa-miR-942-5p | RUNX3 |
| hsa-miR-942-5p | AUNIP |
| hsa-miR-942-5p | SLC9A1 |
| hsa-miR-942-5p | WASF2 |
| hsa-miR-942-5p | AHDC1 |
| hsa-miR-942-5p | TAF12 |
| hsa-miR-942-5p | TMEM200B |
| hsa-miR-942-5p | SRSF4 |
| hsa-miR-942-5p | PUM1 |
| hsa-miR-942-5p | PEF1 |
| hsa-miR-942-5p | ZBTB8OS |
| hsa-miR-942-5p | RNF19B |
| hsa-miR-942-5p | AK2 |
| hsa-miR-942-5p | PHC2 |
| hsa-miR-942-5p | CLSPN |
| hsa-miR-942-5p | STK40 |
| hsa-miR-942-5p | MEAF6 |
| hsa-miR-942-5p | MYCBP |
| hsa-miR-942-5p | AL139260.3 |
| hsa-miR-942-5p | TRIT1 |
| hsa-miR-942-5p | SCMH1 |
| hsa-miR-942-5p | SLC2A1 |
| hsa-miR-942-5p | EBNA1BP2 |
| hsa-miR-942-5p | MED8 |
| hsa-miR-942-5p | GPBP1L1 |
| hsa-miR-942-5p | PIK3R3 |
| hsa-miR-942-5p | LRRC41 |
| hsa-miR-942-5p | MOB3C |
| hsa-miR-942-5p | EFCAB14 |
| hsa-miR-942-5p | FAF1 |
| hsa-miR-942-5p | RAB3B |
| hsa-miR-942-5p | LRP8 |
| hsa-miR-942-5p | DHCR24 |
| hsa-miR-942-5p | USP24 |
| hsa-miR-942-5p | PLPP3 |
| hsa-miR-942-5p | DAB1 |
| hsa-miR-942-5p | TACSTD2 |
| hsa-miR-942-5p | MYSM1 |
| hsa-miR-942-5p | JUN |
| hsa-miR-942-5p | SERBP1 |
| hsa-miR-942-5p | WLS |
| hsa-miR-942-5p | ZRANB2 |
| hsa-miR-942-5p | NEGR1 |
| hsa-miR-942-5p | AC118549.1 |
| hsa-miR-942-5p | TTLL7 |
| hsa-miR-942-5p | DDAH1 |
| hsa-miR-942-5p | ZNHIT6 |
| hsa-miR-942-5p | GBP1 |
| hsa-miR-942-5p | GFI1 |
| hsa-miR-942-5p | TMED5 |
| hsa-miR-942-5p | BCAR3 |
| hsa-miR-942-5p | GCLM |
| hsa-miR-942-5p | DBT |
| hsa-miR-942-5p | PSRC1 |
| hsa-miR-942-5p | DRAM2 |
| hsa-miR-942-5p | WDR77 |
| hsa-miR-942-5p | FAM212B |
| hsa-miR-942-5p | SLC16A1 |
| hsa-miR-942-5p | RSBN1 |
| hsa-miR-942-5p | TRIM33 |
| hsa-miR-942-5p | NRAS |
| hsa-miR-942-5p | SIKE1 |
| hsa-miR-942-5p | NHLH2 |
| hsa-miR-942-5p | IGSF3 |
| hsa-miR-942-5p | WARS2 |
| hsa-miR-942-5p | ZNF697 |
| hsa-miR-942-5p | NOTCH2 |
| hsa-miR-942-5p | NBPF11 |
| hsa-miR-942-5p | PRKAB2 |
| hsa-miR-942-5p | NBPF24 |
| hsa-miR-942-5p | NBPF14 |
| hsa-miR-942-5p | NBPF20 |
| hsa-miR-942-5p | HIST2H2BE |
| hsa-miR-942-5p | SV2A |
| hsa-miR-942-5p | OTUD7B |
| hsa-miR-942-5p | MCL1 |
| hsa-miR-942-5p | GOLPH3L |
| hsa-miR-942-5p | ARNT |
| hsa-miR-942-5p | CERS2 |
| hsa-miR-942-5p | CDC42SE1 |
| hsa-miR-942-5p | PI4KB |
| hsa-miR-942-5p | TDRKH |
| hsa-miR-942-5p | THEM4 |
| hsa-miR-942-5p | GATAD2B |
| hsa-miR-942-5p | SHE |
| hsa-miR-942-5p | PBXIP1 |
| hsa-miR-942-5p | PYGO2 |
| hsa-miR-942-5p | MUC1 |
| hsa-miR-942-5p | AL713999.1 |
| hsa-miR-942-5p | ASH1L |
| hsa-miR-942-5p | YY1AP1 |
| hsa-miR-942-5p | RIT1 |
| hsa-miR-942-5p | SSR2 |
| hsa-miR-942-5p | MEX3A |
| hsa-miR-942-5p | SMG5 |
| hsa-miR-942-5p | CCT3 |
| hsa-miR-942-5p | GPATCH4 |
| hsa-miR-942-5p | ISG20L2 |
| hsa-miR-942-5p | ETV3 |
| hsa-miR-942-5p | DCAF8 |
| hsa-miR-942-5p | CD84 |
| hsa-miR-942-5p | F11R |
| hsa-miR-942-5p | B4GALT3 |
| hsa-miR-942-5p | OLFML2B |
| hsa-miR-942-5p | CREG1 |
| hsa-miR-942-5p | SLC19A2 |
| hsa-miR-942-5p | RC3H1 |
| hsa-miR-942-5p | COP1 |
| hsa-miR-942-5p | ABL2 |
| hsa-miR-942-5p | TOR1AIP2 |
| hsa-miR-942-5p | STX6 |
| hsa-miR-942-5p | GLUL |
| hsa-miR-942-5p | KIF21B |
| hsa-miR-942-5p | LAD1 |
| hsa-miR-942-5p | PHLDA3 |
| hsa-miR-942-5p | LMOD1 |
| hsa-miR-942-5p | ARL8A |
| hsa-miR-942-5p | SYT2 |
| hsa-miR-942-5p | KDM5B |
| hsa-miR-942-5p | KLHL12 |
| hsa-miR-942-5p | PLEKHA6 |
| hsa-miR-942-5p | PPP1R15B |
| hsa-miR-942-5p | PIK3C2B |
| hsa-miR-942-5p | ELK4 |
| hsa-miR-942-5p | SLC45A3 |
| hsa-miR-942-5p | RAB29 |
| hsa-miR-942-5p | C1orf116 |
| hsa-miR-942-5p | PLXNA2 |
| hsa-miR-942-5p | LPGAT1 |
| hsa-miR-942-5p | GPATCH2 |
| hsa-miR-942-5p | EPRS |
| hsa-miR-942-5p | DUSP10 |
| hsa-miR-942-5p | TP53BP2 |
| hsa-miR-942-5p | WDR26 |
| hsa-miR-942-5p | TMEM63A |
| hsa-miR-942-5p | ACBD3 |
| hsa-miR-942-5p | LIN9 |
| hsa-miR-942-5p | ITPKB |
| hsa-miR-942-5p | CDC42BPA |
| hsa-miR-942-5p | TAF5L |
| hsa-miR-942-5p | SIPA1L2 |
| hsa-miR-942-5p | IRF2BP2 |
| hsa-miR-942-5p | CHML |
| hsa-miR-942-5p | AKT3 |
| hsa-miR-942-5p | HNRNPU |
| hsa-miR-942-5p | SMYD3 |
| hsa-miR-942-5p | ZNF669 |
| hsa-miR-942-5p | CPTP |
| hsa-miR-942-5p | PRDM16 |
| hsa-miR-942-5p | CAMTA1 |
| hsa-miR-942-5p | VAMP3 |
| hsa-miR-942-5p | PER3 |
| hsa-miR-942-5p | H6PD |
| hsa-miR-942-5p | TMEM201 |
| hsa-miR-942-5p | UBE4B |
| hsa-miR-942-5p | KIF1B |
| hsa-miR-942-5p | UBIAD1 |
| hsa-miR-942-5p | PLOD1 |
| hsa-miR-942-5p | VPS13D |
| hsa-miR-942-5p | PDPN |
| hsa-miR-942-5p | KAZN |
| hsa-miR-942-5p | TMEM51 |
| hsa-miR-942-5p | EFHD2 |
| hsa-miR-942-5p | DNAJC16 |
| hsa-miR-942-5p | DDI2 |
| hsa-miR-942-5p | RSC1A1 |
| hsa-miR-942-5p | PLEKHM2 |
| hsa-miR-942-5p | MINOS1 |
| hsa-miR-942-5p | OTUD3 |
| hsa-miR-942-5p | NBPF3 |
| hsa-miR-942-5p | ZBTB40 |
| hsa-miR-942-5p | EPHB2 |
| hsa-miR-942-5p | PITHD1 |
| hsa-miR-942-5p | NIPAL3 |
| hsa-miR-942-5p | CLIC4 |
| hsa-miR-942-5p | TMEM50A |
| hsa-miR-942-5p | LDLRAP1 |
| hsa-miR-942-5p | SELENON |
| hsa-miR-942-5p | MTFR1L |
| hsa-miR-942-5p | PDIK1L |
| hsa-miR-942-5p | DHDDS |
| hsa-miR-942-5p | RPS6KA1 |
| hsa-miR-942-5p | ARID1A |
| hsa-miR-942-5p | PIGV |
| hsa-miR-942-5p | ZDHHC18 |
| hsa-miR-942-5p | STX12 |
| hsa-miR-942-5p | SMPDL3B |
| hsa-miR-942-5p | SESN2 |
| hsa-miR-942-5p | PHACTR4 |
| hsa-miR-942-5p | RCC1 |
| hsa-miR-942-5p | ZCCHC17 |
| hsa-miR-942-5p | EIF3I |
| hsa-miR-942-5p | RBBP4 |
| hsa-miR-942-5p | KIAA1522 |
| hsa-miR-942-5p | S100PBP |
| hsa-miR-942-5p | ZNF362 |
| hsa-miR-942-5p | AGO4 |
| hsa-miR-942-5p | AGO1 |
| hsa-miR-942-5p | SH3D21 |
| hsa-miR-942-5p | MACF1 |
| hsa-miR-942-5p | CAP1 |
| hsa-miR-942-5p | RLF |
| hsa-miR-942-5p | SMAP2 |
| hsa-miR-942-5p | EXO5 |
| hsa-miR-942-5p | PPCS |
| hsa-miR-942-5p | C1orf50 |
| hsa-miR-942-5p | PTPRF |
| hsa-miR-942-5p | NASP |
| hsa-miR-942-5p | BTF3L4 |
| hsa-miR-942-5p | SCP2 |
| hsa-miR-942-5p | TCEANC2 |
| hsa-miR-942-5p | TTC4 |
| hsa-miR-942-5p | MROH7-TTC4 |
| hsa-miR-942-5p | C8A |
| hsa-miR-942-5p | NFIA |
| hsa-miR-942-5p | USP1 |
| hsa-miR-942-5p | ATG4C |
| hsa-miR-942-5p | AK4 |
| hsa-miR-942-5p | LEPROT |
| hsa-miR-942-5p | FPGT-TNNI3K |
| hsa-miR-942-5p | NEXN |
| hsa-miR-942-5p | PRKACB |
| hsa-miR-942-5p | CYR61 |
| hsa-miR-942-5p | HS2ST1 |
| hsa-miR-942-5p | AC093155.3 |
| hsa-miR-942-5p | ZNF326 |
| hsa-miR-942-5p | DR1 |
| hsa-miR-942-5p | FNBP1L |
| hsa-miR-942-5p | AGL |
| hsa-miR-942-5p | SLC35A3 |
| hsa-miR-942-5p | RTCA |
| hsa-miR-942-5p | RNPC3 |
| hsa-miR-942-5p | FAM102B |
| hsa-miR-942-5p | PRPF38B |
| hsa-miR-942-5p | STXBP3 |
| hsa-miR-942-5p | CYB561D1 |
| hsa-miR-942-5p | GNAI3 |
| hsa-miR-942-5p | AHCYL1 |
| hsa-miR-942-5p | STRIP1 |
| hsa-miR-942-5p | KCNC4 |
| hsa-miR-942-5p | RBM15 |
| hsa-miR-942-5p | HIPK1 |
| hsa-miR-942-5p | VANGL1 |
| hsa-miR-942-5p | SLC22A15 |
| hsa-miR-942-5p | MAN1A2 |
| hsa-miR-942-5p | FAM46C |
| hsa-miR-942-5p | WDR3 |
| hsa-miR-942-5p | NBPF9 |
| hsa-miR-942-5p | AC239799.1 |
| hsa-miR-942-5p | NOTCH2NL |
| hsa-miR-942-5p | NBPF10 |
| hsa-miR-942-5p | TXNIP |
| hsa-miR-942-5p | NBPF12 |
| hsa-miR-942-5p | NBPF15 |
| hsa-miR-942-5p | NBPF16 |
| hsa-miR-942-5p | BOLA1 |
| hsa-miR-942-5p | GABPB2 |
| hsa-miR-942-5p | PIP5K1A |
| hsa-miR-942-5p | CGN |
| hsa-miR-942-5p | TUFT1 |
| hsa-miR-942-5p | SNX27 |
| hsa-miR-942-5p | CHTOP |
| hsa-miR-942-5p | INTS3 |
| hsa-miR-942-5p | ZBTB7B |
| hsa-miR-942-5p | EFNA1 |
| hsa-miR-942-5p | HCN3 |
| hsa-miR-942-5p | DAP3 |
| hsa-miR-942-5p | SYT11 |
| hsa-miR-942-5p | LMNA |
| hsa-miR-942-5p | SLC25A44 |
| hsa-miR-942-5p | KIRREL1 |
| hsa-miR-942-5p | PEA15 |
| hsa-miR-942-5p | TOMM40L |
| hsa-miR-942-5p | SDHC |
| hsa-miR-942-5p | DUSP12 |
| hsa-miR-942-5p | C1orf226 |
| hsa-miR-942-5p | RGS4 |
| hsa-miR-942-5p | PBX1 |
| hsa-miR-942-5p | POGK |
| hsa-miR-942-5p | POU2F1 |
| hsa-miR-942-5p | MPZL1 |
| hsa-miR-942-5p | SFT2D2 |
| hsa-miR-942-5p | PRDX6 |
| hsa-miR-942-5p | RASAL2 |
| hsa-miR-942-5p | RALGPS2 |
| hsa-miR-942-5p | SOAT1 |
| hsa-miR-942-5p | CEP350 |
| hsa-miR-942-5p | QSOX1 |
| hsa-miR-942-5p | LHX4 |
| hsa-miR-942-5p | IER5 |
| hsa-miR-942-5p | LAMC1 |
| hsa-miR-942-5p | SMG7 |
| hsa-miR-942-5p | ODR4 |
| hsa-miR-942-5p | RGS2 |
| hsa-miR-942-5p | TROVE2 |
| hsa-miR-942-5p | NEK7 |
| hsa-miR-942-5p | CAMSAP2 |
| hsa-miR-942-5p | NAV1 |
| hsa-miR-942-5p | IPO9 |
| hsa-miR-942-5p | TIMM17A |
| hsa-miR-942-5p | ELF3 |
| hsa-miR-942-5p | PPP1R12B |
| hsa-miR-942-5p | BTG2 |
| hsa-miR-942-5p | ATP2B4 |
| hsa-miR-942-5p | SNRPE |
| hsa-miR-942-5p | SOX13 |
| hsa-miR-942-5p | SRGAP2 |
| hsa-miR-942-5p | IKBKE |
| hsa-miR-942-5p | RASSF5 |
| hsa-miR-942-5p | MAPKAPK2 |
| hsa-miR-942-5p | IL24 |
| hsa-miR-942-5p | PFKFB2 |
| hsa-miR-942-5p | CD46 |
| hsa-miR-942-5p | DIEXF |
| hsa-miR-942-5p | ATF3 |
| hsa-miR-942-5p | RPS6KC1 |
| hsa-miR-942-5p | CENPF |
| hsa-miR-942-5p | 1-Mar |
| hsa-miR-942-5p | MIA3 |
| hsa-miR-942-5p | CAPN2 |
| hsa-miR-942-5p | COQ8A |
| hsa-miR-942-5p | WNT3A |
| hsa-miR-942-5p | IBA57 |
| hsa-miR-942-5p | RHOU |
| hsa-miR-942-5p | GALNT2 |
| hsa-miR-942-5p | COG2 |
| hsa-miR-942-5p | SPRTN |
| hsa-miR-942-5p | EDARADD |
| hsa-miR-942-5p | MTR |
| hsa-miR-942-5p | ZBTB18 |
| hsa-miR-942-5p | DESI2 |
| hsa-miR-942-5p | DIP2C |
| hsa-miR-942-5p | ASB13 |
| hsa-miR-942-5p | GDI2 |
| hsa-miR-942-5p | ITIH5 |
| hsa-miR-942-5p | KIN |
| hsa-miR-942-5p | UPF2 |
| hsa-miR-942-5p | CCDC3 |
| hsa-miR-942-5p | BEND7 |
| hsa-miR-942-5p | FAM107B |
| hsa-miR-942-5p | NEBL |
| hsa-miR-942-5p | CASC10 |
| hsa-miR-942-5p | SKIDA1 |
| hsa-miR-942-5p | PIP4K2A |
| hsa-miR-942-5p | ARHGAP21 |
| hsa-miR-942-5p | YME1L1 |
| hsa-miR-942-5p | MPP7 |
| hsa-miR-942-5p | JCAD |
| hsa-miR-942-5p | EPC1 |
| hsa-miR-942-5p | CUL2 |
| hsa-miR-942-5p | ZNF248 |
| hsa-miR-942-5p | ZNF33B |
| hsa-miR-942-5p | CXCL12 |
| hsa-miR-942-5p | SGMS1 |
| hsa-miR-942-5p | ZWINT |
| hsa-miR-942-5p | SLC16A9 |
| hsa-miR-942-5p | JMJD1C |
| hsa-miR-942-5p | DNAJC12 |
| hsa-miR-942-5p | HERC4 |
| hsa-miR-942-5p | DNA2 |
| hsa-miR-942-5p | SAR1A |
| hsa-miR-942-5p | LRRC20 |
| hsa-miR-942-5p | SPOCK2 |
| hsa-miR-942-5p | MICU1 |
| hsa-miR-942-5p | USP54 |
| hsa-miR-942-5p | CAMK2G |
| hsa-miR-942-5p | POLR3A |
| hsa-miR-942-5p | ZCCHC24 |
| hsa-miR-942-5p | WAPL |
| hsa-miR-942-5p | MMRN2 |
| hsa-miR-942-5p | LIPA |
| hsa-miR-942-5p | PANK1 |
| hsa-miR-942-5p | ANKRD1 |
| hsa-miR-942-5p | FGFBP3 |
| hsa-miR-942-5p | NOC3L |
| hsa-miR-942-5p | TLL2 |
| hsa-miR-942-5p | TM9SF3 |
| hsa-miR-942-5p | ARHGAP19 |
| hsa-miR-942-5p | FRAT2 |
| hsa-miR-942-5p | MMS19 |
| hsa-miR-942-5p | DNMBP |
| hsa-miR-942-5p | ERLIN1 |
| hsa-miR-942-5p | CHUK |
| hsa-miR-942-5p | MGEA5 |
| hsa-miR-942-5p | C10orf76 |
| hsa-miR-942-5p | C10orf95 |
| hsa-miR-942-5p | ARL3 |
| hsa-miR-942-5p | PCGF6 |
| hsa-miR-942-5p | ATP5MD |
| hsa-miR-942-5p | SH3PXD2A |
| hsa-miR-942-5p | ZDHHC6 |
| hsa-miR-942-5p | CCDC186 |
| hsa-miR-942-5p | GFRA1 |
| hsa-miR-942-5p | PDZD8 |
| hsa-miR-942-5p | RAB11FIP2 |
| hsa-miR-942-5p | CACUL1 |
| hsa-miR-942-5p | EIF3A |
| hsa-miR-942-5p | SFXN4 |
| hsa-miR-942-5p | PRDX3 |
| hsa-miR-942-5p | FGFR2 |
| hsa-miR-942-5p | CPXM2 |
| hsa-miR-942-5p | EEF1AKMT2 |
| hsa-miR-942-5p | AC068896.1 |
| hsa-miR-942-5p | CTBP2 |
| hsa-miR-942-5p | PFKFB3 |
| hsa-miR-942-5p | TAF3 |
| hsa-miR-942-5p | CELF2 |
| hsa-miR-942-5p | CDC123 |
| hsa-miR-942-5p | MCM10 |
| hsa-miR-942-5p | SUV39H2 |
| hsa-miR-942-5p | OTUD1 |
| hsa-miR-942-5p | BAMBI |
| hsa-miR-942-5p | ZEB1 |
| hsa-miR-942-5p | CREM |
| hsa-miR-942-5p | ZNF37A |
| hsa-miR-942-5p | BMS1 |
| hsa-miR-942-5p | CSGALNACT2 |
| hsa-miR-942-5p | ZNF22 |
| hsa-miR-942-5p | MAPK8 |
| hsa-miR-942-5p | WDFY4 |
| hsa-miR-942-5p | NCOA4 |
| hsa-miR-942-5p | BICC1 |
| hsa-miR-942-5p | ARID5B |
| hsa-miR-942-5p | TET1 |
| hsa-miR-942-5p | CCAR1 |
| hsa-miR-942-5p | DDX21 |
| hsa-miR-942-5p | SRGN |
| hsa-miR-942-5p | H2AFY2 |
| hsa-miR-942-5p | EIF4EBP2 |
| hsa-miR-942-5p | SGPL1 |
| hsa-miR-942-5p | CHST3 |
| hsa-miR-942-5p | FUT11 |
| hsa-miR-942-5p | SAMD8 |
| hsa-miR-942-5p | ZMIZ1 |
| hsa-miR-942-5p | EIF5AL1 |
| hsa-miR-942-5p | TSPAN14 |
| hsa-miR-942-5p | GHITM |
| hsa-miR-942-5p | CCSER2 |
| hsa-miR-942-5p | BMPR1A |
| hsa-miR-942-5p | FAM35A |
| hsa-miR-942-5p | PAPSS2 |
| hsa-miR-942-5p | PTEN |
| hsa-miR-942-5p | FAS |
| hsa-miR-942-5p | KIF11 |
| hsa-miR-942-5p | EXOC6 |
| hsa-miR-942-5p | CEP55 |
| hsa-miR-942-5p | HELLS |
| hsa-miR-942-5p | CCNJ |
| hsa-miR-942-5p | ZNF518A |
| hsa-miR-942-5p | LCOR |
| hsa-miR-942-5p | FRAT1 |
| hsa-miR-942-5p | PGAM1 |
| hsa-miR-942-5p | PI4K2A |
| hsa-miR-942-5p | AL355315.1 |
| hsa-miR-942-5p | MARVELD1 |
| hsa-miR-942-5p | ZFYVE27 |
| hsa-miR-942-5p | CNNM1 |
| hsa-miR-942-5p | ENTPD7 |
| hsa-miR-942-5p | SCD |
| hsa-miR-942-5p | HIF1AN |
| hsa-miR-942-5p | SLF2 |
| hsa-miR-942-5p | BTRC |
| hsa-miR-942-5p | WBP1L |
| hsa-miR-942-5p | CNNM2 |
| hsa-miR-942-5p | PDCD11 |
| hsa-miR-942-5p | DUSP5 |
| hsa-miR-942-5p | VTI1A |
| hsa-miR-942-5p | TCF7L2 |
| hsa-miR-942-5p | CASP7 |
| hsa-miR-942-5p | NHLRC2 |
| hsa-miR-942-5p | AL162407.1 |
| hsa-miR-942-5p | TDRD1 |
| hsa-miR-942-5p | NANOS1 |
| hsa-miR-942-5p | BAG3 |
| hsa-miR-942-5p | SEC23IP |
| hsa-miR-942-5p | PLEKHA1 |
| hsa-miR-942-5p | ACADSB |
| hsa-miR-942-5p | BUB3 |
| hsa-miR-942-5p | ABRAXAS2 |
| hsa-miR-942-5p | EDRF1 |
| hsa-miR-942-5p | PTPRE |
| hsa-miR-942-5p | JAKMIP3 |
| hsa-miR-942-5p | ZNF511 |
| hsa-miR-942-5p | CYP2E1 |
| hsa-miR-942-5p | DEAF1 |
| hsa-miR-942-5p | TOLLIP |
| hsa-miR-942-5p | DUSP8 |
| hsa-miR-942-5p | IFITM10 |
| hsa-miR-942-5p | AC068580.4 |
| hsa-miR-942-5p | IGF2 |
| hsa-miR-942-5p | CDKN1C |
| hsa-miR-942-5p | CARS |
| hsa-miR-942-5p | RHOG |
| hsa-miR-942-5p | ARFIP2 |
| hsa-miR-942-5p | MRPL17 |
| hsa-miR-942-5p | TRIM66 |
| hsa-miR-942-5p | ST5 |
| hsa-miR-942-5p | BTBD10 |
| hsa-miR-942-5p | SAA2 |
| hsa-miR-942-5p | SPTY2D1 |
| hsa-miR-942-5p | LIN7C |
| hsa-miR-942-5p | MPPED2 |
| hsa-miR-942-5p | CSTF3 |
| hsa-miR-942-5p | CD59 |
| hsa-miR-942-5p | SLC1A2 |
| hsa-miR-942-5p | PAMR1 |
| hsa-miR-942-5p | TRAF6 |
| hsa-miR-942-5p | PHF21A |
| hsa-miR-942-5p | ARHGAP1 |
| hsa-miR-942-5p | CELF1 |
| hsa-miR-942-5p | TNKS1BP1 |
| hsa-miR-942-5p | CYB561A3 |
| hsa-miR-942-5p | CPSF7 |
| hsa-miR-942-5p | SYT7 |
| hsa-miR-942-5p | FADS1 |
| hsa-miR-942-5p | FADS3 |
| hsa-miR-942-5p | GANAB |
| hsa-miR-942-5p | LBHD1 |
| hsa-miR-942-5p | C11orf98 |
| hsa-miR-942-5p | AP001458.2 |
| hsa-miR-942-5p | SF1 |
| hsa-miR-942-5p | EHD1 |
| hsa-miR-942-5p | SYVN1 |
| hsa-miR-942-5p | FOSL1 |
| hsa-miR-942-5p | BRMS1 |
| hsa-miR-942-5p | B4GAT1 |
| hsa-miR-942-5p | SPTBN2 |
| hsa-miR-942-5p | SHANK2 |
| hsa-miR-942-5p | AP002495.1 |
| hsa-miR-942-5p | NUMA1 |
| hsa-miR-942-5p | LAMTOR1 |
| hsa-miR-942-5p | PGM2L1 |
| hsa-miR-942-5p | ARRB1 |
| hsa-miR-942-5p | LRRC32 |
| hsa-miR-942-5p | PAK1 |
| hsa-miR-942-5p | CLNS1A |
| hsa-miR-942-5p | RSF1 |
| hsa-miR-942-5p | KCTD21 |
| hsa-miR-942-5p | RAB30 |
| hsa-miR-942-5p | CREBZF |
| hsa-miR-942-5p | PICALM |
| hsa-miR-942-5p | FZD4 |
| hsa-miR-942-5p | CTSC |
| hsa-miR-942-5p | MTMR2 |
| hsa-miR-942-5p | PGR |
| hsa-miR-942-5p | TMEM123 |
| hsa-miR-942-5p | MMP3 |
| **hsa-miR-942-5p** | **MSANTD4** |
| hsa-miR-942-5p | KDELC2 |
| hsa-miR-942-5p | ARHGAP20 |
| hsa-miR-942-5p | ALG9 |
| hsa-miR-942-5p | ZW10 |
| hsa-miR-942-5p | BACE1 |
| hsa-miR-942-5p | DDX6 |
| hsa-miR-942-5p | HYOU1 |
| hsa-miR-942-5p | MCAM |
| hsa-miR-942-5p | THY1 |
| hsa-miR-942-5p | NECTIN1 |
| hsa-miR-942-5p | CLMP |
| hsa-miR-942-5p | ETS1 |
| hsa-miR-942-5p | ARHGAP32 |
| hsa-miR-942-5p | NCAPD3 |
| hsa-miR-942-5p | PKP3 |
| hsa-miR-942-5p | RASSF7 |
| hsa-miR-942-5p | RRM1 |
| hsa-miR-942-5p | ILK |
| hsa-miR-942-5p | TUB |
| hsa-miR-942-5p | SWAP70 |
| hsa-miR-942-5p | CTR9 |
| hsa-miR-942-5p | USP47 |
| hsa-miR-942-5p | FAR1 |
| hsa-miR-942-5p | KCNC1 |
| hsa-miR-942-5p | GTF2H1 |
| hsa-miR-942-5p | NAV2 |
| hsa-miR-942-5p | METTL15 |
| hsa-miR-942-5p | DNAJC24 |
| hsa-miR-942-5p | PRRG4 |
| hsa-miR-942-5p | QSER1 |
| hsa-miR-942-5p | DEPDC7 |
| hsa-miR-942-5p | CD44 |
| hsa-miR-942-5p | FJX1 |
| hsa-miR-942-5p | TSPAN18 |
| hsa-miR-942-5p | SLC35C1 |
| hsa-miR-942-5p | CRY2 |
| hsa-miR-942-5p | ATG13 |
| hsa-miR-942-5p | PTPRJ |
| hsa-miR-942-5p | ZDHHC5 |
| hsa-miR-942-5p | TMX2 |
| hsa-miR-942-5p | CTNND1 |
| hsa-miR-942-5p | ZFP91 |
| hsa-miR-942-5p | ZFP91-CNTF |
| hsa-miR-942-5p | CCDC86 |
| hsa-miR-942-5p | TMEM109 |
| hsa-miR-942-5p | FEN1 |
| hsa-miR-942-5p | FADS2 |
| hsa-miR-942-5p | NAA40 |
| hsa-miR-942-5p | STIP1 |
| hsa-miR-942-5p | TM7SF2 |
| hsa-miR-942-5p | POLA2 |
| hsa-miR-942-5p | KAT5 |
| hsa-miR-942-5p | OVOL1 |
| hsa-miR-942-5p | DRAP1 |
| hsa-miR-942-5p | RAB1B |
| hsa-miR-942-5p | BBS1 |
| hsa-miR-942-5p | AP002748.4 |
| hsa-miR-942-5p | RBM14-RBM4 |
| hsa-miR-942-5p | SYT12 |
| hsa-miR-942-5p | KDM2A |
| hsa-miR-942-5p | ALDH3B1 |
| hsa-miR-942-5p | CCND1 |
| hsa-miR-942-5p | PPFIA1 |
| hsa-miR-942-5p | RNF121 |
| hsa-miR-942-5p | LRTOMT |
| hsa-miR-942-5p | RELT |
| hsa-miR-942-5p | MRPL48 |
| hsa-miR-942-5p | POLD3 |
| hsa-miR-942-5p | RNF169 |
| hsa-miR-942-5p | SPCS2 |
| hsa-miR-942-5p | SERPINH1 |
| hsa-miR-942-5p | TSKU |
| hsa-miR-942-5p | DDIAS |
| hsa-miR-942-5p | PCF11 |
| hsa-miR-942-5p | EED |
| hsa-miR-942-5p | TMEM135 |
| hsa-miR-942-5p | FAT3 |
| hsa-miR-942-5p | FUT4 |
| hsa-miR-942-5p | AMOTL1 |
| hsa-miR-942-5p | ENDOD1 |
| hsa-miR-942-5p | CEP57 |
| hsa-miR-942-5p | ATM |
| hsa-miR-942-5p | FDX1 |
| hsa-miR-942-5p | NKAPD1 |
| hsa-miR-942-5p | NCAM1 |
| hsa-miR-942-5p | RBM7 |
| hsa-miR-942-5p | REXO2 |
| hsa-miR-942-5p | KMT2A |
| hsa-miR-942-5p | ARCN1 |
| hsa-miR-942-5p | HMBS |
| hsa-miR-942-5p | CBL |
| hsa-miR-942-5p | OAF |
| hsa-miR-942-5p | SORL1 |
| hsa-miR-942-5p | PANX3 |
| hsa-miR-942-5p | TBRG1 |
| hsa-miR-942-5p | EI24 |
| hsa-miR-942-5p | CHEK1 |
| hsa-miR-942-5p | HYLS1 |
| hsa-miR-942-5p | ST3GAL4 |
| hsa-miR-942-5p | BARX2 |
| hsa-miR-942-5p | APLP2 |
| hsa-miR-942-5p | NTM |
| hsa-miR-942-5p | JAM3 |
| hsa-miR-942-5p | KDM5A |
| hsa-miR-942-5p | FOXM1 |
| hsa-miR-942-5p | VAMP1 |
| hsa-miR-942-5p | MRPL51 |
| hsa-miR-942-5p | IFFO1 |
| hsa-miR-942-5p | ZNF384 |
| hsa-miR-942-5p | SLC2A14 |
| hsa-miR-942-5p | SLC2A3 |
| hsa-miR-942-5p | CD69 |
| hsa-miR-942-5p | LRP6 |
| hsa-miR-942-5p | DUSP16 |
| hsa-miR-942-5p | BCAT1 |
| hsa-miR-942-5p | ITPR2 |
| hsa-miR-942-5p | ERGIC2 |
| hsa-miR-942-5p | SINHCAF |
| hsa-miR-942-5p | DENND5B |
| hsa-miR-942-5p | PKP2 |
| hsa-miR-942-5p | KIF21A |
| hsa-miR-942-5p | SLC2A13 |
| hsa-miR-942-5p | GXYLT1 |
| hsa-miR-942-5p | YAF2 |
| hsa-miR-942-5p | SLC38A1 |
| hsa-miR-942-5p | SLC38A2 |
| hsa-miR-942-5p | HDAC7 |
| hsa-miR-942-5p | VDR |
| hsa-miR-942-5p | DDX23 |
| hsa-miR-942-5p | FMNL3 |
| hsa-miR-942-5p | SMAGP |
| hsa-miR-942-5p | KRT80 |
| hsa-miR-942-5p | RARG |
| hsa-miR-942-5p | CALCOCO1 |
| hsa-miR-942-5p | CBX5 |
| hsa-miR-942-5p | ITGA5 |
| hsa-miR-942-5p | ITGA7 |
| hsa-miR-942-5p | SMARCC2 |
| hsa-miR-942-5p | ANKRD52 |
| hsa-miR-942-5p | PAN2 |
| hsa-miR-942-5p | ZBTB39 |
| hsa-miR-942-5p | NEMP1 |
| hsa-miR-942-5p | STAT6 |
| hsa-miR-942-5p | CTDSP2 |
| hsa-miR-942-5p | GNS |
| hsa-miR-942-5p | CPM |
| hsa-miR-942-5p | KRR1 |
| hsa-miR-942-5p | PHLDA1 |
| hsa-miR-942-5p | NAP1L1 |
| hsa-miR-942-5p | OSBPL8 |
| hsa-miR-942-5p | E2F7 |
| hsa-miR-942-5p | PAWR |
| hsa-miR-942-5p | PPP1R12A |
| hsa-miR-942-5p | SLC6A15 |
| hsa-miR-942-5p | KITLG |
| hsa-miR-942-5p | POC1B |
| hsa-miR-942-5p | ATP2B1 |
| hsa-miR-942-5p | EEA1 |
| hsa-miR-942-5p | UBE2N |
| hsa-miR-942-5p | TMCC3 |
| hsa-miR-942-5p | HAL |
| hsa-miR-942-5p | IKBIP |
| hsa-miR-942-5p | GNPTAB |
| hsa-miR-942-5p | IGF1 |
| hsa-miR-942-5p | NT5DC3 |
| hsa-miR-942-5p | CKAP4 |
| hsa-miR-942-5p | PRDM4 |
| hsa-miR-942-5p | SART3 |
| hsa-miR-942-5p | CORO1C |
| hsa-miR-942-5p | SSH1 |
| hsa-miR-942-5p | MMAB |
| hsa-miR-942-5p | C12orf76 |
| hsa-miR-942-5p | ARPC3 |
| hsa-miR-942-5p | ATXN2 |
| hsa-miR-942-5p | SLC8B1 |
| hsa-miR-942-5p | RBM19 |
| hsa-miR-942-5p | MED13L |
| hsa-miR-942-5p | C12orf49 |
| hsa-miR-942-5p | HRK |
| hsa-miR-942-5p | KSR2 |
| hsa-miR-942-5p | VSIG10 |
| hsa-miR-942-5p | CIT |
| hsa-miR-942-5p | RAB35 |
| hsa-miR-942-5p | GCN1 |
| hsa-miR-942-5p | RPLP0 |
| hsa-miR-942-5p | PXN |
| hsa-miR-942-5p | MSI1 |
| hsa-miR-942-5p | C12orf43 |
| hsa-miR-942-5p | CAMKK2 |
| hsa-miR-942-5p | KDM2B |
| hsa-miR-942-5p | DIABLO |
| hsa-miR-942-5p | AC048338.1 |
| hsa-miR-942-5p | CLIP1 |
| hsa-miR-942-5p | MPHOSPH9 |
| hsa-miR-942-5p | CDK2AP1 |
| hsa-miR-942-5p | STX2 |
| hsa-miR-942-5p | POLE |
| hsa-miR-942-5p | ANKLE2 |
| hsa-miR-942-5p | GOLGA3 |
| hsa-miR-942-5p | CHFR |
| hsa-miR-942-5p | ZNF605 |
| hsa-miR-942-5p | WNK1 |
| hsa-miR-942-5p | ERC1 |
| hsa-miR-942-5p | ADIPOR2 |
| hsa-miR-942-5p | CCND2 |
| hsa-miR-942-5p | RAD51AP1 |
| hsa-miR-942-5p | NCAPD2 |
| hsa-miR-942-5p | CLSTN3 |
| hsa-miR-942-5p | FOXJ2 |
| hsa-miR-942-5p | RIMKLB |
| hsa-miR-942-5p | CDKN1B |
| hsa-miR-942-5p | FAM234B |
| hsa-miR-942-5p | EMP1 |
| hsa-miR-942-5p | STRAP |
| hsa-miR-942-5p | ETNK1 |
| hsa-miR-942-5p | LRMP |
| hsa-miR-942-5p | MED21 |
| hsa-miR-942-5p | PPFIBP1 |
| hsa-miR-942-5p | DDX11 |
| hsa-miR-942-5p | ETFBKMT |
| hsa-miR-942-5p | BICD1 |
| hsa-miR-942-5p | FGD4 |
| hsa-miR-942-5p | ALG10B |
| hsa-miR-942-5p | PPHLN1 |
| hsa-miR-942-5p | TMBIM6 |
| hsa-miR-942-5p | ASIC1 |
| hsa-miR-942-5p | SMARCD1 |
| hsa-miR-942-5p | LARP4 |
| hsa-miR-942-5p | ATF1 |
| hsa-miR-942-5p | METTL7A |
| hsa-miR-942-5p | ACVRL1 |
| hsa-miR-942-5p | ZNF740 |
| hsa-miR-942-5p | TARBP2 |
| hsa-miR-942-5p | HOXC9 |
| hsa-miR-942-5p | HOXC8 |
| hsa-miR-942-5p | HNRNPA1 |
| hsa-miR-942-5p | NCKAP1L |
| hsa-miR-942-5p | METTL7B |
| hsa-miR-942-5p | GDF11 |
| hsa-miR-942-5p | ORMDL2 |
| hsa-miR-942-5p | ESYT1 |
| hsa-miR-942-5p | COQ10A |
| hsa-miR-942-5p | SHMT2 |
| hsa-miR-942-5p | PIP4K2C |
| hsa-miR-942-5p | 9-Mar |
| hsa-miR-942-5p | MON2 |
| hsa-miR-942-5p | RXYLT1 |
| hsa-miR-942-5p | TBK1 |
| hsa-miR-942-5p | TBC1D30 |
| hsa-miR-942-5p | LEMD3 |
| hsa-miR-942-5p | MSRB3 |
| hsa-miR-942-5p | HMGA2 |
| hsa-miR-942-5p | HELB |
| hsa-miR-942-5p | CAND1 |
| hsa-miR-942-5p | DYRK2 |
| hsa-miR-942-5p | NUP107 |
| hsa-miR-942-5p | MDM2 |
| hsa-miR-942-5p | FRS2 |
| hsa-miR-942-5p | TMEM19 |
| hsa-miR-942-5p | TBC1D15 |
| hsa-miR-942-5p | NAV3 |
| hsa-miR-942-5p | SYT1 |
| hsa-miR-942-5p | TMTC2 |
| hsa-miR-942-5p | TMTC3 |
| hsa-miR-942-5p | ELK3 |
| hsa-miR-942-5p | NEDD1 |
| hsa-miR-942-5p | APAF1 |
| hsa-miR-942-5p | ACTR6 |
| hsa-miR-942-5p | SCYL2 |
| hsa-miR-942-5p | ANO4 |
| hsa-miR-942-5p | DRAM1 |
| hsa-miR-942-5p | PARPBP |
| hsa-miR-942-5p | HSP90B1 |
| hsa-miR-942-5p | WASHC4 |
| hsa-miR-942-5p | TMEM263 |
| hsa-miR-942-5p | ISCU |
| hsa-miR-942-5p | UNG |
| hsa-miR-942-5p | ACACB |
| hsa-miR-942-5p | FAM222A |
| hsa-miR-942-5p | TCHP |
| hsa-miR-942-5p | ATP2A2 |
| hsa-miR-942-5p | ERP29 |
| hsa-miR-942-5p | PTPN11 |
| hsa-miR-942-5p | OAS3 |
| hsa-miR-942-5p | SUDS3 |
| hsa-miR-942-5p | MLEC |
| hsa-miR-942-5p | UNC119B |
| hsa-miR-942-5p | P2RX4 |
| hsa-miR-942-5p | BCL7A |
| hsa-miR-942-5p | MLXIP |
| hsa-miR-942-5p | DENR |
| hsa-miR-942-5p | ATP6V0A2 |
| hsa-miR-942-5p | ZNF664 |
| hsa-miR-942-5p | TMEM132B |
| hsa-miR-942-5p | SFSWAP |
| hsa-miR-942-5p | ZNF84 |
| hsa-miR-942-5p | ZNF140 |
| hsa-miR-942-5p | ZNF268 |
| hsa-miR-942-5p | AC026786.1 |
| hsa-miR-942-5p | XPO4 |
| hsa-miR-942-5p | LATS2 |
| hsa-miR-942-5p | SKA3 |
| hsa-miR-942-5p | SACS |
| hsa-miR-942-5p | SLC7A1 |
| hsa-miR-942-5p | KATNAL1 |
| hsa-miR-942-5p | N4BP2L1 |
| hsa-miR-942-5p | SMAD9 |
| hsa-miR-942-5p | PROSER1 |
| hsa-miR-942-5p | FOXO1 |
| hsa-miR-942-5p | KBTBD6 |
| hsa-miR-942-5p | TSC22D1 |
| hsa-miR-942-5p | ZC3H13 |
| hsa-miR-942-5p | VPS36 |
| hsa-miR-942-5p | DIAPH3 |
| hsa-miR-942-5p | MZT1 |
| hsa-miR-942-5p | DIS3 |
| hsa-miR-942-5p | KLF12 |
| hsa-miR-942-5p | KCTD12 |
| hsa-miR-942-5p | FBXL3 |
| hsa-miR-942-5p | POU4F1 |
| hsa-miR-942-5p | RNF219 |
| hsa-miR-942-5p | RBM26 |
| hsa-miR-942-5p | SLITRK6 |
| hsa-miR-942-5p | TGDS |
| hsa-miR-942-5p | ZIC5 |
| hsa-miR-942-5p | EFNB2 |
| hsa-miR-942-5p | TUBGCP3 |
| hsa-miR-942-5p | RASA3 |
| hsa-miR-942-5p | MPHOSPH8 |
| hsa-miR-942-5p | ZMYM2 |
| hsa-miR-942-5p | TNFRSF19 |
| hsa-miR-942-5p | SPATA13 |
| hsa-miR-942-5p | PAN3 |
| hsa-miR-942-5p | BRCA2 |
| hsa-miR-942-5p | KL |
| hsa-miR-942-5p | NAA16 |
| hsa-miR-942-5p | DGKH |
| hsa-miR-942-5p | AKAP11 |
| hsa-miR-942-5p | LACC1 |
| hsa-miR-942-5p | COG3 |
| hsa-miR-942-5p | NUDT15 |
| hsa-miR-942-5p | FNDC3A |
| hsa-miR-942-5p | CDADC1 |
| hsa-miR-942-5p | SETDB2 |
| hsa-miR-942-5p | WDFY2 |
| hsa-miR-942-5p | UTP14C |
| hsa-miR-942-5p | CKAP2 |
| hsa-miR-942-5p | HNRNPA1L2 |
| hsa-miR-942-5p | PCDH17 |
| hsa-miR-942-5p | LMO7 |
| hsa-miR-942-5p | RAP2A |
| hsa-miR-942-5p | ERCC5 |
| hsa-miR-942-5p | BIVM-ERCC5 |
| hsa-miR-942-5p | NAXD |
| hsa-miR-942-5p | ATP11A |
| hsa-miR-942-5p | CUL4A |
| hsa-miR-942-5p | POTEG |
| hsa-miR-942-5p | TTC5 |
| hsa-miR-942-5p | ZNF219 |
| hsa-miR-942-5p | SUPT16H |
| hsa-miR-942-5p | SALL2 |
| hsa-miR-942-5p | PRMT5 |
| hsa-miR-942-5p | PPP1R3E |
| hsa-miR-942-5p | DHRS1 |
| hsa-miR-942-5p | HECTD1 |
| hsa-miR-942-5p | HEATR5A |
| hsa-miR-942-5p | AL139353.1 |
| hsa-miR-942-5p | EGLN3 |
| hsa-miR-942-5p | NFKBIA |
| hsa-miR-942-5p | MBIP |
| hsa-miR-942-5p | CLEC14A |
| hsa-miR-942-5p | TRAPPC6B |
| hsa-miR-942-5p | KLHL28 |
| hsa-miR-942-5p | NEMF |
| hsa-miR-942-5p | L2HGDH |
| hsa-miR-942-5p | NIN |
| hsa-miR-942-5p | PYGL |
| hsa-miR-942-5p | NID2 |
| hsa-miR-942-5p | GMFB |
| hsa-miR-942-5p | WDHD1 |
| hsa-miR-942-5p | EXOC5 |
| hsa-miR-942-5p | GPR135 |
| hsa-miR-942-5p | SIX4 |
| hsa-miR-942-5p | TRMT5 |
| hsa-miR-942-5p | PPP2R5E |
| hsa-miR-942-5p | WDR89 |
| hsa-miR-942-5p | RAB15 |
| hsa-miR-942-5p | MAX |
| hsa-miR-942-5p | ATP6V1D |
| hsa-miR-942-5p | RDH11 |
| hsa-miR-942-5p | ZFYVE26 |
| hsa-miR-942-5p | DCAF5 |
| hsa-miR-942-5p | SYNJ2BP |
| hsa-miR-942-5p | MAP3K9 |
| hsa-miR-942-5p | ZFYVE1 |
| hsa-miR-942-5p | ELMSAN1 |
| hsa-miR-942-5p | LTBP2 |
| hsa-miR-942-5p | AREL1 |
| hsa-miR-942-5p | RPS6KL1 |
| hsa-miR-942-5p | PGF |
| hsa-miR-942-5p | NEK9 |
| hsa-miR-942-5p | TMED10 |
| hsa-miR-942-5p | TMED8 |
| hsa-miR-942-5p | SPTLC2 |
| hsa-miR-942-5p | ALKBH1 |
| hsa-miR-942-5p | GTF2A1 |
| hsa-miR-942-5p | STON2 |
| hsa-miR-942-5p | EML5 |
| hsa-miR-942-5p | FOXN3 |
| hsa-miR-942-5p | NRDE2 |
| hsa-miR-942-5p | TTC7B |
| hsa-miR-942-5p | RPS6KA5 |
| hsa-miR-942-5p | CCDC88C |
| hsa-miR-942-5p | TC2N |
| hsa-miR-942-5p | FBLN5 |
| hsa-miR-942-5p | ATXN3 |
| hsa-miR-942-5p | LGMN |
| hsa-miR-942-5p | BTBD7 |
| hsa-miR-942-5p | DICER1 |
| hsa-miR-942-5p | BCL11B |
| hsa-miR-942-5p | DEGS2 |
| hsa-miR-942-5p | WARS |
| hsa-miR-942-5p | BAG5 |
| hsa-miR-942-5p | XRCC3 |
| hsa-miR-942-5p | AKT1 |
| hsa-miR-942-5p | ARHGEF40 |
| hsa-miR-942-5p | MMP14 |
| hsa-miR-942-5p | BCL2L2 |
| hsa-miR-942-5p | DCAF11 |
| hsa-miR-942-5p | AL136295.3 |
| hsa-miR-942-5p | PSME1 |
| hsa-miR-942-5p | NYNRIN |
| hsa-miR-942-5p | KHNYN |
| hsa-miR-942-5p | G2E3 |
| hsa-miR-942-5p | AP4S1 |
| hsa-miR-942-5p | PAX9 |
| hsa-miR-942-5p | MGAT2 |
| hsa-miR-942-5p | ARF6 |
| hsa-miR-942-5p | TMX1 |
| hsa-miR-942-5p | MAPK1IP1L |
| hsa-miR-942-5p | FBXO34 |
| hsa-miR-942-5p | ACTR10 |
| hsa-miR-942-5p | PSMA3 |
| hsa-miR-942-5p | ARID4A |
| hsa-miR-942-5p | JKAMP |
| hsa-miR-942-5p | PPM1A |
| hsa-miR-942-5p | RHOJ |
| hsa-miR-942-5p | SYNE2 |
| hsa-miR-942-5p | MTHFD1 |
| hsa-miR-942-5p | CHURC1-FNTB |
| hsa-miR-942-5p | CHURC1 |
| hsa-miR-942-5p | FUT8 |
| hsa-miR-942-5p | EXD2 |
| hsa-miR-942-5p | SLC39A9 |
| hsa-miR-942-5p | SUSD6 |
| hsa-miR-942-5p | SMOC1 |
| hsa-miR-942-5p | SIPA1L1 |
| hsa-miR-942-5p | DCAF4 |
| hsa-miR-942-5p | RBM25 |
| hsa-miR-942-5p | RIOX1 |
| hsa-miR-942-5p | ACOT4 |
| hsa-miR-942-5p | LIN52 |
| hsa-miR-942-5p | GPATCH2L |
| hsa-miR-942-5p | VASH1 |
| hsa-miR-942-5p | TMEM63C |
| hsa-miR-942-5p | CIPC |
| hsa-miR-942-5p | ZC3H14 |
| hsa-miR-942-5p | TTC8 |
| hsa-miR-942-5p | CALM1 |
| hsa-miR-942-5p | CCNK |
| hsa-miR-942-5p | YY1 |
| hsa-miR-942-5p | PPP2R5C |
| hsa-miR-942-5p | DYNC1H1 |
| hsa-miR-942-5p | WDR20 |
| hsa-miR-942-5p | ZNF839 |
| hsa-miR-942-5p | TECPR2 |
| hsa-miR-942-5p | RCOR1 |
| hsa-miR-942-5p | TRAF3 |
| hsa-miR-942-5p | NIPA1 |
| hsa-miR-942-5p | HERC2 |
| hsa-miR-942-5p | MTMR10 |
| hsa-miR-942-5p | GOLGA8A |
| hsa-miR-942-5p | GOLGA8B |
| hsa-miR-942-5p | ACTC1 |
| hsa-miR-942-5p | AQR |
| hsa-miR-942-5p | GPR176 |
| hsa-miR-942-5p | BMF |
| hsa-miR-942-5p | RMDN3 |
| hsa-miR-942-5p | INO80 |
| hsa-miR-942-5p | EHD4 |
| hsa-miR-942-5p | VPS39 |
| hsa-miR-942-5p | ZNF106 |
| hsa-miR-942-5p | LRRC57 |
| hsa-miR-942-5p | UBR1 |
| hsa-miR-942-5p | ZSCAN29 |
| hsa-miR-942-5p | SPG11 |
| hsa-miR-942-5p | SHF |
| hsa-miR-942-5p | FBN1 |
| hsa-miR-942-5p | CEP152 |
| hsa-miR-942-5p | SECISBP2L |
| hsa-miR-942-5p | COPS2 |
| hsa-miR-942-5p | GABPB1 |
| hsa-miR-942-5p | TRPM7 |
| hsa-miR-942-5p | MYO5C |
| hsa-miR-942-5p | MYO5A |
| hsa-miR-942-5p | FAM214A |
| hsa-miR-942-5p | PRTG |
| hsa-miR-942-5p | NEDD4 |
| hsa-miR-942-5p | RFX7 |
| hsa-miR-942-5p | SLTM |
| hsa-miR-942-5p | GTF2A2 |
| hsa-miR-942-5p | ICE2 |
| hsa-miR-942-5p | RORA |
| hsa-miR-942-5p | CA12 |
| hsa-miR-942-5p | CSNK1G1 |
| hsa-miR-942-5p | RBPMS2 |
| hsa-miR-942-5p | MTFMT |
| hsa-miR-942-5p | CLPX |
| hsa-miR-942-5p | DPP8 |
| hsa-miR-942-5p | INTS14 |
| hsa-miR-942-5p | CALML4 |
| hsa-miR-942-5p | AC107871.1 |
| hsa-miR-942-5p | ANP32A |
| hsa-miR-942-5p | THAP10 |
| hsa-miR-942-5p | CT62 |
| hsa-miR-942-5p | MYO9A |
| hsa-miR-942-5p | PKM |
| hsa-miR-942-5p | ADPGK |
| hsa-miR-942-5p | STOML1 |
| hsa-miR-942-5p | EDC3 |
| hsa-miR-942-5p | CYP1A1 |
| hsa-miR-942-5p | ULK3 |
| hsa-miR-942-5p | FAM219B |
| hsa-miR-942-5p | RPP25 |
| hsa-miR-942-5p | SIN3A |
| hsa-miR-942-5p | NRG4 |
| hsa-miR-942-5p | SCAPER |
| hsa-miR-942-5p | PEAK1 |
| hsa-miR-942-5p | MESD |
| hsa-miR-942-5p | BTBD1 |
| hsa-miR-942-5p | PEX11A |
| hsa-miR-942-5p | ARPIN |
| hsa-miR-942-5p | PRC1 |
| hsa-miR-942-5p | AC068831.7 |
| hsa-miR-942-5p | LYSMD4 |
| hsa-miR-942-5p | FAN1 |
| hsa-miR-942-5p | GREM1 |
| hsa-miR-942-5p | SPRED1 |
| hsa-miR-942-5p | C15orf53 |
| hsa-miR-942-5p | THBS1 |
| hsa-miR-942-5p | EIF2AK4 |
| hsa-miR-942-5p | BUB1B |
| hsa-miR-942-5p | SPINT1 |
| hsa-miR-942-5p | VPS18 |
| hsa-miR-942-5p | CHAC1 |
| hsa-miR-942-5p | RTF1 |
| hsa-miR-942-5p | HAUS2 |
| hsa-miR-942-5p | MAP1A |
| hsa-miR-942-5p | WDR76 |
| hsa-miR-942-5p | CTDSPL2 |
| hsa-miR-942-5p | TCF12 |
| hsa-miR-942-5p | GCOM1 |
| hsa-miR-942-5p | POLR2M |
| hsa-miR-942-5p | SNX1 |
| hsa-miR-942-5p | ZNF609 |
| hsa-miR-942-5p | PLEKHO2 |
| hsa-miR-942-5p | PIAS1 |
| hsa-miR-942-5p | PAQR5 |
| hsa-miR-942-5p | KIF23 |
| hsa-miR-942-5p | THSD4 |
| hsa-miR-942-5p | SENP8 |
| hsa-miR-942-5p | ARIH1 |
| hsa-miR-942-5p | BBS4 |
| hsa-miR-942-5p | ARID3B |
| hsa-miR-942-5p | CLK3 |
| hsa-miR-942-5p | SNX33 |
| hsa-miR-942-5p | RCN2 |
| hsa-miR-942-5p | HMG20A |
| hsa-miR-942-5p | IREB2 |
| hsa-miR-942-5p | TMED3 |
| hsa-miR-942-5p | CEMIP |
| hsa-miR-942-5p | WHAMM |
| hsa-miR-942-5p | AKAP13 |
| hsa-miR-942-5p | ABHD2 |
| hsa-miR-942-5p | ZNF710 |
| hsa-miR-942-5p | SEMA4B |
| hsa-miR-942-5p | NGRN |
| hsa-miR-942-5p | AC091167.2 |
| hsa-miR-942-5p | IQGAP1 |
| hsa-miR-942-5p | CRTC3 |
| hsa-miR-942-5p | MAN2A2 |
| hsa-miR-942-5p | CHD2 |
| hsa-miR-942-5p | IGF1R |
| hsa-miR-942-5p | LRRK1 |
| hsa-miR-942-5p | RHBDF1 |
| hsa-miR-942-5p | NPRL3 |
| hsa-miR-942-5p | LUC7L |
| hsa-miR-942-5p | TMEM8A |
| hsa-miR-942-5p | HAGH |
| hsa-miR-942-5p | CREBBP |
| hsa-miR-942-5p | ADCY9 |
| hsa-miR-942-5p | TFAP4 |
| hsa-miR-942-5p | UBALD1 |
| hsa-miR-942-5p | GLYR1 |
| hsa-miR-942-5p | PPL |
| hsa-miR-942-5p | USP7 |
| hsa-miR-942-5p | EMP2 |
| hsa-miR-942-5p | LITAF |
| hsa-miR-942-5p | RRN3 |
| hsa-miR-942-5p | MARF1 |
| hsa-miR-942-5p | FOPNL |
| hsa-miR-942-5p | XYLT1 |
| hsa-miR-942-5p | NOMO2 |
| hsa-miR-942-5p | ARL6IP1 |
| hsa-miR-942-5p | CDR2 |
| hsa-miR-942-5p | USP31 |
| hsa-miR-942-5p | COG7 |
| hsa-miR-942-5p | GGA2 |
| hsa-miR-942-5p | EARS2 |
| hsa-miR-942-5p | ZKSCAN2 |
| hsa-miR-942-5p | KCTD13 |
| hsa-miR-942-5p | ZNF768 |
| hsa-miR-942-5p | ZNF747 |
| hsa-miR-942-5p | NETO2 |
| hsa-miR-942-5p | AKTIP |
| hsa-miR-942-5p | NUDT21 |
| hsa-miR-942-5p | SLC38A7 |
| hsa-miR-942-5p | GOT2 |
| hsa-miR-942-5p | CDH11 |
| hsa-miR-942-5p | DYNC1LI2 |
| hsa-miR-942-5p | FHOD1 |
| hsa-miR-942-5p | ATP6V0D1 |
| hsa-miR-942-5p | RANBP10 |
| hsa-miR-942-5p | DDX28 |
| hsa-miR-942-5p | NQO1 |
| hsa-miR-942-5p | COG4 |
| hsa-miR-942-5p | ZNF23 |
| hsa-miR-942-5p | AC010547.4 |
| hsa-miR-942-5p | AP1G1 |
| hsa-miR-942-5p | TXNL4B |
| hsa-miR-942-5p | RFWD3 |
| hsa-miR-942-5p | FA2H |
| hsa-miR-942-5p | BCAR1 |
| hsa-miR-942-5p | KARS |
| hsa-miR-942-5p | MAF |
| hsa-miR-942-5p | CMC2 |
| hsa-miR-942-5p | HSDL1 |
| hsa-miR-942-5p | TAF1C |
| hsa-miR-942-5p | TLDC1 |
| hsa-miR-942-5p | COTL1 |
| hsa-miR-942-5p | ZDHHC7 |
| hsa-miR-942-5p | GINS2 |
| hsa-miR-942-5p | EMC8 |
| hsa-miR-942-5p | ZCCHC14 |
| hsa-miR-942-5p | SLC7A5 |
| hsa-miR-942-5p | MVD |
| hsa-miR-942-5p | PIEZO1 |
| hsa-miR-942-5p | ANKRD11 |
| hsa-miR-942-5p | SPATA2L |
| hsa-miR-942-5p | FANCA |
| hsa-miR-942-5p | CENPBD1 |
| hsa-miR-942-5p | DBNDD1 |
| hsa-miR-942-5p | MCRIP2 |
| hsa-miR-942-5p | CRAMP1 |
| hsa-miR-942-5p | AL031708.1 |
| hsa-miR-942-5p | JPT2 |
| hsa-miR-942-5p | FAHD1 |
| hsa-miR-942-5p | TRAF7 |
| hsa-miR-942-5p | E4F1 |
| hsa-miR-942-5p | PDPK1 |
| hsa-miR-942-5p | KCTD5 |
| hsa-miR-942-5p | ZG16B |
| hsa-miR-942-5p | ZNF174 |
| hsa-miR-942-5p | CLUAP1 |
| hsa-miR-942-5p | NUDT16L1 |
| hsa-miR-942-5p | ABAT |
| hsa-miR-942-5p | ATF7IP2 |
| hsa-miR-942-5p | RMI2 |
| hsa-miR-942-5p | SNX29 |
| hsa-miR-942-5p | PDXDC1 |
| hsa-miR-942-5p | MPV17L |
| hsa-miR-942-5p | ABCC1 |
| hsa-miR-942-5p | NOMO3 |
| hsa-miR-942-5p | ITPRIPL2 |
| hsa-miR-942-5p | MOSMO |
| hsa-miR-942-5p | EEF2K |
| hsa-miR-942-5p | POLR3E |
| hsa-miR-942-5p | UBFD1 |
| hsa-miR-942-5p | LCMT1 |
| hsa-miR-942-5p | SBK1 |
| hsa-miR-942-5p | SH2B1 |
| hsa-miR-942-5p | MAZ |
| hsa-miR-942-5p | ZNF48 |
| hsa-miR-942-5p | FBRS |
| hsa-miR-942-5p | RNF40 |
| hsa-miR-942-5p | ORAI3 |
| hsa-miR-942-5p | SETD1A |
| hsa-miR-942-5p | ITGAM |
| hsa-miR-942-5p | LONP2 |
| hsa-miR-942-5p | ADCY7 |
| hsa-miR-942-5p | NKD1 |
| hsa-miR-942-5p | CHD9 |
| hsa-miR-942-5p | FTO |
| hsa-miR-942-5p | MMP2 |
| hsa-miR-942-5p | POLR2C |
| hsa-miR-942-5p | CDH5 |
| hsa-miR-942-5p | C16orf70 |
| hsa-miR-942-5p | PLEKHG4 |
| hsa-miR-942-5p | NUTF2 |
| hsa-miR-942-5p | SLC7A6 |
| hsa-miR-942-5p | ZFP90 |
| hsa-miR-942-5p | CDH3 |
| hsa-miR-942-5p | CDH1 |
| hsa-miR-942-5p | TANGO6 |
| hsa-miR-942-5p | VPS4A |
| hsa-miR-942-5p | CYB5B |
| hsa-miR-942-5p | NFAT5 |
| hsa-miR-942-5p | SF3B3 |
| hsa-miR-942-5p | ATXN1L |
| hsa-miR-942-5p | PSMD7 |
| hsa-miR-942-5p | ZNRF1 |
| hsa-miR-942-5p | ZFP1 |
| hsa-miR-942-5p | TERF2IP |
| hsa-miR-942-5p | MON1B |
| hsa-miR-942-5p | CENPN |
| hsa-miR-942-5p | ATMIN |
| hsa-miR-942-5p | GAN |
| hsa-miR-942-5p | HSBP1 |
| hsa-miR-942-5p | MLYCD |
| hsa-miR-942-5p | USP10 |
| hsa-miR-942-5p | KIAA0513 |
| hsa-miR-942-5p | CDT1 |
| hsa-miR-942-5p | SPATA33 |
| hsa-miR-942-5p | ZNF276 |
| hsa-miR-942-5p | GAS8 |
| hsa-miR-942-5p | GEMIN4 |
| hsa-miR-942-5p | MYO1C |
| hsa-miR-942-5p | PITPNA |
| hsa-miR-942-5p | SLC43A2 |
| hsa-miR-942-5p | SMYD4 |
| hsa-miR-942-5p | RTN4RL1 |
| hsa-miR-942-5p | MNT |
| hsa-miR-942-5p | METTL16 |
| hsa-miR-942-5p | CLUH |
| hsa-miR-942-5p | SHPK |
| hsa-miR-942-5p | AC027796.3 |
| hsa-miR-942-5p | ZZEF1 |
| hsa-miR-942-5p | ANKFY1 |
| hsa-miR-942-5p | PELP1 |
| hsa-miR-942-5p | ZNF232 |
| hsa-miR-942-5p | ZNF594 |
| hsa-miR-942-5p | DHX33 |
| hsa-miR-942-5p | CTDNEP1 |
| hsa-miR-942-5p | YBX2 |
| hsa-miR-942-5p | ZBTB4 |
| hsa-miR-942-5p | FXR2 |
| hsa-miR-942-5p | TRAPPC1 |
| hsa-miR-942-5p | VAMP2 |
| hsa-miR-942-5p | MYH10 |
| hsa-miR-942-5p | MYH4 |
| hsa-miR-942-5p | ZNF18 |
| hsa-miR-942-5p | ZNF624 |
| hsa-miR-942-5p | RASD1 |
| hsa-miR-942-5p | SREBF1 |
| hsa-miR-942-5p | TOM1L2 |
| hsa-miR-942-5p | FLII |
| hsa-miR-942-5p | TOP3A |
| hsa-miR-942-5p | ZNF286B |
| hsa-miR-942-5p | USP22 |
| hsa-miR-942-5p | IFT20 |
| hsa-miR-942-5p | SLC46A1 |
| hsa-miR-942-5p | DHRS13 |
| hsa-miR-942-5p | MYO18A |
| hsa-miR-942-5p | TIAF1 |
| hsa-miR-942-5p | NUFIP2 |
| hsa-miR-942-5p | ABHD15 |
| hsa-miR-942-5p | SSH2 |
| hsa-miR-942-5p | BLMH |
| hsa-miR-942-5p | CCL15-CCL14 |
| hsa-miR-942-5p | CCL14 |
| hsa-miR-942-5p | ACACA |
| hsa-miR-942-5p | SYNRG |
| hsa-miR-942-5p | HNF1B |
| hsa-miR-942-5p | PIP4K2B |
| hsa-miR-942-5p | CWC25 |
| hsa-miR-942-5p | MED1 |
| hsa-miR-942-5p | IKZF3 |
| hsa-miR-942-5p | GSDMB |
| hsa-miR-942-5p | ORMDL3 |
| hsa-miR-942-5p | SMARCE1 |
| hsa-miR-942-5p | AC073508.2 |
| hsa-miR-942-5p | JUP |
| hsa-miR-942-5p | DNAJC7 |
| hsa-miR-942-5p | STAT5B |
| hsa-miR-942-5p | CAVIN1 |
| hsa-miR-942-5p | RETREG3 |
| hsa-miR-942-5p | EZH1 |
| hsa-miR-942-5p | PTGES3L-AARSD1 |
| hsa-miR-942-5p | AARSD1 |
| hsa-miR-942-5p | VAT1 |
| hsa-miR-942-5p | BRCA1 |
| hsa-miR-942-5p | DUSP3 |
| hsa-miR-942-5p | MPP2 |
| hsa-miR-942-5p | ATXN7L3 |
| hsa-miR-942-5p | GPATCH8 |
| hsa-miR-942-5p | GJC1 |
| hsa-miR-942-5p | EFTUD2 |
| hsa-miR-942-5p | PLCD3 |
| hsa-miR-942-5p | MAP3K14 |
| hsa-miR-942-5p | PLEKHM1 |
| hsa-miR-942-5p | KANSL1 |
| hsa-miR-942-5p | MRPL10 |
| hsa-miR-942-5p | CBX1 |
| hsa-miR-942-5p | ZNF652 |
| hsa-miR-942-5p | PHB |
| hsa-miR-942-5p | SPOP |
| hsa-miR-942-5p | ANKRD40 |
| hsa-miR-942-5p | COX11 |
| hsa-miR-942-5p | SRSF1 |
| hsa-miR-942-5p | MTMR4 |
| hsa-miR-942-5p | TEX14 |
| hsa-miR-942-5p | TRIM37 |
| hsa-miR-942-5p | SKA2 |
| hsa-miR-942-5p | BRIP1 |
| hsa-miR-942-5p | INTS2 |
| hsa-miR-942-5p | LIMD2 |
| hsa-miR-942-5p | AC046185.1 |
| hsa-miR-942-5p | STRADA |
| hsa-miR-942-5p | CCDC47 |
| hsa-miR-942-5p | TEX2 |
| hsa-miR-942-5p | DDX5 |
| hsa-miR-942-5p | SMURF2 |
| hsa-miR-942-5p | GNA13 |
| hsa-miR-942-5p | PSMD12 |
| hsa-miR-942-5p | ATP5PD |
| hsa-miR-942-5p | JPT1 |
| hsa-miR-942-5p | MIF4GD |
| hsa-miR-942-5p | ACOX1 |
| hsa-miR-942-5p | SRP68 |
| hsa-miR-942-5p | EXOC7 |
| hsa-miR-942-5p | SOCS3 |
| hsa-miR-942-5p | CYTH1 |
| hsa-miR-942-5p | USP36 |
| hsa-miR-942-5p | CANT1 |
| hsa-miR-942-5p | TBC1D16 |
| hsa-miR-942-5p | NPTX1 |
| hsa-miR-942-5p | ALYREF |
| hsa-miR-942-5p | MAFG |
| hsa-miR-942-5p | RAB40B |
| hsa-miR-942-5p | RPA1 |
| hsa-miR-942-5p | PAFAH1B1 |
| hsa-miR-942-5p | SPNS2 |
| hsa-miR-942-5p | PLD2 |
| hsa-miR-942-5p | KIF1C |
| hsa-miR-942-5p | ZFP3 |
| hsa-miR-942-5p | USP6 |
| hsa-miR-942-5p | RABEP1 |
| hsa-miR-942-5p | MIS12 |
| hsa-miR-942-5p | ELP5 |
| hsa-miR-942-5p | SLC2A4 |
| hsa-miR-942-5p | EIF5A |
| hsa-miR-942-5p | KDM6B |
| hsa-miR-942-5p | CHD3 |
| hsa-miR-942-5p | MAP2K4 |
| hsa-miR-942-5p | ADORA2B |
| hsa-miR-942-5p | GID4 |
| hsa-miR-942-5p | SMCR8 |
| hsa-miR-942-5p | MAP2K3 |
| hsa-miR-942-5p | MTRNR2L1 |
| hsa-miR-942-5p | WSB1 |
| hsa-miR-942-5p | TMEM97 |
| hsa-miR-942-5p | TMEM199 |
| hsa-miR-942-5p | TAOK1 |
| hsa-miR-942-5p | ANKRD13B |
| hsa-miR-942-5p | GOSR1 |
| hsa-miR-942-5p | RNF135 |
| hsa-miR-942-5p | NF1 |
| hsa-miR-942-5p | RAB11FIP4 |
| hsa-miR-942-5p | SUZ12 |
| hsa-miR-942-5p | RHBDL3 |
| hsa-miR-942-5p | ZNF207 |
| hsa-miR-942-5p | SLFN5 |
| hsa-miR-942-5p | RASL10B |
| hsa-miR-942-5p | AATF |
| hsa-miR-942-5p | TADA2A |
| hsa-miR-942-5p | MLLT6 |
| hsa-miR-942-5p | LASP1 |
| hsa-miR-942-5p | GRB7 |
| hsa-miR-942-5p | PSMD3 |
| hsa-miR-942-5p | THRA |
| hsa-miR-942-5p | MSL1 |
| hsa-miR-942-5p | RAPGEFL1 |
| hsa-miR-942-5p | WIPF2 |
| hsa-miR-942-5p | RARA |
| hsa-miR-942-5p | IGFBP4 |
| hsa-miR-942-5p | NKIRAS2 |
| hsa-miR-942-5p | ARL4D |
| hsa-miR-942-5p | NSF |
| hsa-miR-942-5p | ITGB3 |
| hsa-miR-942-5p | NPEPPS |
| hsa-miR-942-5p | PNPO |
| hsa-miR-942-5p | CDK5RAP3 |
| hsa-miR-942-5p | NFE2L1 |
| hsa-miR-942-5p | SNX11 |
| hsa-miR-942-5p | UBE2Z |
| hsa-miR-942-5p | IGF2BP1 |
| hsa-miR-942-5p | NGFR |
| hsa-miR-942-5p | KAT7 |
| hsa-miR-942-5p | ITGA3 |
| hsa-miR-942-5p | XYLT2 |
| hsa-miR-942-5p | RSAD1 |
| hsa-miR-942-5p | SPATA20 |
| hsa-miR-942-5p | ABCC3 |
| hsa-miR-942-5p | LUC7L3 |
| hsa-miR-942-5p | UTP18 |
| hsa-miR-942-5p | TOM1L1 |
| hsa-miR-942-5p | STXBP4 |
| hsa-miR-942-5p | PCTP |
| hsa-miR-942-5p | AKAP1 |
| hsa-miR-942-5p | PPM1E |
| hsa-miR-942-5p | BCAS3 |
| hsa-miR-942-5p | TBX2 |
| hsa-miR-942-5p | TANC2 |
| hsa-miR-942-5p | DCAF7 |
| hsa-miR-942-5p | CEP95 |
| hsa-miR-942-5p | PITPNC1 |
| hsa-miR-942-5p | PRKAR1A |
| hsa-miR-942-5p | KCNJ2 |
| hsa-miR-942-5p | SOX9 |
| hsa-miR-942-5p | COG1 |
| hsa-miR-942-5p | ARMC7 |
| hsa-miR-942-5p | NUP85 |
| hsa-miR-942-5p | TMEM94 |
| hsa-miR-942-5p | UNK |
| hsa-miR-942-5p | SPHK1 |
| hsa-miR-942-5p | 9-Sep |
| hsa-miR-942-5p | BIRC5 |
| hsa-miR-942-5p | ENGASE |
| hsa-miR-942-5p | GAA |
| hsa-miR-942-5p | SLC26A11 |
| hsa-miR-942-5p | RNF213 |
| hsa-miR-942-5p | BAIAP2 |
| hsa-miR-942-5p | CCDC137 |
| hsa-miR-942-5p | LPIN2 |
| hsa-miR-942-5p | DLGAP1 |
| hsa-miR-942-5p | PIEZO2 |
| hsa-miR-942-5p | FAM210A |
| hsa-miR-942-5p | CDH2 |
| hsa-miR-942-5p | B4GALT6 |
| hsa-miR-942-5p | TRAPPC8 |
| hsa-miR-942-5p | GAREM1 |
| hsa-miR-942-5p | NOL4 |
| hsa-miR-942-5p | ZNF24 |
| hsa-miR-942-5p | SLC39A6 |
| hsa-miR-942-5p | HDHD2 |
| hsa-miR-942-5p | AC012254.2 |
| hsa-miR-942-5p | SMAD2 |
| hsa-miR-942-5p | SMAD7 |
| hsa-miR-942-5p | MBD1 |
| hsa-miR-942-5p | TCF4 |
| hsa-miR-942-5p | ATP8B1 |
| hsa-miR-942-5p | RNF152 |
| hsa-miR-942-5p | BCL2 |
| hsa-miR-942-5p | MBP |
| hsa-miR-942-5p | USP14 |
| hsa-miR-942-5p | SMCHD1 |
| hsa-miR-942-5p | RALBP1 |
| hsa-miR-942-5p | RAB31 |
| hsa-miR-942-5p | GNAL |
| hsa-miR-942-5p | SEH1L |
| hsa-miR-942-5p | CEP192 |
| hsa-miR-942-5p | LDLRAD4 |
| hsa-miR-942-5p | RNMT |
| hsa-miR-942-5p | GREB1L |
| hsa-miR-942-5p | MIB1 |
| hsa-miR-942-5p | GATA6 |
| hsa-miR-942-5p | CABLES1 |
| hsa-miR-942-5p | IMPACT |
| hsa-miR-942-5p | RNF125 |
| hsa-miR-942-5p | MAPRE2 |
| hsa-miR-942-5p | GALNT1 |
| hsa-miR-942-5p | PIK3C3 |
| hsa-miR-942-5p | C18orf25 |
| hsa-miR-942-5p | ME2 |
| hsa-miR-942-5p | SMAD4 |
| hsa-miR-942-5p | POLI |
| hsa-miR-942-5p | ONECUT2 |
| hsa-miR-942-5p | NEDD4L |
| hsa-miR-942-5p | MALT1 |
| hsa-miR-942-5p | KIAA1468 |
| hsa-miR-942-5p | TNFRSF11A |
| hsa-miR-942-5p | CNDP2 |
| hsa-miR-942-5p | NFATC1 |
| hsa-miR-942-5p | C19orf25 |
| hsa-miR-942-5p | TCF3 |
| hsa-miR-942-5p | KLF16 |
| hsa-miR-942-5p | MOB3A |
| hsa-miR-942-5p | TIMM13 |
| hsa-miR-942-5p | LMNB2 |
| hsa-miR-942-5p | SGTA |
| hsa-miR-942-5p | AES |
| hsa-miR-942-5p | PIP5K1C |
| hsa-miR-942-5p | ZBTB7A |
| hsa-miR-942-5p | LONP1 |
| hsa-miR-942-5p | KHSRP |
| hsa-miR-942-5p | INSR |
| hsa-miR-942-5p | ELAVL1 |
| hsa-miR-942-5p | ZNF266 |
| hsa-miR-942-5p | ZNF426 |
| hsa-miR-942-5p | ZNF561 |
| hsa-miR-942-5p | DNMT1 |
| hsa-miR-942-5p | CDC37 |
| hsa-miR-942-5p | AP1M2 |
| hsa-miR-942-5p | KANK2 |
| hsa-miR-942-5p | ZNF823 |
| hsa-miR-942-5p | ZNF20 |
| hsa-miR-942-5p | ZNF625-ZNF20 |
| hsa-miR-942-5p | ZNF625 |
| hsa-miR-942-5p | AC008758.4 |
| hsa-miR-942-5p | ZNF564 |
| hsa-miR-942-5p | AC010422.6 |
| hsa-miR-942-5p | PRKACA |
| hsa-miR-942-5p | DDX39A |
| hsa-miR-942-5p | CHERP |
| hsa-miR-942-5p | SLC35E1 |
| hsa-miR-942-5p | BST2 |
| hsa-miR-942-5p | JUND |
| hsa-miR-942-5p | ELL |
| hsa-miR-942-5p | CRLF1 |
| hsa-miR-942-5p | ZNF208 |
| hsa-miR-942-5p | C19orf12 |
| hsa-miR-942-5p | ANKRD27 |
| hsa-miR-942-5p | CEP89 |
| hsa-miR-942-5p | CEBPA |
| hsa-miR-942-5p | ZNF566 |
| hsa-miR-942-5p | ZNF585B |
| hsa-miR-942-5p | ZNF569 |
| hsa-miR-942-5p | SARS2 |
| hsa-miR-942-5p | FBXO27 |
| hsa-miR-942-5p | EID2B |
| hsa-miR-942-5p | ZNF780B |
| hsa-miR-942-5p | ZNF780A |
| hsa-miR-942-5p | C19orf54 |
| hsa-miR-942-5p | CYP2A7 |
| hsa-miR-942-5p | POU2F2 |
| hsa-miR-942-5p | GSK3A |
| hsa-miR-942-5p | PLAUR |
| hsa-miR-942-5p | ZNF45 |
| hsa-miR-942-5p | ZNF229 |
| hsa-miR-942-5p | ZNF180 |
| hsa-miR-942-5p | IRF2BP1 |
| hsa-miR-942-5p | SULT2A1 |
| hsa-miR-942-5p | CARD8 |
| hsa-miR-942-5p | FUT1 |
| hsa-miR-942-5p | PIH1D1 |
| hsa-miR-942-5p | NUP62 |
| hsa-miR-942-5p | C19orf48 |
| hsa-miR-942-5p | ZNF614 |
| hsa-miR-942-5p | ZNF320 |
| hsa-miR-942-5p | ZNF468 |
| hsa-miR-942-5p | ZNF816-ZNF321P |
| hsa-miR-942-5p | PPP1R12C |
| hsa-miR-942-5p | PPP6R1 |
| hsa-miR-942-5p | ZNF772 |
| hsa-miR-942-5p | A1BG |
| hsa-miR-942-5p | CDC34 |
| hsa-miR-942-5p | PALM |
| hsa-miR-942-5p | MISP |
| hsa-miR-942-5p | ARHGAP45 |
| hsa-miR-942-5p | DAZAP1 |
| hsa-miR-942-5p | SF3A2 |
| hsa-miR-942-5p | OAZ1 |
| hsa-miR-942-5p | ZNF554 |
| hsa-miR-942-5p | NCLN |
| hsa-miR-942-5p | NFIC |
| hsa-miR-942-5p | CHAF1A |
| hsa-miR-942-5p | HDGFL2 |
| hsa-miR-942-5p | FEM1A |
| hsa-miR-942-5p | SAFB |
| hsa-miR-942-5p | ZNF317 |
| hsa-miR-942-5p | ZNF559 |
| hsa-miR-942-5p | PIN1 |
| hsa-miR-942-5p | C19orf66 |
| hsa-miR-942-5p | CARM1 |
| hsa-miR-942-5p | SMARCA4 |
| hsa-miR-942-5p | LDLR |
| hsa-miR-942-5p | ZNF441 |
| hsa-miR-942-5p | ZNF440 |
| hsa-miR-942-5p | ZNF763 |
| hsa-miR-942-5p | ZNF844 |
| hsa-miR-942-5p | ZNF136 |
| hsa-miR-942-5p | CALR |
| hsa-miR-942-5p | RAD23A |
| hsa-miR-942-5p | NFIX |
| hsa-miR-942-5p | NACC1 |
| hsa-miR-942-5p | IER2 |
| hsa-miR-942-5p | ZSWIM4 |
| hsa-miR-942-5p | ZNF333 |
| hsa-miR-942-5p | TPM4 |
| hsa-miR-942-5p | RAB8A |
| hsa-miR-942-5p | SIN3B |
| hsa-miR-942-5p | MYO9B |
| hsa-miR-942-5p | ARRDC2 |
| hsa-miR-942-5p | MAST3 |
| hsa-miR-942-5p | PIK3R2 |
| hsa-miR-942-5p | AC007192.1 |
| hsa-miR-942-5p | PGPEP1 |
| hsa-miR-942-5p | UPF1 |
| hsa-miR-942-5p | GATAD2A |
| hsa-miR-942-5p | ZNF493 |
| hsa-miR-942-5p | ZNF254 |
| hsa-miR-942-5p | URI1 |
| hsa-miR-942-5p | DPY19L3 |
| hsa-miR-942-5p | KCTD15 |
| hsa-miR-942-5p | ZNF302 |
| hsa-miR-942-5p | ZNF181 |
| hsa-miR-942-5p | APLP1 |
| hsa-miR-942-5p | SDHAF1 |
| hsa-miR-942-5p | WDR62 |
| hsa-miR-942-5p | ZNF146 |
| hsa-miR-942-5p | ZNF527 |
| hsa-miR-942-5p | MED29 |
| hsa-miR-942-5p | LTBP4 |
| hsa-miR-942-5p | RAB4B |
| hsa-miR-942-5p | MIA-RAB4B |
| hsa-miR-942-5p | RAB4B-EGLN2 |
| hsa-miR-942-5p | EGLN2 |
| hsa-miR-942-5p | CCDC97 |
| hsa-miR-942-5p | CIC |
| hsa-miR-942-5p | MEGF8 |
| hsa-miR-942-5p | ZNF223 |
| hsa-miR-942-5p | AC067968.1 |
| hsa-miR-942-5p | ZNF284 |
| hsa-miR-942-5p | ZNF226 |
| hsa-miR-942-5p | PVR |
| hsa-miR-942-5p | NECTIN2 |
| hsa-miR-942-5p | TOMM40 |
| hsa-miR-942-5p | CLASRP |
| hsa-miR-942-5p | VASP |
| hsa-miR-942-5p | ARHGAP35 |
| hsa-miR-942-5p | NUCB1 |
| hsa-miR-942-5p | PRR12 |
| hsa-miR-942-5p | AP2A1 |
| hsa-miR-942-5p | ATF5 |
| hsa-miR-942-5p | ZNF473 |
| hsa-miR-942-5p | PPP2R1A |
| hsa-miR-942-5p | ZNF480 |
| hsa-miR-942-5p | ZNF528 |
| hsa-miR-942-5p | ZNF331 |
| hsa-miR-942-5p | RPL28 |
| hsa-miR-942-5p | ZNF264 |
| hsa-miR-942-5p | ZNF460 |
| hsa-miR-942-5p | ZNF549 |
| hsa-miR-942-5p | ZIK1 |
| hsa-miR-942-5p | ZNF530 |
| hsa-miR-942-5p | ZNF551 |
| hsa-miR-942-5p | ZNF587 |
| hsa-miR-942-5p | ZNF544 |
| hsa-miR-942-5p | TMEM18 |
| hsa-miR-942-5p | PXDN |
| hsa-miR-942-5p | KIDINS220 |
| hsa-miR-942-5p | ROCK2 |
| hsa-miR-942-5p | E2F6 |
| hsa-miR-942-5p | SMC6 |
| hsa-miR-942-5p | SDC1 |
| hsa-miR-942-5p | HS1BP3 |
| hsa-miR-942-5p | LDAH |
| hsa-miR-942-5p | TP53I3 |
| hsa-miR-942-5p | DNAJC27 |
| hsa-miR-942-5p | DNMT3A |
| hsa-miR-942-5p | ASXL2 |
| hsa-miR-942-5p | HADHA |
| hsa-miR-942-5p | PREB |
| hsa-miR-942-5p | SLC5A6 |
| hsa-miR-942-5p | EIF2B4 |
| hsa-miR-942-5p | SUPT7L |
| hsa-miR-942-5p | EIF2AK2 |
| hsa-miR-942-5p | CDC42EP3 |
| hsa-miR-942-5p | ATL2 |
| hsa-miR-942-5p | HNRNPLL |
| hsa-miR-942-5p | DHX57 |
| hsa-miR-942-5p | SLC8A1 |
| hsa-miR-942-5p | LRPPRC |
| hsa-miR-942-5p | MCFD2 |
| hsa-miR-942-5p | NRXN1 |
| hsa-miR-942-5p | EFEMP1 |
| hsa-miR-942-5p | XPO1 |
| hsa-miR-942-5p | FAM161A |
| hsa-miR-942-5p | SERTAD2 |
| hsa-miR-942-5p | GFPT1 |
| hsa-miR-942-5p | AAK1 |
| hsa-miR-942-5p | TIA1 |
| hsa-miR-942-5p | FAM136A |
| hsa-miR-942-5p | TGFA |
| hsa-miR-942-5p | TEX261 |
| hsa-miR-942-5p | CYP26B1 |
| hsa-miR-942-5p | SFXN5 |
| hsa-miR-942-5p | DCTN1 |
| hsa-miR-942-5p | TGOLN2 |
| hsa-miR-942-5p | POLR1A |
| hsa-miR-942-5p | CHMP3 |
| hsa-miR-942-5p | RNF103-CHMP3 |
| hsa-miR-942-5p | KANSL3 |
| hsa-miR-942-5p | LMAN2L |
| hsa-miR-942-5p | ANKRD23 |
| hsa-miR-942-5p | ANKRD39 |
| hsa-miR-942-5p | SEMA4C |
| hsa-miR-942-5p | COA5 |
| hsa-miR-942-5p | MGAT4A |
| hsa-miR-942-5p | KIAA1211L |
| hsa-miR-942-5p | LONRF2 |
| hsa-miR-942-5p | ST6GAL2 |
| hsa-miR-942-5p | CKAP2L |
| hsa-miR-942-5p | PAX8 |
| hsa-miR-942-5p | CCDC93 |
| hsa-miR-942-5p | TFCP2L1 |
| hsa-miR-942-5p | NIFK |
| hsa-miR-942-5p | MAP3K2 |
| hsa-miR-942-5p | HS6ST1 |
| hsa-miR-942-5p | FAM168B |
| hsa-miR-942-5p | LYPD1 |
| hsa-miR-942-5p | NCKAP5 |
| hsa-miR-942-5p | ZEB2 |
| hsa-miR-942-5p | RND3 |
| hsa-miR-942-5p | ARL5A |
| hsa-miR-942-5p | AC068547.1 |
| hsa-miR-942-5p | PRPF40A |
| hsa-miR-942-5p | FIGN |
| hsa-miR-942-5p | COBLL1 |
| hsa-miR-942-5p | GALNT3 |
| hsa-miR-942-5p | TTC21B |
| hsa-miR-942-5p | ABCB11 |
| hsa-miR-942-5p | TLK1 |
| hsa-miR-942-5p | SP3 |
| hsa-miR-942-5p | CIR1 |
| hsa-miR-942-5p | TTC30A |
| hsa-miR-942-5p | FKBP7 |
| hsa-miR-942-5p | SESTD1 |
| hsa-miR-942-5p | SLC40A1 |
| hsa-miR-942-5p | ORMDL1 |
| hsa-miR-942-5p | NEMP2 |
| hsa-miR-942-5p | STAT1 |
| hsa-miR-942-5p | STK17B |
| hsa-miR-942-5p | HECW2 |
| hsa-miR-942-5p | GTF3C3 |
| hsa-miR-942-5p | HSPD1 |
| hsa-miR-942-5p | SATB2 |
| hsa-miR-942-5p | PPIL3 |
| hsa-miR-942-5p | ORC2 |
| hsa-miR-942-5p | FAM126B |
| hsa-miR-942-5p | TRAK2 |
| hsa-miR-942-5p | ALS2 |
| hsa-miR-942-5p | INO80D |
| hsa-miR-942-5p | KLF7 |
| hsa-miR-942-5p | ERBB4 |
| hsa-miR-942-5p | IKZF2 |
| hsa-miR-942-5p | ABCA12 |
| hsa-miR-942-5p | FN1 |
| hsa-miR-942-5p | MREG |
| hsa-miR-942-5p | IGFBP5 |
| hsa-miR-942-5p | TNS1 |
| hsa-miR-942-5p | USP37 |
| hsa-miR-942-5p | ZNF142 |
| hsa-miR-942-5p | DNPEP |
| hsa-miR-942-5p | EPHA4 |
| hsa-miR-942-5p | PAX3 |
| hsa-miR-942-5p | WDFY1 |
| hsa-miR-942-5p | DNER |
| hsa-miR-942-5p | GPR55 |
| hsa-miR-942-5p | ARL4C |
| hsa-miR-942-5p | MTERF4 |
| hsa-miR-942-5p | TPO |
| hsa-miR-942-5p | SOX11 |
| hsa-miR-942-5p | TAF1B |
| hsa-miR-942-5p | RRM2 |
| hsa-miR-942-5p | GREB1 |
| hsa-miR-942-5p | TRIB2 |
| hsa-miR-942-5p | RHOB |
| hsa-miR-942-5p | KLHL29 |
| hsa-miR-942-5p | UBXN2A |
| hsa-miR-942-5p | RAB10 |
| hsa-miR-942-5p | SELENOI |
| hsa-miR-942-5p | SLC35F6 |
| hsa-miR-942-5p | CENPA |
| hsa-miR-942-5p | SLC4A1AP |
| hsa-miR-942-5p | MRPL33 |
| hsa-miR-942-5p | BABAM2 |
| hsa-miR-942-5p | PPP1CB |
| hsa-miR-942-5p | YPEL5 |
| hsa-miR-942-5p | SPAST |
| hsa-miR-942-5p | SLC30A6 |
| hsa-miR-942-5p | CRIM1 |
| hsa-miR-942-5p | GPATCH11 |
| hsa-miR-942-5p | CEBPZOS |
| hsa-miR-942-5p | MORN2 |
| hsa-miR-942-5p | ARHGEF33 |
| hsa-miR-942-5p | EML4 |
| hsa-miR-942-5p | EPAS1 |
| hsa-miR-942-5p | RHOQ |
| hsa-miR-942-5p | SOCS5 |
| hsa-miR-942-5p | MSH6 |
| hsa-miR-942-5p | FOXN2 |
| hsa-miR-942-5p | PPP1R21 |
| hsa-miR-942-5p | SPTBN1 |
| hsa-miR-942-5p | OTX1 |
| hsa-miR-942-5p | AFTPH |
| hsa-miR-942-5p | SLC1A4 |
| hsa-miR-942-5p | APLF |
| hsa-miR-942-5p | ANTXR1 |
| hsa-miR-942-5p | ZNF638 |
| hsa-miR-942-5p | SPR |
| hsa-miR-942-5p | ALMS1 |
| hsa-miR-942-5p | ACTG2 |
| hsa-miR-942-5p | TET3 |
| hsa-miR-942-5p | TTC31 |
| hsa-miR-942-5p | HK2 |
| hsa-miR-942-5p | DNAH6 |
| hsa-miR-942-5p | KCMF1 |
| hsa-miR-942-5p | MAT2A |
| hsa-miR-942-5p | VAMP5 |
| hsa-miR-942-5p | ATOH8 |
| hsa-miR-942-5p | PTCD3 |
| hsa-miR-942-5p | MRPL35 |
| hsa-miR-942-5p | KDM3A |
| hsa-miR-942-5p | RMND5A |
| hsa-miR-942-5p | RGPD1 |
| hsa-miR-942-5p | PROM2 |
| hsa-miR-942-5p | FAHD2A |
| hsa-miR-942-5p | CNNM4 |
| hsa-miR-942-5p | CNNM3 |
| hsa-miR-942-5p | MRPL30 |
| hsa-miR-942-5p | NPAS2 |
| hsa-miR-942-5p | RPL31 |
| hsa-miR-942-5p | CNOT11 |
| hsa-miR-942-5p | MAP4K4 |
| hsa-miR-942-5p | FLJ20373 |
| hsa-miR-942-5p | IL1R1 |
| hsa-miR-942-5p | SLC9A2 |
| hsa-miR-942-5p | NCK2 |
| hsa-miR-942-5p | GCC2 |
| hsa-miR-942-5p | LIMS1 |
| hsa-miR-942-5p | RANBP2 |
| hsa-miR-942-5p | SOWAHC |
| hsa-miR-942-5p | TTL |
| hsa-miR-942-5p | STEAP3 |
| hsa-miR-942-5p | EPB41L5 |
| hsa-miR-942-5p | INHBB |
| hsa-miR-942-5p | GLI2 |
| hsa-miR-942-5p | TSN |
| hsa-miR-942-5p | PTPN18 |
| hsa-miR-942-5p | PLEKHB2 |
| hsa-miR-942-5p | POTEE |
| hsa-miR-942-5p | R3HDM1 |
| hsa-miR-942-5p | UBXN4 |
| hsa-miR-942-5p | SPOPL |
| hsa-miR-942-5p | LYPD6 |
| hsa-miR-942-5p | PKP4 |
| hsa-miR-942-5p | TANC1 |
| hsa-miR-942-5p | 7-Mar |
| hsa-miR-942-5p | SLC4A10 |
| hsa-miR-942-5p | CERS6 |
| hsa-miR-942-5p | PPIG |
| hsa-miR-942-5p | SSB |
| hsa-miR-942-5p | UBR3 |
| hsa-miR-942-5p | GAD1 |
| hsa-miR-942-5p | CYBRD1 |
| hsa-miR-942-5p | HAT1 |
| hsa-miR-942-5p | MAP3K20 |
| hsa-miR-942-5p | CDCA7 |
| hsa-miR-942-5p | HNRNPA3 |
| hsa-miR-942-5p | AGPS |
| hsa-miR-942-5p | OSBPL6 |
| hsa-miR-942-5p | SSFA2 |
| hsa-miR-942-5p | ZC3H15 |
| hsa-miR-942-5p | ITGAV |
| hsa-miR-942-5p | WDR75 |
| hsa-miR-942-5p | PMS1 |
| hsa-miR-942-5p | NAB1 |
| hsa-miR-942-5p | SLC39A10 |
| hsa-miR-942-5p | MOB4 |
| hsa-miR-942-5p | BZW1 |
| hsa-miR-942-5p | FZD7 |
| hsa-miR-942-5p | BMPR2 |
| hsa-miR-942-5p | CARF |
| hsa-miR-942-5p | NBEAL1 |
| hsa-miR-942-5p | PIKFYVE |
| hsa-miR-942-5p | ATIC |
| hsa-miR-942-5p | VIL1 |
| hsa-miR-942-5p | TTLL4 |
| hsa-miR-942-5p | CYP27A1 |
| hsa-miR-942-5p | AGFG1 |
| hsa-miR-942-5p | SP100 |
| hsa-miR-942-5p | ITM2C |
| hsa-miR-942-5p | PSMD1 |
| hsa-miR-942-5p | ALPI |
| hsa-miR-942-5p | EIF4E2 |
| hsa-miR-942-5p | GIGYF2 |
| hsa-miR-942-5p | ATG16L1 |
| hsa-miR-942-5p | DGKD |
| hsa-miR-942-5p | UGT1A6 |
| hsa-miR-942-5p | UGT1A5 |
| hsa-miR-942-5p | UGT1A9 |
| hsa-miR-942-5p | UGT1A1 |
| hsa-miR-942-5p | UGT1A8 |
| hsa-miR-942-5p | UGT1A10 |
| hsa-miR-942-5p | UGT1A3 |
| hsa-miR-942-5p | UGT1A7 |
| hsa-miR-942-5p | UGT1A4 |
| hsa-miR-942-5p | SH3BP4 |
| hsa-miR-942-5p | AGAP1 |
| hsa-miR-942-5p | KLHL30 |
| hsa-miR-942-5p | ASB1 |
| hsa-miR-942-5p | GPC1 |
| hsa-miR-942-5p | ING5 |
| hsa-miR-942-5p | TBC1D20 |
| hsa-miR-942-5p | CSNK2A1 |
| hsa-miR-942-5p | ZNF343 |
| hsa-miR-942-5p | LZTS3 |
| hsa-miR-942-5p | CENPB |
| hsa-miR-942-5p | RASSF2 |
| hsa-miR-942-5p | SLC23A2 |
| hsa-miR-942-5p | GPCPD1 |
| hsa-miR-942-5p | FERMT1 |
| hsa-miR-942-5p | TMX4 |
| hsa-miR-942-5p | RRBP1 |
| hsa-miR-942-5p | RBBP9 |
| hsa-miR-942-5p | CRNKL1 |
| hsa-miR-942-5p | NKX2-4 |
| hsa-miR-942-5p | FOXA2 |
| hsa-miR-942-5p | THBD |
| hsa-miR-942-5p | NAPB |
| hsa-miR-942-5p | CST3 |
| hsa-miR-942-5p | PLAGL2 |
| hsa-miR-942-5p | CDK5RAP1 |
| hsa-miR-942-5p | PXMP4 |
| hsa-miR-942-5p | AHCY |
| hsa-miR-942-5p | PIGU |
| hsa-miR-942-5p | UQCC1 |
| hsa-miR-942-5p | RBM12 |
| hsa-miR-942-5p | RBM39 |
| hsa-miR-942-5p | SOGA1 |
| hsa-miR-942-5p | TGM2 |
| hsa-miR-942-5p | MAFB |
| hsa-miR-942-5p | ZHX3 |
| hsa-miR-942-5p | EMILIN3 |
| hsa-miR-942-5p | CHD6 |
| hsa-miR-942-5p | JPH2 |
| hsa-miR-942-5p | OSER1 |
| hsa-miR-942-5p | SERINC3 |
| hsa-miR-942-5p | TOMM34 |
| hsa-miR-942-5p | SDC4 |
| hsa-miR-942-5p | ELMO2 |
| hsa-miR-942-5p | SLC13A3 |
| hsa-miR-942-5p | TP53RK |
| hsa-miR-942-5p | ZMYND8 |
| hsa-miR-942-5p | SPATA2 |
| hsa-miR-942-5p | TMEM189 |
| hsa-miR-942-5p | ADNP |
| hsa-miR-942-5p | ATP9A |
| hsa-miR-942-5p | ZNF217 |
| hsa-miR-942-5p | BCAS1 |
| hsa-miR-942-5p | TAF4 |
| hsa-miR-942-5p | DIDO1 |
| hsa-miR-942-5p | GMEB2 |
| hsa-miR-942-5p | ZNF512B |
| hsa-miR-942-5p | SAMD10 |
| hsa-miR-942-5p | ZCCHC3 |
| hsa-miR-942-5p | STK35 |
| hsa-miR-942-5p | EBF4 |
| hsa-miR-942-5p | SMOX |
| hsa-miR-942-5p | CDS2 |
| hsa-miR-942-5p | CHGB |
| hsa-miR-942-5p | PLCB1 |
| hsa-miR-942-5p | BTBD3 |
| hsa-miR-942-5p | PCSK2 |
| hsa-miR-942-5p | SLC24A3 |
| hsa-miR-942-5p | RIN2 |
| hsa-miR-942-5p | XRN2 |
| hsa-miR-942-5p | GINS1 |
| hsa-miR-942-5p | TPX2 |
| hsa-miR-942-5p | TM9SF4 |
| hsa-miR-942-5p | POFUT1 |
| hsa-miR-942-5p | KIF3B |
| hsa-miR-942-5p | CBFA2T2 |
| hsa-miR-942-5p | ACTL10 |
| hsa-miR-942-5p | TP53INP2 |
| hsa-miR-942-5p | PHF20 |
| hsa-miR-942-5p | AAR2 |
| hsa-miR-942-5p | MYL9 |
| hsa-miR-942-5p | TGIF2 |
| hsa-miR-942-5p | RPN2 |
| hsa-miR-942-5p | RALGAPB |
| hsa-miR-942-5p | PPP1R16B |
| hsa-miR-942-5p | TOP1 |
| hsa-miR-942-5p | PLCG1 |
| hsa-miR-942-5p | SRSF6 |
| hsa-miR-942-5p | PKIG |
| hsa-miR-942-5p | WISP2 |
| hsa-miR-942-5p | YWHAB |
| hsa-miR-942-5p | STK4 |
| hsa-miR-942-5p | SYS1 |
| hsa-miR-942-5p | DBNDD2 |
| hsa-miR-942-5p | SYS1-DBNDD2 |
| hsa-miR-942-5p | SNX21 |
| hsa-miR-942-5p | ARFGEF2 |
| hsa-miR-942-5p | RNF114 |
| hsa-miR-942-5p | PTPN1 |
| hsa-miR-942-5p | PARD6B |
| hsa-miR-942-5p | FAM210B |
| hsa-miR-942-5p | RBM38 |
| hsa-miR-942-5p | PCK1 |
| hsa-miR-942-5p | RAB22A |
| hsa-miR-942-5p | VAPB |
| hsa-miR-942-5p | NPEPL1 |
| hsa-miR-942-5p | GNAS |
| hsa-miR-942-5p | FAM217B |
| hsa-miR-942-5p | SS18L1 |
| hsa-miR-942-5p | GID8 |
| hsa-miR-942-5p | ARFGAP1 |
| hsa-miR-942-5p | TPD52L2 |
| hsa-miR-942-5p | DNAJC5 |
| hsa-miR-942-5p | PCMTD2 |
| hsa-miR-942-5p | NRIP1 |
| hsa-miR-942-5p | APP |
| hsa-miR-942-5p | ADAMTS5 |
| hsa-miR-942-5p | URB1 |
| hsa-miR-942-5p | PAXBP1 |
| hsa-miR-942-5p | TMEM50B |
| hsa-miR-942-5p | DONSON |
| hsa-miR-942-5p | RCAN1 |
| hsa-miR-942-5p | RUNX1 |
| hsa-miR-942-5p | PIGP |
| hsa-miR-942-5p | ERG |
| hsa-miR-942-5p | BRWD1 |
| hsa-miR-942-5p | PRDM15 |
| hsa-miR-942-5p | C2CD2 |
| hsa-miR-942-5p | ZBTB21 |
| hsa-miR-942-5p | CBS |
| hsa-miR-942-5p | CBSL |
| hsa-miR-942-5p | SIK1 |
| hsa-miR-942-5p | SIK1B |
| hsa-miR-942-5p | PTTG1IP |
| hsa-miR-942-5p | POFUT2 |
| hsa-miR-942-5p | SPATC1L |
| hsa-miR-942-5p | NCAM2 |
| hsa-miR-942-5p | GABPA |
| hsa-miR-942-5p | IFNAR1 |
| hsa-miR-942-5p | SON |
| hsa-miR-942-5p | ITSN1 |
| hsa-miR-942-5p | SLC5A3 |
| hsa-miR-942-5p | MRPS6 |
| hsa-miR-942-5p | TTC3 |
| hsa-miR-942-5p | DYRK1A |
| hsa-miR-942-5p | ETS2 |
| hsa-miR-942-5p | PCP4 |
| hsa-miR-942-5p | ABCG1 |
| hsa-miR-942-5p | PKNOX1 |
| hsa-miR-942-5p | RRP1B |
| hsa-miR-942-5p | PDXK |
| hsa-miR-942-5p | TRAPPC10 |
| hsa-miR-942-5p | FP565260.7 |
| hsa-miR-942-5p | ADARB1 |
| hsa-miR-942-5p | BID |
| hsa-miR-942-5p | DGCR2 |
| hsa-miR-942-5p | HIRA |
| hsa-miR-942-5p | C22orf39 |
| hsa-miR-942-5p | RTL10 |
| hsa-miR-942-5p | MAPK1 |
| hsa-miR-942-5p | PPM1F |
| hsa-miR-942-5p | TOP3B |
| hsa-miR-942-5p | GUCD1 |
| hsa-miR-942-5p | XBP1 |
| hsa-miR-942-5p | THOC5 |
| hsa-miR-942-5p | ASCC2 |
| hsa-miR-942-5p | LIF |
| hsa-miR-942-5p | OSM |
| hsa-miR-942-5p | PES1 |
| hsa-miR-942-5p | PIK3IP1 |
| hsa-miR-942-5p | PATZ1 |
| hsa-miR-942-5p | PRR14L |
| hsa-miR-942-5p | RBFOX2 |
| hsa-miR-942-5p | MYH9 |
| hsa-miR-942-5p | IL2RB |
| hsa-miR-942-5p | C1QTNF6 |
| hsa-miR-942-5p | TMEM184B |
| hsa-miR-942-5p | CSNK1E |
| hsa-miR-942-5p | JOSD1 |
| hsa-miR-942-5p | NPTXR |
| hsa-miR-942-5p | PDGFB |
| hsa-miR-942-5p | SLC25A17 |
| hsa-miR-942-5p | TOB2 |
| hsa-miR-942-5p | PHF5A |
| hsa-miR-942-5p | POLR3H |
| hsa-miR-942-5p | TCF20 |
| hsa-miR-942-5p | POLDIP3 |
| hsa-miR-942-5p | SHISAL1 |
| hsa-miR-942-5p | CELSR1 |
| hsa-miR-942-5p | CERK |
| hsa-miR-942-5p | BRD1 |
| hsa-miR-942-5p | ALG12 |
| hsa-miR-942-5p | BCL2L13 |
| hsa-miR-942-5p | MED15 |
| hsa-miR-942-5p | CRKL |
| hsa-miR-942-5p | HIC2 |
| hsa-miR-942-5p | UBE2L3 |
| hsa-miR-942-5p | SPECC1L |
| hsa-miR-942-5p | SPECC1L-ADORA2A |
| hsa-miR-942-5p | SGSM1 |
| hsa-miR-942-5p | CCDC117 |
| hsa-miR-942-5p | NEFH |
| hsa-miR-942-5p | NF2 |
| hsa-miR-942-5p | MTMR3 |
| hsa-miR-942-5p | YWHAH |
| hsa-miR-942-5p | HMGXB4 |
| hsa-miR-942-5p | MPST |
| hsa-miR-942-5p | CDC42EP1 |
| hsa-miR-942-5p | TRIOBP |
| hsa-miR-942-5p | H1F0 |
| hsa-miR-942-5p | MAFF |
| hsa-miR-942-5p | CBY1 |
| hsa-miR-942-5p | TOMM22 |
| hsa-miR-942-5p | GTPBP1 |
| hsa-miR-942-5p | SYNGR1 |
| hsa-miR-942-5p | MGAT3 |
| hsa-miR-942-5p | MIEF1 |
| hsa-miR-942-5p | CACNA1I |
| hsa-miR-942-5p | TNRC6B |
| hsa-miR-942-5p | XPNPEP3 |
| hsa-miR-942-5p | TEF |
| hsa-miR-942-5p | C22orf46 |
| hsa-miR-942-5p | PPARA |
| hsa-miR-942-5p | GRAMD4 |
| hsa-miR-942-5p | PANX2 |
| hsa-miR-942-5p | RAD18 |
| hsa-miR-942-5p | ATP2B2 |
| hsa-miR-942-5p | TAMM41 |
| hsa-miR-942-5p | RAF1 |
| hsa-miR-942-5p | XPC |
| hsa-miR-942-5p | MRPS25 |
| hsa-miR-942-5p | RBSN |
| hsa-miR-942-5p | SH3BP5 |
| hsa-miR-942-5p | ANKRD28 |
| hsa-miR-942-5p | TBC1D5 |
| hsa-miR-942-5p | THRB |
| hsa-miR-942-5p | TOP2B |
| hsa-miR-942-5p | NGLY1 |
| hsa-miR-942-5p | SLC4A7 |
| hsa-miR-942-5p | OSBPL10 |
| hsa-miR-942-5p | TMPPE |
| hsa-miR-942-5p | UBP1 |
| hsa-miR-942-5p | CLASP2 |
| hsa-miR-942-5p | TRANK1 |
| hsa-miR-942-5p | ACAA1 |
| hsa-miR-942-5p | CYP8B1 |
| hsa-miR-942-5p | POMGNT2 |
| hsa-miR-942-5p | ZNF445 |
| hsa-miR-942-5p | ZDHHC3 |
| hsa-miR-942-5p | CDCP1 |
| hsa-miR-942-5p | TMEM158 |
| hsa-miR-942-5p | FYCO1 |
| hsa-miR-942-5p | SMARCC1 |
| hsa-miR-942-5p | MAP4 |
| hsa-miR-942-5p | CDC25A |
| hsa-miR-942-5p | PFKFB4 |
| hsa-miR-942-5p | SLC26A6 |
| hsa-miR-942-5p | CELSR3 |
| hsa-miR-942-5p | QARS |
| hsa-miR-942-5p | IP6K1 |
| hsa-miR-942-5p | HYAL1 |
| hsa-miR-942-5p | RASSF1 |
| hsa-miR-942-5p | PBRM1 |
| hsa-miR-942-5p | RFT1 |
| hsa-miR-942-5p | DCP1A |
| hsa-miR-942-5p | FAM208A |
| hsa-miR-942-5p | ARHGEF3 |
| hsa-miR-942-5p | IL17RD |
| hsa-miR-942-5p | FAM107A |
| hsa-miR-942-5p | PRICKLE2 |
| hsa-miR-942-5p | MAGI1 |
| hsa-miR-942-5p | TMF1 |
| hsa-miR-942-5p | EIF4E3 |
| hsa-miR-942-5p | SHQ1 |
| hsa-miR-942-5p | ROBO1 |
| hsa-miR-942-5p | VGLL3 |
| hsa-miR-942-5p | SENP7 |
| hsa-miR-942-5p | ZBTB11 |
| hsa-miR-942-5p | CBLB |
| hsa-miR-942-5p | CD47 |
| hsa-miR-942-5p | CD200R1 |
| hsa-miR-942-5p | NEPRO |
| hsa-miR-942-5p | USF3 |
| hsa-miR-942-5p | NAA50 |
| hsa-miR-942-5p | ZBTB20 |
| hsa-miR-942-5p | B4GALT4 |
| hsa-miR-942-5p | TMEM39A |
| hsa-miR-942-5p | GSK3B |
| hsa-miR-942-5p | GPR156 |
| hsa-miR-942-5p | FSTL1 |
| hsa-miR-942-5p | POLQ |
| hsa-miR-942-5p | GOLGB1 |
| hsa-miR-942-5p | IQCB1 |
| hsa-miR-942-5p | KPNA1 |
| hsa-miR-942-5p | MYLK |
| hsa-miR-942-5p | ITGB5 |
| hsa-miR-942-5p | HEG1 |
| hsa-miR-942-5p | ZNF148 |
| hsa-miR-942-5p | SNX4 |
| hsa-miR-942-5p | SLC41A3 |
| hsa-miR-942-5p | KLF15 |
| hsa-miR-942-5p | MGLL |
| hsa-miR-942-5p | ISY1 |
| hsa-miR-942-5p | ACAD11 |
| hsa-miR-942-5p | NPHP3-ACAD11 |
| hsa-miR-942-5p | AMOTL2 |
| hsa-miR-942-5p | ANAPC13 |
| hsa-miR-942-5p | MSL2 |
| hsa-miR-942-5p | STAG1 |
| hsa-miR-942-5p | DZIP1L |
| hsa-miR-942-5p | GK5 |
| hsa-miR-942-5p | XRN1 |
| hsa-miR-942-5p | PLOD2 |
| hsa-miR-942-5p | HLTF |
| hsa-miR-942-5p | DHX36 |
| hsa-miR-942-5p | C3orf33 |
| hsa-miR-942-5p | AC104472.3 |
| hsa-miR-942-5p | SLC33A1 |
| hsa-miR-942-5p | SSR3 |
| hsa-miR-942-5p | B3GALNT1 |
| hsa-miR-942-5p | PDCD10 |
| hsa-miR-942-5p | GOLIM4 |
| hsa-miR-942-5p | MECOM |
| hsa-miR-942-5p | PHC3 |
| hsa-miR-942-5p | TNIK |
| hsa-miR-942-5p | PLD1 |
| hsa-miR-942-5p | TBL1XR1 |
| hsa-miR-942-5p | GNB4 |
| hsa-miR-942-5p | MCCC1 |
| hsa-miR-942-5p | ABCC5 |
| hsa-miR-942-5p | IGF2BP2 |
| hsa-miR-942-5p | TRA2B |
| hsa-miR-942-5p | ETV5 |
| hsa-miR-942-5p | MASP1 |
| hsa-miR-942-5p | MB21D2 |
| hsa-miR-942-5p | ATP13A3 |
| hsa-miR-942-5p | XXYLT1 |
| hsa-miR-942-5p | UBXN7 |
| hsa-miR-942-5p | RUBCN |
| hsa-miR-942-5p | ITPR1 |
| hsa-miR-942-5p | BHLHE40 |
| hsa-miR-942-5p | EDEM1 |
| hsa-miR-942-5p | LMCD1 |
| hsa-miR-942-5p | SETD5 |
| hsa-miR-942-5p | VHL |
| hsa-miR-942-5p | PPARG |
| hsa-miR-942-5p | TMEM43 |
| hsa-miR-942-5p | SLC6A6 |
| hsa-miR-942-5p | EAF1 |
| hsa-miR-942-5p | KCNH8 |
| hsa-miR-942-5p | NR1D2 |
| hsa-miR-942-5p | TGFBR2 |
| hsa-miR-942-5p | STT3B |
| hsa-miR-942-5p | GPD1L |
| hsa-miR-942-5p | PDCD6IP |
| hsa-miR-942-5p | GOLGA4 |
| hsa-miR-942-5p | OXSR1 |
| hsa-miR-942-5p | XYLB |
| hsa-miR-942-5p | ACVR2B |
| hsa-miR-942-5p | EXOG |
| hsa-miR-942-5p | ENTPD3 |
| hsa-miR-942-5p | ZNF620 |
| hsa-miR-942-5p | TRAK1 |
| hsa-miR-942-5p | NKTR |
| hsa-miR-942-5p | ZBTB47 |
| hsa-miR-942-5p | SNRK |
| hsa-miR-942-5p | ZNF35 |
| hsa-miR-942-5p | KIF15 |
| hsa-miR-942-5p | LIMD1 |
| hsa-miR-942-5p | KLHL18 |
| hsa-miR-942-5p | ZNF589 |
| hsa-miR-942-5p | ATRIP |
| hsa-miR-942-5p | DAG1 |
| hsa-miR-942-5p | APEH |
| hsa-miR-942-5p | SEMA3F |
| hsa-miR-942-5p | GNAI2 |
| hsa-miR-942-5p | HEMK1 |
| hsa-miR-942-5p | MANF |
| hsa-miR-942-5p | RBM15B |
| hsa-miR-942-5p | CCDC66 |
| hsa-miR-942-5p | APPL1 |
| hsa-miR-942-5p | FLNB |
| hsa-miR-942-5p | RPP14 |
| hsa-miR-942-5p | HTD2 |
| hsa-miR-942-5p | ATXN7 |
| hsa-miR-942-5p | SLC25A26 |
| hsa-miR-942-5p | KBTBD8 |
| hsa-miR-942-5p | ARL6IP5 |
| hsa-miR-942-5p | GPR27 |
| hsa-miR-942-5p | PPP4R2 |
| hsa-miR-942-5p | ARL13B |
| hsa-miR-942-5p | CMSS1 |
| hsa-miR-942-5p | PCNP |
| hsa-miR-942-5p | CD96 |
| hsa-miR-942-5p | PHLDB2 |
| hsa-miR-942-5p | SLC35A5 |
| hsa-miR-942-5p | ATP6V1A |
| hsa-miR-942-5p | QTRT2 |
| hsa-miR-942-5p | ARHGAP31 |
| hsa-miR-942-5p | DIRC2 |
| hsa-miR-942-5p | SEC22A |
| hsa-miR-942-5p | PLXNA1 |
| hsa-miR-942-5p | SEC61A1 |
| hsa-miR-942-5p | NUDT16 |
| hsa-miR-942-5p | DNAJC13 |
| hsa-miR-942-5p | CDV3 |
| hsa-miR-942-5p | TF |
| hsa-miR-942-5p | SLC25A36 |
| hsa-miR-942-5p | ATP1B3 |
| hsa-miR-942-5p | C3orf58 |
| hsa-miR-942-5p | AGTR1 |
| hsa-miR-942-5p | TSC22D2 |
| hsa-miR-942-5p | MBNL1 |
| hsa-miR-942-5p | RAP2B |
| hsa-miR-942-5p | ARHGEF26 |
| hsa-miR-942-5p | MME |
| hsa-miR-942-5p | PTX3 |
| hsa-miR-942-5p | GFM1 |
| hsa-miR-942-5p | C3orf80 |
| hsa-miR-942-5p | SMC4 |
| hsa-miR-942-5p | PPM1L |
| hsa-miR-942-5p | NMD3 |
| hsa-miR-942-5p | PRKCI |
| hsa-miR-942-5p | FNDC3B |
| hsa-miR-942-5p | USP13 |
| hsa-miR-942-5p | TTC14 |
| hsa-miR-942-5p | FXR1 |
| hsa-miR-942-5p | B3GNT5 |
| hsa-miR-942-5p | YEATS2 |
| hsa-miR-942-5p | PSMD2 |
| hsa-miR-942-5p | EIF4G1 |
| hsa-miR-942-5p | VPS8 |
| hsa-miR-942-5p | DNAJB11 |
| hsa-miR-942-5p | KNG1 |
| hsa-miR-942-5p | ST6GAL1 |
| hsa-miR-942-5p | LPP |
| hsa-miR-942-5p | TP63 |
| hsa-miR-942-5p | IL1RAP |
| hsa-miR-942-5p | CCDC50 |
| hsa-miR-942-5p | HES1 |
| hsa-miR-942-5p | FBXO45 |
| hsa-miR-942-5p | PIGX |
| hsa-miR-942-5p | PAK2 |
| hsa-miR-942-5p | SENP5 |
| hsa-miR-942-5p | FYTTD1 |
| hsa-miR-942-5p | ZNF721 |
| hsa-miR-942-5p | DGKQ |
| hsa-miR-942-5p | SPON2 |
| hsa-miR-942-5p | LETM1 |
| hsa-miR-942-5p | PPP2R2C |
| hsa-miR-942-5p | MRFAP1L1 |
| hsa-miR-942-5p | AFAP1 |
| hsa-miR-942-5p | ACOX3 |
| hsa-miR-942-5p | WDR1 |
| hsa-miR-942-5p | BOD1L1 |
| hsa-miR-942-5p | FBXL5 |
| hsa-miR-942-5p | TAPT1 |
| hsa-miR-942-5p | DCAF16 |
| hsa-miR-942-5p | PPARGC1A |
| hsa-miR-942-5p | PDS5A |
| hsa-miR-942-5p | RBM47 |
| hsa-miR-942-5p | APBB2 |
| hsa-miR-942-5p | GNPDA2 |
| hsa-miR-942-5p | USP46 |
| hsa-miR-942-5p | CLOCK |
| hsa-miR-942-5p | AASDH |
| hsa-miR-942-5p | CENPC |
| hsa-miR-942-5p | YTHDC1 |
| hsa-miR-942-5p | ANKRD17 |
| hsa-miR-942-5p | CXCL2 |
| hsa-miR-942-5p | G3BP2 |
| hsa-miR-942-5p | NUP54 |
| hsa-miR-942-5p | SCARB2 |
| hsa-miR-942-5p | CNOT6L |
| hsa-miR-942-5p | TMEM150C |
| hsa-miR-942-5p | LIN54 |
| hsa-miR-942-5p | NKX6-1 |
| hsa-miR-942-5p | PPM1K |
| hsa-miR-942-5p | PYURF |
| hsa-miR-942-5p | FAM13A |
| hsa-miR-942-5p | TSPAN5 |
| hsa-miR-942-5p | EIF4E |
| hsa-miR-942-5p | ADH5 |
| hsa-miR-942-5p | UBE2D3 |
| hsa-miR-942-5p | CENPE |
| hsa-miR-942-5p | SEC24D |
| hsa-miR-942-5p | ANKRD50 |
| hsa-miR-942-5p | MFSD8 |
| hsa-miR-942-5p | PGRMC2 |
| hsa-miR-942-5p | SETD7 |
| hsa-miR-942-5p | OTUD4 |
| hsa-miR-942-5p | SH3D19 |
| hsa-miR-942-5p | GATB |
| hsa-miR-942-5p | TMEM154 |
| hsa-miR-942-5p | FGA |
| hsa-miR-942-5p | C4orf46 |
| hsa-miR-942-5p | TMEM192 |
| hsa-miR-942-5p | SH3RF1 |
| hsa-miR-942-5p | MFAP3L |
| hsa-miR-942-5p | DCTD |
| hsa-miR-942-5p | IRF2 |
| hsa-miR-942-5p | CASP3 |
| hsa-miR-942-5p | CFAP97 |
| hsa-miR-942-5p | PDLIM3 |
| hsa-miR-942-5p | ZNF141 |
| hsa-miR-942-5p | FGFRL1 |
| hsa-miR-942-5p | UVSSA |
| hsa-miR-942-5p | NSD2 |
| hsa-miR-942-5p | NAT8L |
| hsa-miR-942-5p | FAM193A |
| hsa-miR-942-5p | ADD1 |
| hsa-miR-942-5p | GRK4 |
| hsa-miR-942-5p | HTT |
| hsa-miR-942-5p | EVC |
| hsa-miR-942-5p | MRFAP1 |
| hsa-miR-942-5p | TADA2B |
| hsa-miR-942-5p | CPEB2 |
| hsa-miR-942-5p | LAP3 |
| hsa-miR-942-5p | NCAPG |
| hsa-miR-942-5p | PI4K2B |
| hsa-miR-942-5p | TBC1D19 |
| hsa-miR-942-5p | STIM2 |
| hsa-miR-942-5p | PGM2 |
| hsa-miR-942-5p | KLF3 |
| hsa-miR-942-5p | N4BP2 |
| hsa-miR-942-5p | TMEM33 |
| hsa-miR-942-5p | DCAF4L1 |
| hsa-miR-942-5p | NIPAL1 |
| hsa-miR-942-5p | PDGFRA |
| hsa-miR-942-5p | AC058822.1 |
| hsa-miR-942-5p | EXOC1 |
| hsa-miR-942-5p | SRP72 |
| hsa-miR-942-5p | MOB1B |
| hsa-miR-942-5p | CXCL1 |
| hsa-miR-942-5p | EREG |
| hsa-miR-942-5p | STBD1 |
| hsa-miR-942-5p | FAM47E-STBD1 |
| hsa-miR-942-5p | FRAS1 |
| hsa-miR-942-5p | ARHGAP24 |
| hsa-miR-942-5p | AFF1 |
| hsa-miR-942-5p | PDLIM5 |
| hsa-miR-942-5p | METAP1 |
| hsa-miR-942-5p | TET2 |
| hsa-miR-942-5p | NPNT |
| hsa-miR-942-5p | CYP2U1 |
| hsa-miR-942-5p | HADH |
| hsa-miR-942-5p | SEC24B |
| hsa-miR-942-5p | LARP7 |
| hsa-miR-942-5p | ANK2 |
| hsa-miR-942-5p | EXOSC9 |
| hsa-miR-942-5p | FGF2 |
| hsa-miR-942-5p | JADE1 |
| hsa-miR-942-5p | PCDH10 |
| hsa-miR-942-5p | NAA15 |
| hsa-miR-942-5p | USP38 |
| hsa-miR-942-5p | SMARCA5 |
| hsa-miR-942-5p | HHIP |
| hsa-miR-942-5p | LSM6 |
| hsa-miR-942-5p | FNIP2 |
| hsa-miR-942-5p | RAPGEF2 |
| hsa-miR-942-5p | KLHL2 |
| hsa-miR-942-5p | TLL1 |
| hsa-miR-942-5p | CLCN3 |
| hsa-miR-942-5p | CEP44 |
| hsa-miR-942-5p | WWC2 |
| hsa-miR-942-5p | STOX2 |
| hsa-miR-942-5p | FRG1 |
| hsa-miR-942-5p | ZDHHC11 |
| hsa-miR-942-5p | LPCAT1 |
| hsa-miR-942-5p | IRX2 |
| hsa-miR-942-5p | FAM173B |
| hsa-miR-942-5p | DAP |
| hsa-miR-942-5p | CTNND2 |
| hsa-miR-942-5p | RETREG1 |
| hsa-miR-942-5p | MYO10 |
| hsa-miR-942-5p | MTMR12 |
| hsa-miR-942-5p | RAD1 |
| hsa-miR-942-5p | PRLR |
| hsa-miR-942-5p | C5orf42 |
| hsa-miR-942-5p | NUP155 |
| hsa-miR-942-5p | LIFR |
| hsa-miR-942-5p | RPL37 |
| hsa-miR-942-5p | OXCT1 |
| hsa-miR-942-5p | TMEM267 |
| hsa-miR-942-5p | ESM1 |
| hsa-miR-942-5p | CCNO |
| hsa-miR-942-5p | MIER3 |
| hsa-miR-942-5p | PLK2 |
| hsa-miR-942-5p | ELOVL7 |
| hsa-miR-942-5p | DIMT1 |
| hsa-miR-942-5p | TRIM23 |
| hsa-miR-942-5p | SGTB |
| hsa-miR-942-5p | GTF2H2 |
| hsa-miR-942-5p | ENC1 |
| hsa-miR-942-5p | ZBED3 |
| hsa-miR-942-5p | ARSB |
| hsa-miR-942-5p | DMGDH |
| hsa-miR-942-5p | HOMER1 |
| hsa-miR-942-5p | TMEM167A |
| hsa-miR-942-5p | CCNH |
| hsa-miR-942-5p | MBLAC2 |
| hsa-miR-942-5p | LYSMD3 |
| hsa-miR-942-5p | ARRDC3 |
| hsa-miR-942-5p | POU5F2 |
| hsa-miR-942-5p | TTC37 |
| hsa-miR-942-5p | FBXL17 |
| hsa-miR-942-5p | STARD4 |
| hsa-miR-942-5p | REEP5 |
| hsa-miR-942-5p | TRIM36 |
| hsa-miR-942-5p | CEP120 |
| hsa-miR-942-5p | ALDH7A1 |
| hsa-miR-942-5p | C5orf63 |
| hsa-miR-942-5p | FNIP1 |
| hsa-miR-942-5p | AC008695.1 |
| hsa-miR-942-5p | IRF1 |
| hsa-miR-942-5p | KIF3A |
| hsa-miR-942-5p | AFF4 |
| hsa-miR-942-5p | VDAC1 |
| hsa-miR-942-5p | SKP1 |
| hsa-miR-942-5p | PPP2CA |
| hsa-miR-942-5p | SPOCK1 |
| hsa-miR-942-5p | HNRNPA0 |
| hsa-miR-942-5p | BRD8 |
| hsa-miR-942-5p | CDC23 |
| hsa-miR-942-5p | ETF1 |
| hsa-miR-942-5p | HBEGF |
| hsa-miR-942-5p | DIAPH1 |
| hsa-miR-942-5p | YIPF5 |
| hsa-miR-942-5p | DPYSL3 |
| hsa-miR-942-5p | JAKMIP2 |
| hsa-miR-942-5p | SH3TC2 |
| hsa-miR-942-5p | CSNK1A1 |
| hsa-miR-942-5p | CD74 |
| hsa-miR-942-5p | TNIP1 |
| hsa-miR-942-5p | FAM114A2 |
| hsa-miR-942-5p | FAXDC2 |
| hsa-miR-942-5p | MED7 |
| hsa-miR-942-5p | ADAM19 |
| hsa-miR-942-5p | RNF145 |
| hsa-miR-942-5p | PWWP2A |
| hsa-miR-942-5p | CCNJL |
| hsa-miR-942-5p | ZBED8 |
| hsa-miR-942-5p | FBXW11 |
| hsa-miR-942-5p | UBTD2 |
| hsa-miR-942-5p | SH3PXD2B |
| hsa-miR-942-5p | STC2 |
| hsa-miR-942-5p | BOD1 |
| hsa-miR-942-5p | CLTB |
| hsa-miR-942-5p | UIMC1 |
| hsa-miR-942-5p | PDLIM7 |
| hsa-miR-942-5p | DDX41 |
| hsa-miR-942-5p | PHYKPL |
| hsa-miR-942-5p | GFPT2 |
| hsa-miR-942-5p | MGAT1 |
| hsa-miR-942-5p | AHRR |
| hsa-miR-942-5p | ICE1 |
| hsa-miR-942-5p | PAPD7 |
| hsa-miR-942-5p | 6-Mar |
| hsa-miR-942-5p | OTULIN |
| hsa-miR-942-5p | C5orf22 |
| hsa-miR-942-5p | RAI14 |
| hsa-miR-942-5p | DNAJC21 |
| hsa-miR-942-5p | IL7R |
| hsa-miR-942-5p | PTGER4 |
| hsa-miR-942-5p | ZNF131 |
| hsa-miR-942-5p | MAP3K1 |
| hsa-miR-942-5p | IPO11 |
| hsa-miR-942-5p | PPWD1 |
| hsa-miR-942-5p | ERBIN |
| hsa-miR-942-5p | SREK1 |
| hsa-miR-942-5p | PIK3R1 |
| hsa-miR-942-5p | MARVELD2 |
| hsa-miR-942-5p | MAP1B |
| hsa-miR-942-5p | PTCD2 |
| hsa-miR-942-5p | TNPO1 |
| hsa-miR-942-5p | UTP15 |
| hsa-miR-942-5p | HMGCR |
| hsa-miR-942-5p | F2RL1 |
| hsa-miR-942-5p | AGGF1 |
| hsa-miR-942-5p | SCAMP1 |
| hsa-miR-942-5p | CMYA5 |
| hsa-miR-942-5p | THBS4 |
| hsa-miR-942-5p | VCAN |
| hsa-miR-942-5p | RHOBTB3 |
| hsa-miR-942-5p | PAM |
| hsa-miR-942-5p | DCP2 |
| hsa-miR-942-5p | CSNK1G3 |
| hsa-miR-942-5p | SLC22A5 |
| hsa-miR-942-5p | RAD50 |
| hsa-miR-942-5p | AC116366.3 |
| hsa-miR-942-5p | JADE2 |
| hsa-miR-942-5p | CAMLG |
| hsa-miR-942-5p | DDX46 |
| hsa-miR-942-5p | PCBD2 |
| hsa-miR-942-5p | TGFBI |
| hsa-miR-942-5p | FAM53C |
| hsa-miR-942-5p | KDM3B |
| hsa-miR-942-5p | CTNNA1 |
| hsa-miR-942-5p | UBE2D2 |
| hsa-miR-942-5p | SLC35A4 |
| hsa-miR-942-5p | PCDHB12 |
| hsa-miR-942-5p | RNF14 |
| hsa-miR-942-5p | ARHGAP26 |
| hsa-miR-942-5p | RBM27 |
| hsa-miR-942-5p | AC091959.3 |
| hsa-miR-942-5p | TCERG1 |
| hsa-miR-942-5p | ABLIM3 |
| hsa-miR-942-5p | PCYOX1L |
| hsa-miR-942-5p | ARHGEF37 |
| hsa-miR-942-5p | SLC26A2 |
| hsa-miR-942-5p | HMGXB3 |
| hsa-miR-942-5p | NDST1 |
| hsa-miR-942-5p | SMIM3 |
| hsa-miR-942-5p | AC010441.1 |
| hsa-miR-942-5p | GM2A |
| hsa-miR-942-5p | SLC36A1 |
| hsa-miR-942-5p | GALNT10 |
| hsa-miR-942-5p | LARP1 |
| hsa-miR-942-5p | CYFIP2 |
| hsa-miR-942-5p | NIPAL4 |
| hsa-miR-942-5p | LSM11 |
| hsa-miR-942-5p | CCNG1 |
| hsa-miR-942-5p | MAT2B |
| hsa-miR-942-5p | DOCK2 |
| hsa-miR-942-5p | NPM1 |
| hsa-miR-942-5p | ATP6V0E1 |
| hsa-miR-942-5p | CREBRF |
| hsa-miR-942-5p | CPEB4 |
| hsa-miR-942-5p | MSX2 |
| hsa-miR-942-5p | SFXN1 |
| hsa-miR-942-5p | FAF2 |
| hsa-miR-942-5p | TSPAN17 |
| hsa-miR-942-5p | FGFR4 |
| hsa-miR-942-5p | N4BP3 |
| hsa-miR-942-5p | ZNF354C |
| hsa-miR-942-5p | RUFY1 |
| hsa-miR-942-5p | CANX |
| hsa-miR-942-5p | MAML1 |
| hsa-miR-942-5p | SQSTM1 |
| hsa-miR-942-5p | SERPINB9 |
| hsa-miR-942-5p | SLC22A23 |
| hsa-miR-942-5p | NRN1 |
| hsa-miR-942-5p | SSR1 |
| hsa-miR-942-5p | TXNDC5 |
| hsa-miR-942-5p | BLOC1S5-TXNDC5 |
| hsa-miR-942-5p | BLOC1S5 |
| hsa-miR-942-5p | GFOD1 |
| hsa-miR-942-5p | ATXN1 |
| hsa-miR-942-5p | KIF13A |
| hsa-miR-942-5p | C6orf62 |
| hsa-miR-942-5p | ZNF322 |
| hsa-miR-942-5p | GABBR1 |
| hsa-miR-942-5p | UBD |
| hsa-miR-942-5p | PPP1R10 |
| hsa-miR-942-5p | DDX39B |
| hsa-miR-942-5p | ATP6V1G2-DDX39B |
| hsa-miR-942-5p | NELFE |
| hsa-miR-942-5p | TAP2 |
| hsa-miR-942-5p | AL669918.1 |
| hsa-miR-942-5p | BAK1 |
| hsa-miR-942-5p | LEMD2 |
| hsa-miR-942-5p | C6orf106 |
| hsa-miR-942-5p | TEAD3 |
| hsa-miR-942-5p | FKBP5 |
| hsa-miR-942-5p | STK38 |
| hsa-miR-942-5p | PPIL1 |
| hsa-miR-942-5p | OARD1 |
| hsa-miR-942-5p | TFEB |
| hsa-miR-942-5p | USP49 |
| hsa-miR-942-5p | MED20 |
| hsa-miR-942-5p | CCND3 |
| hsa-miR-942-5p | C6orf132 |
| hsa-miR-942-5p | XPO5 |
| hsa-miR-942-5p | GTPBP2 |
| hsa-miR-942-5p | AARS2 |
| hsa-miR-942-5p | MCM3 |
| hsa-miR-942-5p | TRAM2 |
| hsa-miR-942-5p | ICK |
| hsa-miR-942-5p | DST |
| hsa-miR-942-5p | LGSN |
| hsa-miR-942-5p | COL12A1 |
| hsa-miR-942-5p | TMEM30A |
| hsa-miR-942-5p | LCA5 |
| hsa-miR-942-5p | FAM46A |
| hsa-miR-942-5p | IBTK |
| hsa-miR-942-5p | PGM3 |
| hsa-miR-942-5p | ME1 |
| hsa-miR-942-5p | CEP162 |
| hsa-miR-942-5p | SNX14 |
| hsa-miR-942-5p | SYNCRIP |
| hsa-miR-942-5p | UBE2J1 |
| hsa-miR-942-5p | MDN1 |
| hsa-miR-942-5p | EPHA7 |
| hsa-miR-942-5p | MMS22L |
| hsa-miR-942-5p | ASCC3 |
| hsa-miR-942-5p | PREP |
| hsa-miR-942-5p | OSTM1 |
| hsa-miR-942-5p | CD164 |
| hsa-miR-942-5p | ZBTB24 |
| hsa-miR-942-5p | REV3L |
| hsa-miR-942-5p | HDAC2 |
| hsa-miR-942-5p | TSPYL4 |
| hsa-miR-942-5p | TRAPPC3L |
| hsa-miR-942-5p | GOPC |
| hsa-miR-942-5p | PTPRK |
| hsa-miR-942-5p | CTGF |
| hsa-miR-942-5p | BCLAF1 |
| hsa-miR-942-5p | MAP7 |
| hsa-miR-942-5p | PERP |
| hsa-miR-942-5p | NHSL1 |
| hsa-miR-942-5p | HIVEP2 |
| hsa-miR-942-5p | SF3B5 |
| hsa-miR-942-5p | SHPRH |
| hsa-miR-942-5p | AGPAT4 |
| hsa-miR-942-5p | PDE10A |
| hsa-miR-942-5p | RPS6KA2 |
| hsa-miR-942-5p | THBS2 |
| hsa-miR-942-5p | IRF4 |
| hsa-miR-942-5p | NQO2 |
| hsa-miR-942-5p | RIPK1 |
| hsa-miR-942-5p | PSMG4 |
| hsa-miR-942-5p | RREB1 |
| hsa-miR-942-5p | GCNT2 |
| hsa-miR-942-5p | SMIM13 |
| hsa-miR-942-5p | TMEM170B |
| hsa-miR-942-5p | PHACTR1 |
| hsa-miR-942-5p | CD83 |
| hsa-miR-942-5p | JARID2 |
| hsa-miR-942-5p | E2F3 |
| hsa-miR-942-5p | SOX4 |
| hsa-miR-942-5p | ALDH5A1 |
| hsa-miR-942-5p | HIST1H2BD |
| hsa-miR-942-5p | BTN2A1 |
| hsa-miR-942-5p | ZKSCAN8 |
| hsa-miR-942-5p | ZSCAN26 |
| hsa-miR-942-5p | HLA-A |
| hsa-miR-942-5p | TRIM39 |
| hsa-miR-942-5p | TRIM39-RPP21 |
| hsa-miR-942-5p | SYNGAP1 |
| hsa-miR-942-5p | ZBTB9 |
| hsa-miR-942-5p | SNRPC |
| hsa-miR-942-5p | ANKS1A |
| hsa-miR-942-5p | ZNF76 |
| hsa-miR-942-5p | PPARD |
| hsa-miR-942-5p | MAPK14 |
| hsa-miR-942-5p | CDKN1A |
| hsa-miR-942-5p | C6orf89 |
| hsa-miR-942-5p | RNF8 |
| hsa-miR-942-5p | FOXP4 |
| hsa-miR-942-5p | UBR2 |
| hsa-miR-942-5p | RPL7L1 |
| hsa-miR-942-5p | PPP2R5D |
| hsa-miR-942-5p | KLHDC3 |
| hsa-miR-942-5p | RRP36 |
| hsa-miR-942-5p | VEGFA |
| hsa-miR-942-5p | RUNX2 |
| hsa-miR-942-5p | CD2AP |
| hsa-miR-942-5p | BAG2 |
| hsa-miR-942-5p | PHF3 |
| hsa-miR-942-5p | MYO6 |
| hsa-miR-942-5p | NT5E |
| hsa-miR-942-5p | SMIM8 |
| hsa-miR-942-5p | SLC35A1 |
| hsa-miR-942-5p | PM20D2 |
| hsa-miR-942-5p | ANKRD6 |
| hsa-miR-942-5p | LIN28B |
| hsa-miR-942-5p | CRYBG1 |
| hsa-miR-942-5p | SOBP |
| hsa-miR-942-5p | CDC40 |
| hsa-miR-942-5p | MFSD4B |
| hsa-miR-942-5p | MARCKS |
| hsa-miR-942-5p | KPNA5 |
| hsa-miR-942-5p | NUS1 |
| hsa-miR-942-5p | SLC35F1 |
| hsa-miR-942-5p | ASF1A |
| hsa-miR-942-5p | GJA1 |
| hsa-miR-942-5p | RNF217 |
| hsa-miR-942-5p | RSPO3 |
| hsa-miR-942-5p | L3MBTL3 |
| hsa-miR-942-5p | ARG1 |
| hsa-miR-942-5p | ENPP1 |
| hsa-miR-942-5p | MYB |
| hsa-miR-942-5p | TNFAIP3 |
| hsa-miR-942-5p | ARFGEF3 |
| hsa-miR-942-5p | ADGRG6 |
| hsa-miR-942-5p | PHACTR2 |
| hsa-miR-942-5p | UTRN |
| hsa-miR-942-5p | RAB32 |
| hsa-miR-942-5p | TAB2 |
| hsa-miR-942-5p | PPP1R14C |
| hsa-miR-942-5p | MTHFD1L |
| hsa-miR-942-5p | AKAP12 |
| hsa-miR-942-5p | CCDC170 |
| hsa-miR-942-5p | ESR1 |
| hsa-miR-942-5p | ZDHHC14 |
| hsa-miR-942-5p | SNX9 |
| hsa-miR-942-5p | TULP4 |
| hsa-miR-942-5p | TMEM181 |
| hsa-miR-942-5p | IGF2R |
| hsa-miR-942-5p | MAP3K4 |
| hsa-miR-942-5p | QKI |
| hsa-miR-942-5p | AFDN |
| hsa-miR-942-5p | SMOC2 |
| hsa-miR-942-5p | C6orf120 |
| hsa-miR-942-5p | FAM120B |
| hsa-miR-942-5p | TBP |
| hsa-miR-942-5p | BRAT1 |
| hsa-miR-942-5p | GNA12 |
| hsa-miR-942-5p | TNRC18 |
| hsa-miR-942-5p | FBXL18 |
| hsa-miR-942-5p | ACTB |
| hsa-miR-942-5p | CYTH3 |
| hsa-miR-942-5p | FAM220A |
| hsa-miR-942-5p | SNX13 |
| hsa-miR-942-5p | TWIST1 |
| hsa-miR-942-5p | TWISTNB |
| hsa-miR-942-5p | FAM126A |
| hsa-miR-942-5p | IGF2BP3 |
| hsa-miR-942-5p | CYCS |
| hsa-miR-942-5p | HNRNPA2B1 |
| hsa-miR-942-5p | HOXA1 |
| hsa-miR-942-5p | HOXA10 |
| hsa-miR-942-5p | HIBADH |
| hsa-miR-942-5p | GGCT |
| hsa-miR-942-5p | AC005154.6 |
| hsa-miR-942-5p | ELMO1 |
| hsa-miR-942-5p | INHBA |
| hsa-miR-942-5p | C7orf25 |
| hsa-miR-942-5p | AC010132.3 |
| hsa-miR-942-5p | NUDCD3 |
| hsa-miR-942-5p | H2AFV |
| hsa-miR-942-5p | PURB |
| hsa-miR-942-5p | IGFBP3 |
| hsa-miR-942-5p | TNS3 |
| hsa-miR-942-5p | GRB10 |
| hsa-miR-942-5p | VOPP1 |
| hsa-miR-942-5p | ZNF680 |
| hsa-miR-942-5p | ZNF117 |
| hsa-miR-942-5p | BAZ1B |
| hsa-miR-942-5p | BCL7B |
| hsa-miR-942-5p | TBL2 |
| hsa-miR-942-5p | DNAJC30 |
| hsa-miR-942-5p | RFC2 |
| hsa-miR-942-5p | POM121C |
| hsa-miR-942-5p | HIP1 |
| hsa-miR-942-5p | STYXL1 |
| hsa-miR-942-5p | YWHAG |
| hsa-miR-942-5p | KIAA1324L |
| hsa-miR-942-5p | CDK6 |
| hsa-miR-942-5p | SMURF1 |
| hsa-miR-942-5p | PDAP1 |
| hsa-miR-942-5p | ZNF3 |
| hsa-miR-942-5p | GIGYF1 |
| hsa-miR-942-5p | POLR2J |
| hsa-miR-942-5p | PUS7 |
| hsa-miR-942-5p | SYPL1 |
| hsa-miR-942-5p | THAP5 |
| hsa-miR-942-5p | DOCK4 |
| hsa-miR-942-5p | CADPS2 |
| hsa-miR-942-5p | GPR37 |
| hsa-miR-942-5p | GCC1 |
| hsa-miR-942-5p | IMPDH1 |
| hsa-miR-942-5p | UBE2H |
| hsa-miR-942-5p | TMEM209 |
| hsa-miR-942-5p | PODXL |
| hsa-miR-942-5p | PLXNA4 |
| hsa-miR-942-5p | CHCHD3 |
| hsa-miR-942-5p | CNOT4 |
| hsa-miR-942-5p | CREB3L2 |
| hsa-miR-942-5p | KIAA1549 |
| hsa-miR-942-5p | ZC3HAV1 |
| hsa-miR-942-5p | HIPK2 |
| hsa-miR-942-5p | KDM7A |
| hsa-miR-942-5p | TCAF1 |
| hsa-miR-942-5p | EZH2 |
| hsa-miR-942-5p | RHEB |
| hsa-miR-942-5p | KMT2C |
| hsa-miR-942-5p | MNX1 |
| hsa-miR-942-5p | ESYT2 |
| hsa-miR-942-5p | MAFK |
| hsa-miR-942-5p | AMZ1 |
| hsa-miR-942-5p | SDK1 |
| hsa-miR-942-5p | FOXK1 |
| hsa-miR-942-5p | RBAK |
| hsa-miR-942-5p | RBAK-RBAKDN |
| hsa-miR-942-5p | RAC1 |
| hsa-miR-942-5p | PHF14 |
| hsa-miR-942-5p | ARL4A |
| hsa-miR-942-5p | BZW2 |
| hsa-miR-942-5p | TSPAN13 |
| hsa-miR-942-5p | HDAC9 |
| hsa-miR-942-5p | DNAH11 |
| hsa-miR-942-5p | KLHL7 |
| hsa-miR-942-5p | GPNMB |
| hsa-miR-942-5p | SNX10 |
| hsa-miR-942-5p | TAX1BP1 |
| hsa-miR-942-5p | PRR15 |
| hsa-miR-942-5p | MTURN |
| hsa-miR-942-5p | AVL9 |
| hsa-miR-942-5p | FKBP9 |
| hsa-miR-942-5p | EEPD1 |
| hsa-miR-942-5p | EPDR1 |
| hsa-miR-942-5p | RALA |
| hsa-miR-942-5p | CDK13 |
| hsa-miR-942-5p | UBE2D4 |
| hsa-miR-942-5p | AEBP1 |
| hsa-miR-942-5p | ADCY1 |
| hsa-miR-942-5p | EGFR |
| hsa-miR-942-5p | ZNF713 |
| hsa-miR-942-5p | SUMF2 |
| hsa-miR-942-5p | ZNF107 |
| hsa-miR-942-5p | CRCP |
| hsa-miR-942-5p | TPST1 |
| hsa-miR-942-5p | KCTD7 |
| hsa-miR-942-5p | RABGEF1 |
| hsa-miR-942-5p | AC027644.4 |
| hsa-miR-942-5p | TMEM248 |
| hsa-miR-942-5p | AUTS2 |
| hsa-miR-942-5p | POM121 |
| hsa-miR-942-5p | LIMK1 |
| hsa-miR-942-5p | EIF4H |
| hsa-miR-942-5p | GTF2I |
| hsa-miR-942-5p | GTF2IRD2B |
| hsa-miR-942-5p | CCDC146 |
| hsa-miR-942-5p | DBF4 |
| hsa-miR-942-5p | CLDN12 |
| hsa-miR-942-5p | RBM48 |
| hsa-miR-942-5p | VPS50 |
| hsa-miR-942-5p | COL1A2 |
| hsa-miR-942-5p | PEG10 |
| hsa-miR-942-5p | PPP1R9A |
| hsa-miR-942-5p | ZKSCAN5 |
| hsa-miR-942-5p | ZNF655 |
| hsa-miR-942-5p | ZSCAN25 |
| hsa-miR-942-5p | ZKSCAN1 |
| hsa-miR-942-5p | LAMTOR4 |
| hsa-miR-942-5p | STAG3 |
| hsa-miR-942-5p | SERPINE1 |
| hsa-miR-942-5p | PRKRIP1 |
| hsa-miR-942-5p | PMPCB |
| hsa-miR-942-5p | KMT2E |
| hsa-miR-942-5p | RINT1 |
| hsa-miR-942-5p | DLD |
| hsa-miR-942-5p | CALU |
| hsa-miR-942-5p | SMO |
| hsa-miR-942-5p | NRF1 |
| hsa-miR-942-5p | MEST |
| hsa-miR-942-5p | MKLN1 |
| hsa-miR-942-5p | CALD1 |
| hsa-miR-942-5p | UBN2 |
| hsa-miR-942-5p | LUC7L2 |
| hsa-miR-942-5p | C7orf55-LUC7L2 |
| hsa-miR-942-5p | TMEM178B |
| hsa-miR-942-5p | CASP2 |
| hsa-miR-942-5p | ZNF398 |
| hsa-miR-942-5p | ZNF212 |
| hsa-miR-942-5p | ZBED6CL |
| hsa-miR-942-5p | ABCB8 |
| hsa-miR-942-5p | GALNT11 |
| hsa-miR-942-5p | ACTR3B |
| hsa-miR-942-5p | INSIG1 |
| hsa-miR-942-5p | NOM1 |
| hsa-miR-942-5p | MFHAS1 |
| hsa-miR-942-5p | LONRF1 |
| hsa-miR-942-5p | DLC1 |
| hsa-miR-942-5p | CNOT7 |
| hsa-miR-942-5p | MTUS1 |
| hsa-miR-942-5p | EGR3 |
| hsa-miR-942-5p | LOXL2 |
| hsa-miR-942-5p | ENTPD4 |
| hsa-miR-942-5p | NEFL |
| hsa-miR-942-5p | ZNF395 |
| hsa-miR-942-5p | INTS9 |
| hsa-miR-942-5p | DUSP4 |
| hsa-miR-942-5p | RNF122 |
| hsa-miR-942-5p | BRF2 |
| hsa-miR-942-5p | LSM1 |
| hsa-miR-942-5p | NSD3 |
| hsa-miR-942-5p | TM2D2 |
| hsa-miR-942-5p | ANK1 |
| hsa-miR-942-5p | CEBPD |
| hsa-miR-942-5p | PRKDC |
| hsa-miR-942-5p | ATP6V1H |
| hsa-miR-942-5p | NSMAF |
| hsa-miR-942-5p | ARMC1 |
| hsa-miR-942-5p | MYBL1 |
| hsa-miR-942-5p | VCPIP1 |
| hsa-miR-942-5p | NCOA2 |
| hsa-miR-942-5p | UBE2W |
| hsa-miR-942-5p | ZNF704 |
| hsa-miR-942-5p | PAG1 |
| hsa-miR-942-5p | ZFAND1 |
| hsa-miR-942-5p | DCAF4L2 |
| hsa-miR-942-5p | NBN |
| hsa-miR-942-5p | TRIQK |
| hsa-miR-942-5p | CDH17 |
| hsa-miR-942-5p | VIRMA |
| hsa-miR-942-5p | TP53INP1 |
| hsa-miR-942-5p | UQCRB |
| hsa-miR-942-5p | RIDA |
| hsa-miR-942-5p | NIPAL2 |
| hsa-miR-942-5p | RRM2B |
| hsa-miR-942-5p | UBR5 |
| hsa-miR-942-5p | AZIN1 |
| hsa-miR-942-5p | LRP12 |
| hsa-miR-942-5p | TRPS1 |
| hsa-miR-942-5p | EXT1 |
| hsa-miR-942-5p | SAMD12 |
| hsa-miR-942-5p | DERL1 |
| hsa-miR-942-5p | ATAD2 |
| hsa-miR-942-5p | FBXO32 |
| hsa-miR-942-5p | FAM84B |
| hsa-miR-942-5p | NDRG1 |
| hsa-miR-942-5p | ZFAT |
| hsa-miR-942-5p | AGO2 |
| hsa-miR-942-5p | PTK2 |
| hsa-miR-942-5p | PYCR3 |
| hsa-miR-942-5p | PLEC |
| hsa-miR-942-5p | C8orf82 |
| hsa-miR-942-5p | ZNF250 |
| hsa-miR-942-5p | CLN8 |
| hsa-miR-942-5p | MCPH1 |
| hsa-miR-942-5p | AGPAT5 |
| hsa-miR-942-5p | ERI1 |
| hsa-miR-942-5p | TNKS |
| hsa-miR-942-5p | MTMR9 |
| hsa-miR-942-5p | FDFT1 |
| hsa-miR-942-5p | VPS37A |
| hsa-miR-942-5p | SLC7A2 |
| hsa-miR-942-5p | PCM1 |
| hsa-miR-942-5p | SH2D4A |
| hsa-miR-942-5p | INTS10 |
| hsa-miR-942-5p | ATP6V1B2 |
| hsa-miR-942-5p | XPO7 |
| hsa-miR-942-5p | FAM160B2 |
| hsa-miR-942-5p | BMP1 |
| hsa-miR-942-5p | POLR3D |
| hsa-miR-942-5p | SLC39A14 |
| hsa-miR-942-5p | PDLIM2 |
| hsa-miR-942-5p | RHOBTB2 |
| hsa-miR-942-5p | CHMP7 |
| hsa-miR-942-5p | DOCK5 |
| hsa-miR-942-5p | SCARA3 |
| hsa-miR-942-5p | FZD3 |
| hsa-miR-942-5p | RBPMS |
| hsa-miR-942-5p | MAK16 |
| hsa-miR-942-5p | ADGRA2 |
| hsa-miR-942-5p | ASH2L |
| hsa-miR-942-5p | BAG4 |
| hsa-miR-942-5p | TACC1 |
| hsa-miR-942-5p | PLEKHA2 |
| hsa-miR-942-5p | ADAM9 |
| hsa-miR-942-5p | GINS4 |
| hsa-miR-942-5p | AP3M2 |
| hsa-miR-942-5p | IKBKB |
| hsa-miR-942-5p | VDAC3 |
| hsa-miR-942-5p | FNTA |
| hsa-miR-942-5p | UBE2V2 |
| hsa-miR-942-5p | TGS1 |
| hsa-miR-942-5p | LYN |
| hsa-miR-942-5p | CHCHD7 |
| hsa-miR-942-5p | CHD7 |
| hsa-miR-942-5p | RDH10 |
| hsa-miR-942-5p | GDAP1 |
| hsa-miR-942-5p | ZBTB10 |
| hsa-miR-942-5p | RIPK2 |
| hsa-miR-942-5p | INTS8 |
| hsa-miR-942-5p | NDUFAF6 |
| hsa-miR-942-5p | PLEKHF2 |
| hsa-miR-942-5p | MTDH |
| hsa-miR-942-5p | OSR2 |
| hsa-miR-942-5p | VPS13B |
| hsa-miR-942-5p | GRHL2 |
| hsa-miR-942-5p | ATP6V1C1 |
| hsa-miR-942-5p | ENY2 |
| hsa-miR-942-5p | DEPTOR |
| hsa-miR-942-5p | FAM91A1 |
| hsa-miR-942-5p | TRMT12 |
| hsa-miR-942-5p | TRIB1 |
| hsa-miR-942-5p | EFR3A |
| hsa-miR-942-5p | PHF20L1 |
| hsa-miR-942-5p | TG |
| hsa-miR-942-5p | ADGRB1 |
| hsa-miR-942-5p | ZNF623 |
| hsa-miR-942-5p | ZNF707 |
| hsa-miR-942-5p | KIFC2 |
| hsa-miR-942-5p | C8orf33 |
| hsa-miR-942-5p | AK3 |
| hsa-miR-942-5p | KIAA2026 |
| hsa-miR-942-5p | DMAC1 |
| hsa-miR-942-5p | PTPRD |
| hsa-miR-942-5p | NFIB |
| hsa-miR-942-5p | ZDHHC21 |
| hsa-miR-942-5p | CDKN2B |
| hsa-miR-942-5p | PLAA |
| hsa-miR-942-5p | SMU1 |
| hsa-miR-942-5p | NOL6 |
| hsa-miR-942-5p | KIF24 |
| hsa-miR-942-5p | FAM219A |
| hsa-miR-942-5p | RPP25L |
| hsa-miR-942-5p | SIGMAR1 |
| hsa-miR-942-5p | RNF38 |
| hsa-miR-942-5p | ZBTB5 |
| hsa-miR-942-5p | SHB |
| hsa-miR-942-5p | APBA1 |
| hsa-miR-942-5p | PTAR1 |
| hsa-miR-942-5p | TMEM2 |
| hsa-miR-942-5p | ABHD17B |
| hsa-miR-942-5p | RFK |
| hsa-miR-942-5p | GOLM1 |
| hsa-miR-942-5p | ISCA1 |
| hsa-miR-942-5p | SEMA4D |
| hsa-miR-942-5p | SPTLC1 |
| hsa-miR-942-5p | NOL8 |
| hsa-miR-942-5p | BICD2 |
| hsa-miR-942-5p | NINJ1 |
| hsa-miR-942-5p | FAM120AOS |
| hsa-miR-942-5p | CDC14B |
| hsa-miR-942-5p | ELP1 |
| hsa-miR-942-5p | TMEM245 |
| hsa-miR-942-5p | C9orf152 |
| hsa-miR-942-5p | PTBP3 |
| hsa-miR-942-5p | FKBP15 |
| hsa-miR-942-5p | ALAD |
| hsa-miR-942-5p | POLE3 |
| hsa-miR-942-5p | CDK5RAP2 |
| hsa-miR-942-5p | MEGF9 |
| hsa-miR-942-5p | FBXW2 |
| hsa-miR-942-5p | RAB14 |
| hsa-miR-942-5p | STOM |
| hsa-miR-942-5p | ZBTB26 |
| hsa-miR-942-5p | STRBP |
| hsa-miR-942-5p | NR6A1 |
| hsa-miR-942-5p | PPP6C |
| hsa-miR-942-5p | HSPA5 |
| hsa-miR-942-5p | MAPKAP1 |
| hsa-miR-942-5p | ENG |
| hsa-miR-942-5p | FAM102A |
| hsa-miR-942-5p | TRUB2 |
| hsa-miR-942-5p | ASB6 |
| hsa-miR-942-5p | PTGES |
| hsa-miR-942-5p | RAPGEF1 |
| hsa-miR-942-5p | SETX |
| hsa-miR-942-5p | TSC1 |
| hsa-miR-942-5p | MED22 |
| hsa-miR-942-5p | REXO4 |
| hsa-miR-942-5p | BRD3 |
| hsa-miR-942-5p | CAMSAP1 |
| hsa-miR-942-5p | TMEM250 |
| hsa-miR-942-5p | NOTCH1 |
| hsa-miR-942-5p | ABCA2 |
| hsa-miR-942-5p | SAPCD2 |
| hsa-miR-942-5p | SMARCA2 |
| hsa-miR-942-5p | SLC1A1 |
| hsa-miR-942-5p | PLPP6 |
| hsa-miR-942-5p | CDC37L1 |
| hsa-miR-942-5p | UHRF2 |
| hsa-miR-942-5p | RRAGA |
| hsa-miR-942-5p | ACER2 |
| hsa-miR-942-5p | DNAJA1 |
| hsa-miR-942-5p | UBE2R2 |
| hsa-miR-942-5p | UBAP1 |
| hsa-miR-942-5p | UNC13B |
| hsa-miR-942-5p | GLIPR2 |
| hsa-miR-942-5p | ZCCHC7 |
| hsa-miR-942-5p | TJP2 |
| hsa-miR-942-5p | AL358113.1 |
| hsa-miR-942-5p | GCNT1 |
| hsa-miR-942-5p | VPS13A |
| hsa-miR-942-5p | PSAT1 |
| hsa-miR-942-5p | TLE4 |
| hsa-miR-942-5p | NTRK2 |
| hsa-miR-942-5p | DAPK1 |
| hsa-miR-942-5p | C9orf47 |
| hsa-miR-942-5p | CENPP |
| hsa-miR-942-5p | PHF2 |
| hsa-miR-942-5p | FOXE1 |
| hsa-miR-942-5p | TGFBR1 |
| hsa-miR-942-5p | FKTN |
| hsa-miR-942-5p | TMEM38B |
| hsa-miR-942-5p | ZNF462 |
| hsa-miR-942-5p | RAD23B |
| hsa-miR-942-5p | PALM2-AKAP2 |
| hsa-miR-942-5p | AKAP2 |
| hsa-miR-942-5p | ZNF483 |
| hsa-miR-942-5p | UGCG |
| hsa-miR-942-5p | KIAA1958 |
| hsa-miR-942-5p | PRPF4 |
| hsa-miR-942-5p | RGS3 |
| hsa-miR-942-5p | ZNF618 |
| hsa-miR-942-5p | TMEM268 |
| hsa-miR-942-5p | PAPPA |
| hsa-miR-942-5p | CNTRL |
| hsa-miR-942-5p | RABGAP1 |
| hsa-miR-942-5p | ARPC5L |
| hsa-miR-942-5p | ZBTB43 |
| hsa-miR-942-5p | STXBP1 |
| hsa-miR-942-5p | ODF2 |
| hsa-miR-942-5p | GLE1 |
| hsa-miR-942-5p | SPTAN1 |
| hsa-miR-942-5p | SET |
| hsa-miR-942-5p | TBC1D13 |
| hsa-miR-942-5p | MIGA2 |
| hsa-miR-942-5p | PTPA |
| hsa-miR-942-5p | TOR1B |
| hsa-miR-942-5p | NCS1 |
| hsa-miR-942-5p | ABL1 |
| hsa-miR-942-5p | AIF1L |
| hsa-miR-942-5p | GTF3C4 |
| hsa-miR-942-5p | CCDC183 |
| hsa-miR-942-5p | UAP1L1 |
| hsa-miR-942-5p | ARSD |
| hsa-miR-942-5p | ANOS1 |
| hsa-miR-942-5p | ACE2 |
| hsa-miR-942-5p | RBBP7 |
| hsa-miR-942-5p | MAP7D2 |
| hsa-miR-942-5p | RPS6KA3 |
| hsa-miR-942-5p | KLHL15 |
| hsa-miR-942-5p | DYNLT3 |
| hsa-miR-942-5p | PIM2 |
| hsa-miR-942-5p | SMC1A |
| hsa-miR-942-5p | HUWE1 |
| hsa-miR-942-5p | PHF8 |
| hsa-miR-942-5p | FAM120C |
| hsa-miR-942-5p | SPIN4 |
| hsa-miR-942-5p | AMER1 |
| hsa-miR-942-5p | ZMYM3 |
| hsa-miR-942-5p | NEXMIF |
| hsa-miR-942-5p | ATRX |
| hsa-miR-942-5p | BRWD3 |
| hsa-miR-942-5p | POF1B |
| hsa-miR-942-5p | CHM |
| hsa-miR-942-5p | TSC22D3 |
| hsa-miR-942-5p | ACSL4 |
| hsa-miR-942-5p | AMMECR1 |
| hsa-miR-942-5p | TRPC5 |
| hsa-miR-942-5p | AMOT |
| hsa-miR-942-5p | 6-Sep |
| hsa-miR-942-5p | UPF3B |
| hsa-miR-942-5p | CUL4B |
| hsa-miR-942-5p | APLN |
| hsa-miR-942-5p | ZDHHC9 |
| hsa-miR-942-5p | ELF4 |
| hsa-miR-942-5p | FAM122B |
| hsa-miR-942-5p | RTL8B |
| hsa-miR-942-5p | ZNF75D |
| hsa-miR-942-5p | FGF13 |
| hsa-miR-942-5p | CCNQ |
| hsa-miR-942-5p | IRAK1 |
| hsa-miR-942-5p | MECP2 |
| hsa-miR-942-5p | UBL4A |
| hsa-miR-942-5p | SLC10A3 |
| hsa-miR-942-5p | CMC4 |
| hsa-miR-942-5p | MTCP1 |
| hsa-miR-942-5p | STS |
| hsa-miR-942-5p | FRMPD4 |
| hsa-miR-942-5p | RAB9A |
| hsa-miR-942-5p | OFD1 |
| hsa-miR-942-5p | NHS |
| hsa-miR-942-5p | ZFX |
| hsa-miR-942-5p | IL1RAPL1 |
| hsa-miR-942-5p | OTC |
| hsa-miR-942-5p | MID1IP1 |
| hsa-miR-942-5p | USP9X |
| hsa-miR-942-5p | KRBOX4 |
| hsa-miR-942-5p | ZNF81 |
| hsa-miR-942-5p | EBP |
| hsa-miR-942-5p | CLCN5 |
| hsa-miR-942-5p | APEX2 |
| hsa-miR-942-5p | MSN |
| hsa-miR-942-5p | AR |
| hsa-miR-942-5p | PIN4 |
| hsa-miR-942-5p | CHIC1 |
| hsa-miR-942-5p | ZNF711 |
| hsa-miR-942-5p | DIAPH2 |
| hsa-miR-942-5p | HNRNPH2 |
| hsa-miR-942-5p | RPL36A-HNRNPH2 |
| hsa-miR-942-5p | FAM199X |
| hsa-miR-942-5p | TBC1D8B |
| hsa-miR-942-5p | COL4A5 |
| hsa-miR-942-5p | NXT2 |
| hsa-miR-942-5p | TMEM164 |
| hsa-miR-942-5p | ALG13 |
| hsa-miR-942-5p | PLS3 |
| hsa-miR-942-5p | SLC25A43 |
| hsa-miR-942-5p | UTP14A |
| hsa-miR-942-5p | BCORL1 |
| hsa-miR-942-5p | HPRT1 |
| hsa-miR-942-5p | FHL1 |
| hsa-miR-942-5p | FMR1 |
| hsa-miR-942-5p | MTMR1 |
| hsa-miR-942-5p | HMGB3 |
| hsa-miR-942-5p | ATP6AP1 |
| hsa-miR-942-5p | GDI1 |
| hsa-miR-942-5p | DKC1 |
| hsa-miR-942-5p | VBP1 |
| hsa-miR-942-5p | VAMP7 |
| hsa-miR-532-3p | PCDH11Y |
| hsa-miR-532-3p | MXRA8 |
| hsa-miR-532-3p | SSU72 |
| hsa-miR-532-3p | NADK |
| hsa-miR-532-3p | TMEM52 |
| hsa-miR-532-3p | PEX10 |
| hsa-miR-532-3p | LRRC47 |
| hsa-miR-532-3p | CHD5 |
| hsa-miR-532-3p | ICMT |
| hsa-miR-532-3p | HES2 |
| hsa-miR-532-3p | NOL9 |
| hsa-miR-532-3p | KLHL21 |
| hsa-miR-532-3p | DNAJC11 |
| hsa-miR-532-3p | GPR157 |
| hsa-miR-532-3p | CLSTN1 |
| hsa-miR-532-3p | DFFA |
| hsa-miR-532-3p | CASZ1 |
| hsa-miR-532-3p | MTHFR |
| hsa-miR-532-3p | RCC2 |
| hsa-miR-532-3p | ALDH4A1 |
| hsa-miR-532-3p | IFFO2 |
| hsa-miR-532-3p | EMC1 |
| hsa-miR-532-3p | CAPZB |
| hsa-miR-532-3p | PLA2G2D |
| hsa-miR-532-3p | DDOST |
| hsa-miR-532-3p | EIF4G3 |
| hsa-miR-532-3p | ECE1 |
| hsa-miR-532-3p | USP48 |
| hsa-miR-532-3p | HSPG2 |
| hsa-miR-532-3p | ASAP3 |
| hsa-miR-532-3p | E2F2 |
| hsa-miR-532-3p | FUCA1 |
| hsa-miR-532-3p | RSRP1 |
| hsa-miR-532-3p | PAFAH2 |
| hsa-miR-532-3p | GPATCH3 |
| hsa-miR-532-3p | NR0B2 |
| hsa-miR-532-3p | FAM46B |
| hsa-miR-532-3p | PTAFR |
| hsa-miR-532-3p | MECR |
| hsa-miR-532-3p | PUM1 |
| hsa-miR-532-3p | PHC2 |
| hsa-miR-532-3p | SMIM12 |
| hsa-miR-532-3p | C1orf216 |
| hsa-miR-532-3p | STK40 |
| hsa-miR-532-3p | C1orf109 |
| hsa-miR-532-3p | EPHA10 |
| hsa-miR-532-3p | YRDC |
| hsa-miR-532-3p | RRAGC |
| hsa-miR-532-3p | PPT1 |
| hsa-miR-532-3p | RIMS3 |
| hsa-miR-532-3p | FOXJ3 |
| hsa-miR-532-3p | SLC2A1 |
| hsa-miR-532-3p | ELOVL1 |
| hsa-miR-532-3p | SLC6A9 |
| hsa-miR-532-3p | TESK2 |
| hsa-miR-532-3p | PIK3R3 |
| hsa-miR-532-3p | MOB3C |
| hsa-miR-532-3p | CC2D1B |
| hsa-miR-532-3p | ECHDC2 |
| hsa-miR-532-3p | MAGOH |
| hsa-miR-532-3p | NDC1 |
| hsa-miR-532-3p | DHCR24 |
| hsa-miR-532-3p | PLPP3 |
| hsa-miR-532-3p | MYSM1 |
| hsa-miR-532-3p | SLC35D1 |
| hsa-miR-532-3p | SERBP1 |
| hsa-miR-532-3p | GNG12 |
| hsa-miR-532-3p | NEGR1 |
| hsa-miR-532-3p | RBMXL1 |
| hsa-miR-532-3p | TMED5 |
| hsa-miR-532-3p | DBT |
| hsa-miR-532-3p | DRAM2 |
| hsa-miR-532-3p | ST7L |
| hsa-miR-532-3p | RHOC |
| hsa-miR-532-3p | TRIM33 |
| hsa-miR-532-3p | SIKE1 |
| hsa-miR-532-3p | NHLH2 |
| hsa-miR-532-3p | IGSF3 |
| hsa-miR-532-3p | TRIM45 |
| hsa-miR-532-3p | ZNF697 |
| hsa-miR-532-3p | NOTCH2 |
| hsa-miR-532-3p | NBPF14 |
| hsa-miR-532-3p | NBPF20 |
| hsa-miR-532-3p | HIST2H2BE |
| hsa-miR-532-3p | OTUD7B |
| hsa-miR-532-3p | APH1A |
| hsa-miR-532-3p | MCL1 |
| hsa-miR-532-3p | ENSA |
| hsa-miR-532-3p | GOLPH3L |
| hsa-miR-532-3p | LYSMD1 |
| hsa-miR-532-3p | PI4KB |
| hsa-miR-532-3p | SELENBP1 |
| hsa-miR-532-3p | GATAD2B |
| hsa-miR-532-3p | DENND4B |
| hsa-miR-532-3p | SLC39A1 |
| hsa-miR-532-3p | TPM3 |
| hsa-miR-532-3p | C1orf43 |
| hsa-miR-532-3p | UBE2Q1 |
| hsa-miR-532-3p | PBXIP1 |
| hsa-miR-532-3p | PYGO2 |
| hsa-miR-532-3p | SHC1 |
| hsa-miR-532-3p | FAM189B |
| hsa-miR-532-3p | ASH1L |
| hsa-miR-532-3p | YY1AP1 |
| hsa-miR-532-3p | KHDC4 |
| hsa-miR-532-3p | ARHGEF2 |
| hsa-miR-532-3p | MEX3A |
| hsa-miR-532-3p | SMG5 |
| hsa-miR-532-3p | MEF2D |
| hsa-miR-532-3p | HDGF |
| hsa-miR-532-3p | ETV3 |
| hsa-miR-532-3p | CRP |
| hsa-miR-532-3p | TAGLN2 |
| hsa-miR-532-3p | IGSF8 |
| hsa-miR-532-3p | DCAF8 |
| hsa-miR-532-3p | COPA |
| hsa-miR-532-3p | CD84 |
| hsa-miR-532-3p | USF1 |
| hsa-miR-532-3p | NECTIN4 |
| hsa-miR-532-3p | DEDD |
| hsa-miR-532-3p | MPZ |
| hsa-miR-532-3p | TADA1 |
| hsa-miR-532-3p | VAMP4 |
| hsa-miR-532-3p | RC3H1 |
| hsa-miR-532-3p | ABL2 |
| hsa-miR-532-3p | STX6 |
| hsa-miR-532-3p | RNASEL |
| hsa-miR-532-3p | EDEM3 |
| hsa-miR-532-3p | TRMT1L |
| hsa-miR-532-3p | ZBTB41 |
| hsa-miR-532-3p | KIF14 |
| hsa-miR-532-3p | TMEM9 |
| hsa-miR-532-3p | PHLDA3 |
| hsa-miR-532-3p | CSRP1 |
| hsa-miR-532-3p | ARL8A |
| hsa-miR-532-3p | KDM5B |
| hsa-miR-532-3p | KLHL12 |
| hsa-miR-532-3p | ETNK2 |
| hsa-miR-532-3p | PLEKHA6 |
| hsa-miR-532-3p | LRRN2 |
| hsa-miR-532-3p | RBBP5 |
| hsa-miR-532-3p | DSTYK |
| hsa-miR-532-3p | SLC45A3 |
| hsa-miR-532-3p | RAB29 |
| hsa-miR-532-3p | YOD1 |
| hsa-miR-532-3p | PLXNA2 |
| hsa-miR-532-3p | IRF6 |
| hsa-miR-532-3p | NEK2 |
| hsa-miR-532-3p | LPGAT1 |
| hsa-miR-532-3p | TMEM206 |
| hsa-miR-532-3p | NSL1 |
| hsa-miR-532-3p | PTPN14 |
| hsa-miR-532-3p | AIDA |
| hsa-miR-532-3p | WDR26 |
| hsa-miR-532-3p | ENAH |
| hsa-miR-532-3p | TMEM63A |
| hsa-miR-532-3p | PYCR2 |
| hsa-miR-532-3p | SDE2 |
| hsa-miR-532-3p | ACBD3 |
| hsa-miR-532-3p | PARP1 |
| hsa-miR-532-3p | JMJD4 |
| hsa-miR-532-3p | MRPL55 |
| hsa-miR-532-3p | TRIM11 |
| hsa-miR-532-3p | CCSAP |
| hsa-miR-532-3p | NUP133 |
| hsa-miR-532-3p | TAF5L |
| hsa-miR-532-3p | C1orf198 |
| hsa-miR-532-3p | EGLN1 |
| hsa-miR-532-3p | IRF2BP2 |
| hsa-miR-532-3p | CHML |
| hsa-miR-532-3p | CEP170 |
| hsa-miR-532-3p | AKT3 |
| hsa-miR-532-3p | ADSS |
| hsa-miR-532-3p | HNRNPU |
| hsa-miR-532-3p | ZNF496 |
| hsa-miR-532-3p | SH3BP5L |
| hsa-miR-532-3p | B3GALT6 |
| hsa-miR-532-3p | PRDM16 |
| hsa-miR-532-3p | TPRG1L |
| hsa-miR-532-3p | ESPN |
| hsa-miR-532-3p | PHF13 |
| hsa-miR-532-3p | H6PD |
| hsa-miR-532-3p | TMEM201 |
| hsa-miR-532-3p | NMNAT1 |
| hsa-miR-532-3p | KIF1B |
| hsa-miR-532-3p | PEX14 |
| hsa-miR-532-3p | AGTRAP |
| hsa-miR-532-3p | CLCN6 |
| hsa-miR-532-3p | PLOD1 |
| hsa-miR-532-3p | MFN2 |
| hsa-miR-532-3p | TNFRSF1B |
| hsa-miR-532-3p | VPS13D |
| hsa-miR-532-3p | PDPN |
| hsa-miR-532-3p | EFHD2 |
| hsa-miR-532-3p | DNAJC16 |
| hsa-miR-532-3p | DDI2 |
| hsa-miR-532-3p | SZRD1 |
| hsa-miR-532-3p | NECAP2 |
| hsa-miR-532-3p | ARHGEF10L |
| hsa-miR-532-3p | MRTO4 |
| hsa-miR-532-3p | PQLC2 |
| hsa-miR-532-3p | NBL1 |
| hsa-miR-532-3p | MINOS1-NBL1 |
| hsa-miR-532-3p | OTUD3 |
| hsa-miR-532-3p | PINK1 |
| hsa-miR-532-3p | ZBTB40 |
| hsa-miR-532-3p | EPHB2 |
| hsa-miR-532-3p | PITHD1 |
| hsa-miR-532-3p | TMEM50A |
| hsa-miR-532-3p | SELENON |
| hsa-miR-532-3p | PDIK1L |
| hsa-miR-532-3p | CEP85 |
| hsa-miR-532-3p | DHDDS |
| hsa-miR-532-3p | RPS6KA1 |
| hsa-miR-532-3p | PIGV |
| hsa-miR-532-3p | ZDHHC18 |
| hsa-miR-532-3p | TRNP1 |
| hsa-miR-532-3p | GPR3 |
| hsa-miR-532-3p | PPP1R8 |
| hsa-miR-532-3p | XKR8 |
| hsa-miR-532-3p | ATP5IF1 |
| hsa-miR-532-3p | SESN2 |
| hsa-miR-532-3p | PHACTR4 |
| hsa-miR-532-3p | TRNAU1AP |
| hsa-miR-532-3p | ZCCHC17 |
| hsa-miR-532-3p | TINAGL1 |
| hsa-miR-532-3p | KPNA6 |
| hsa-miR-532-3p | TXLNA |
| hsa-miR-532-3p | ZBTB8A |
| hsa-miR-532-3p | KIAA1522 |
| hsa-miR-532-3p | S100PBP |
| hsa-miR-532-3p | AZIN2 |
| hsa-miR-532-3p | AGO4 |
| hsa-miR-532-3p | AGO1 |
| hsa-miR-532-3p | CDCA8 |
| hsa-miR-532-3p | RLF |
| hsa-miR-532-3p | SMAP2 |
| hsa-miR-532-3p | EXO5 |
| hsa-miR-532-3p | SZT2 |
| hsa-miR-532-3p | PTPRF |
| hsa-miR-532-3p | KDM4A |
| hsa-miR-532-3p | B4GALT2 |
| hsa-miR-532-3p | RNF220 |
| hsa-miR-532-3p | MMACHC |
| hsa-miR-532-3p | RAD54L |
| hsa-miR-532-3p | NSUN4 |
| hsa-miR-532-3p | ZFYVE9 |
| hsa-miR-532-3p | ZYG11B |
| hsa-miR-532-3p | ZYG11A |
| hsa-miR-532-3p | SCP2 |
| hsa-miR-532-3p | CPT2 |
| hsa-miR-532-3p | LRRC42 |
| hsa-miR-532-3p | USP1 |
| hsa-miR-532-3p | PGM1 |
| hsa-miR-532-3p | ROR1 |
| hsa-miR-532-3p | LEPROT |
| hsa-miR-532-3p | CTH |
| hsa-miR-532-3p | TYW3 |
| hsa-miR-532-3p | MIGA1 |
| hsa-miR-532-3p | CYR61 |
| hsa-miR-532-3p | LMO4 |
| hsa-miR-532-3p | LRRC8B |
| hsa-miR-532-3p | ZNF326 |
| hsa-miR-532-3p | SNX7 |
| hsa-miR-532-3p | SLC35A3 |
| hsa-miR-532-3p | KIAA1324 |
| hsa-miR-532-3p | CELSR2 |
| hsa-miR-532-3p | CYB561D1 |
| hsa-miR-532-3p | GNAI3 |
| hsa-miR-532-3p | AMPD2 |
| hsa-miR-532-3p | CSF1 |
| hsa-miR-532-3p | RBM15 |
| hsa-miR-532-3p | CTTNBP2NL |
| hsa-miR-532-3p | LRIG2 |
| hsa-miR-532-3p | DCLRE1B |
| hsa-miR-532-3p | HIPK1 |
| hsa-miR-532-3p | VANGL1 |
| hsa-miR-532-3p | TTF2 |
| hsa-miR-532-3p | FAM46C |
| hsa-miR-532-3p | WDR3 |
| hsa-miR-532-3p | NOTCH2NL |
| hsa-miR-532-3p | TXNIP |
| hsa-miR-532-3p | PIAS3 |
| hsa-miR-532-3p | BCL9 |
| hsa-miR-532-3p | NBPF15 |
| hsa-miR-532-3p | RPRD2 |
| hsa-miR-532-3p | TARS2 |
| hsa-miR-532-3p | ANXA9 |
| hsa-miR-532-3p | GABPB2 |
| hsa-miR-532-3p | PIP5K1A |
| hsa-miR-532-3p | ZNF687 |
| hsa-miR-532-3p | CGN |
| hsa-miR-532-3p | TUFT1 |
| hsa-miR-532-3p | SNX27 |
| hsa-miR-532-3p | CHTOP |
| hsa-miR-532-3p | ATP8B2 |
| hsa-miR-532-3p | ZBTB7B |
| hsa-miR-532-3p | ADAM15 |
| hsa-miR-532-3p | EFNA3 |
| hsa-miR-532-3p | EFNA1 |
| hsa-miR-532-3p | SLC50A1 |
| hsa-miR-532-3p | HCN3 |
| hsa-miR-532-3p | RUSC1 |
| hsa-miR-532-3p | LMNA |
| hsa-miR-532-3p | SLC25A44 |
| hsa-miR-532-3p | NAXE |
| hsa-miR-532-3p | PRCC |
| hsa-miR-532-3p | PEAR1 |
| hsa-miR-532-3p | PEA15 |
| hsa-miR-532-3p | TOMM40L |
| hsa-miR-532-3p | C1orf226 |
| hsa-miR-532-3p | RGS4 |
| hsa-miR-532-3p | PBX1 |
| hsa-miR-532-3p | POGK |
| hsa-miR-532-3p | POU2F1 |
| hsa-miR-532-3p | MPZL1 |
| hsa-miR-532-3p | DCAF6 |
| hsa-miR-532-3p | GORAB |
| hsa-miR-532-3p | PRRX1 |
| hsa-miR-532-3p | PRRC2C |
| hsa-miR-532-3p | RASAL2 |
| hsa-miR-532-3p | FAM20B |
| hsa-miR-532-3p | TOR3A |
| hsa-miR-532-3p | CEP350 |
| hsa-miR-532-3p | QSOX1 |
| hsa-miR-532-3p | XPR1 |
| hsa-miR-532-3p | MR1 |
| hsa-miR-532-3p | IER5 |
| hsa-miR-532-3p | SMG7 |
| hsa-miR-532-3p | TSEN15 |
| hsa-miR-532-3p | ODR4 |
| hsa-miR-532-3p | CDC73 |
| hsa-miR-532-3p | INAVA |
| hsa-miR-532-3p | IPO9 |
| hsa-miR-532-3p | ELF3 |
| hsa-miR-532-3p | PPP1R12B |
| hsa-miR-532-3p | BTG2 |
| hsa-miR-532-3p | ATP2B4 |
| hsa-miR-532-3p | MDM4 |
| hsa-miR-532-3p | NFASC |
| hsa-miR-532-3p | MAPKAPK2 |
| hsa-miR-532-3p | DIEXF |
| hsa-miR-532-3p | PPP2R5A |
| hsa-miR-532-3p | NENF |
| hsa-miR-532-3p | ATF3 |
| hsa-miR-532-3p | PROX1 |
| hsa-miR-532-3p | CENPF |
| hsa-miR-532-3p | KCTD3 |
| hsa-miR-532-3p | SPATA17 |
| hsa-miR-532-3p | IARS2 |
| hsa-miR-532-3p | C1orf115 |
| hsa-miR-532-3p | FBXO28 |
| hsa-miR-532-3p | DEGS1 |
| hsa-miR-532-3p | EPHX1 |
| hsa-miR-532-3p | COQ8A |
| hsa-miR-532-3p | ARF1 |
| hsa-miR-532-3p | GJC2 |
| hsa-miR-532-3p | IBA57 |
| hsa-miR-532-3p | RHOU |
| hsa-miR-532-3p | GALNT2 |
| hsa-miR-532-3p | TSNAX |
| hsa-miR-532-3p | DISC1 |
| hsa-miR-532-3p | MAP3K21 |
| hsa-miR-532-3p | EDARADD |
| hsa-miR-532-3p | MTR |
| hsa-miR-532-3p | RYR2 |
| hsa-miR-532-3p | ZBTB18 |
| hsa-miR-532-3p | COX20 |
| hsa-miR-532-3p | ZNF672 |
| hsa-miR-532-3p | LARP4B |
| hsa-miR-532-3p | IL15RA |
| hsa-miR-532-3p | FRMD4A |
| hsa-miR-532-3p | NMT2 |
| hsa-miR-532-3p | FAM171A1 |
| hsa-miR-532-3p | RSU1 |
| hsa-miR-532-3p | NEBL |
| hsa-miR-532-3p | SKIDA1 |
| hsa-miR-532-3p | YME1L1 |
| hsa-miR-532-3p | JCAD |
| hsa-miR-532-3p | EPC1 |
| hsa-miR-532-3p | NRP1 |
| hsa-miR-532-3p | PARD3 |
| hsa-miR-532-3p | ZNF248 |
| hsa-miR-532-3p | ZNF25 |
| hsa-miR-532-3p | ZNF33B |
| hsa-miR-532-3p | RASGEF1A |
| hsa-miR-532-3p | CXCL12 |
| hsa-miR-532-3p | DEPP1 |
| hsa-miR-532-3p | SGMS1 |
| hsa-miR-532-3p | CCDC6 |
| hsa-miR-532-3p | RHOBTB1 |
| hsa-miR-532-3p | AIFM2 |
| hsa-miR-532-3p | SAR1A |
| hsa-miR-532-3p | PCBD1 |
| hsa-miR-532-3p | ASCC1 |
| hsa-miR-532-3p | DNAJB12 |
| hsa-miR-532-3p | DNAJC9 |
| hsa-miR-532-3p | USP54 |
| hsa-miR-532-3p | NDST2 |
| hsa-miR-532-3p | AC022400.6 |
| hsa-miR-532-3p | CAMK2G |
| hsa-miR-532-3p | DLG5 |
| hsa-miR-532-3p | ZCCHC24 |
| hsa-miR-532-3p | MAT1A |
| hsa-miR-532-3p | GLUD1 |
| hsa-miR-532-3p | HTR7 |
| hsa-miR-532-3p | PPP1R3C |
| hsa-miR-532-3p | CPEB3 |
| hsa-miR-532-3p | SORBS1 |
| hsa-miR-532-3p | TM9SF3 |
| hsa-miR-532-3p | FRAT2 |
| hsa-miR-532-3p | AVPI1 |
| hsa-miR-532-3p | DNMBP |
| hsa-miR-532-3p | CWF19L1 |
| hsa-miR-532-3p | NPM3 |
| hsa-miR-532-3p | C10orf76 |
| hsa-miR-532-3p | C10orf95 |
| hsa-miR-532-3p | ACTR1A |
| hsa-miR-532-3p | SH3PXD2A |
| hsa-miR-532-3p | SMNDC1 |
| hsa-miR-532-3p | GPAM |
| hsa-miR-532-3p | ABLIM1 |
| hsa-miR-532-3p | GFRA1 |
| hsa-miR-532-3p | CACUL1 |
| hsa-miR-532-3p | SFXN4 |
| hsa-miR-532-3p | MKI67 |
| hsa-miR-532-3p | PRR26 |
| hsa-miR-532-3p | GTPBP4 |
| hsa-miR-532-3p | WDR37 |
| hsa-miR-532-3p | NET1 |
| hsa-miR-532-3p | PFKFB3 |
| hsa-miR-532-3p | GATA3 |
| hsa-miR-532-3p | DHTKD1 |
| hsa-miR-532-3p | MCM10 |
| hsa-miR-532-3p | SUV39H2 |
| hsa-miR-532-3p | WAC |
| hsa-miR-532-3p | ZNF33A |
| hsa-miR-532-3p | ZNF37A |
| hsa-miR-532-3p | MAPK8 |
| hsa-miR-532-3p | WDFY4 |
| hsa-miR-532-3p | TFAM |
| hsa-miR-532-3p | REEP3 |
| hsa-miR-532-3p | SIRT1 |
| hsa-miR-532-3p | TET1 |
| hsa-miR-532-3p | HK1 |
| hsa-miR-532-3p | EIF4EBP2 |
| hsa-miR-532-3p | PALD1 |
| hsa-miR-532-3p | SGPL1 |
| hsa-miR-532-3p | CHST3 |
| hsa-miR-532-3p | CHCHD1 |
| hsa-miR-532-3p | PLAU |
| hsa-miR-532-3p | VCL |
| hsa-miR-532-3p | ZMIZ1 |
| hsa-miR-532-3p | PPIF |
| hsa-miR-532-3p | FAM213A |
| hsa-miR-532-3p | TSPAN14 |
| hsa-miR-532-3p | MINPP1 |
| hsa-miR-532-3p | PCGF5 |
| hsa-miR-532-3p | TNKS2 |
| hsa-miR-532-3p | 5-Mar |
| hsa-miR-532-3p | KIF11 |
| hsa-miR-532-3p | CCNJ |
| hsa-miR-532-3p | LCOR |
| hsa-miR-532-3p | ZFYVE27 |
| hsa-miR-532-3p | GOLGA7B |
| hsa-miR-532-3p | R3HCC1L |
| hsa-miR-532-3p | CNNM1 |
| hsa-miR-532-3p | SCD |
| hsa-miR-532-3p | HIF1AN |
| hsa-miR-532-3p | SEMA4G |
| hsa-miR-532-3p | SFXN3 |
| hsa-miR-532-3p | BTRC |
| hsa-miR-532-3p | NOLC1 |
| hsa-miR-532-3p | TRIM8 |
| hsa-miR-532-3p | SFXN2 |
| hsa-miR-532-3p | WBP1L |
| hsa-miR-532-3p | GSTO2 |
| hsa-miR-532-3p | MXI1 |
| hsa-miR-532-3p | DUSP5 |
| hsa-miR-532-3p | SMC3 |
| hsa-miR-532-3p | RBM20 |
| hsa-miR-532-3p | PDCD4 |
| hsa-miR-532-3p | ADRA2A |
| hsa-miR-532-3p | VTI1A |
| hsa-miR-532-3p | ADRB1 |
| hsa-miR-532-3p | TDRD1 |
| hsa-miR-532-3p | TRUB1 |
| hsa-miR-532-3p | PLEKHA1 |
| hsa-miR-532-3p | HTRA1 |
| hsa-miR-532-3p | GPR26 |
| hsa-miR-532-3p | ABRAXAS2 |
| hsa-miR-532-3p | DOCK1 |
| hsa-miR-532-3p | GLRX3 |
| hsa-miR-532-3p | INPP5A |
| hsa-miR-532-3p | MTG1 |
| hsa-miR-532-3p | AL360181.3 |
| hsa-miR-532-3p | BET1L |
| hsa-miR-532-3p | SLC25A22 |
| hsa-miR-532-3p | POLR2L |
| hsa-miR-532-3p | TOLLIP |
| hsa-miR-532-3p | IFITM10 |
| hsa-miR-532-3p | AC068580.4 |
| hsa-miR-532-3p | IGF2 |
| hsa-miR-532-3p | NAP1L4 |
| hsa-miR-532-3p | OSBPL5 |
| hsa-miR-532-3p | TRIM68 |
| hsa-miR-532-3p | TRIM3 |
| hsa-miR-532-3p | TMEM9B |
| hsa-miR-532-3p | BTBD10 |
| hsa-miR-532-3p | SOX6 |
| hsa-miR-532-3p | PIK3C2A |
| hsa-miR-532-3p | KCNJ11 |
| hsa-miR-532-3p | HPS5 |
| hsa-miR-532-3p | SPTY2D1 |
| hsa-miR-532-3p | CD59 |
| hsa-miR-532-3p | AL049629.2 |
| hsa-miR-532-3p | ALX4 |
| hsa-miR-532-3p | TP53I11 |
| hsa-miR-532-3p | AMBRA1 |
| hsa-miR-532-3p | PACSIN3 |
| hsa-miR-532-3p | CELF1 |
| hsa-miR-532-3p | MTCH2 |
| hsa-miR-532-3p | SSRP1 |
| hsa-miR-532-3p | SLC43A3 |
| hsa-miR-532-3p | MED19 |
| hsa-miR-532-3p | OSBP |
| hsa-miR-532-3p | PATL1 |
| hsa-miR-532-3p | DDB1 |
| hsa-miR-532-3p | CYB561A3 |
| hsa-miR-532-3p | CPSF7 |
| hsa-miR-532-3p | FADS1 |
| hsa-miR-532-3p | LBHD1 |
| hsa-miR-532-3p | C11orf98 |
| hsa-miR-532-3p | UBXN1 |
| hsa-miR-532-3p | LRRN4CL |
| hsa-miR-532-3p | HNRNPUL2 |
| hsa-miR-532-3p | EHD1 |
| hsa-miR-532-3p | CDCA5 |
| hsa-miR-532-3p | SYVN1 |
| hsa-miR-532-3p | MAP3K11 |
| hsa-miR-532-3p | RNASEH2C |
| hsa-miR-532-3p | AP5B1 |
| hsa-miR-532-3p | EIF1AD |
| hsa-miR-532-3p | B4GAT1 |
| hsa-miR-532-3p | PITPNM1 |
| hsa-miR-532-3p | CHKA |
| hsa-miR-532-3p | KMT5B |
| hsa-miR-532-3p | ORAOV1 |
| hsa-miR-532-3p | SHANK2 |
| hsa-miR-532-3p | DHCR7 |
| hsa-miR-532-3p | CLPB |
| hsa-miR-532-3p | PDE2A |
| hsa-miR-532-3p | FAM168A |
| hsa-miR-532-3p | RAB6A |
| hsa-miR-532-3p | COA4 |
| hsa-miR-532-3p | UCP2 |
| hsa-miR-532-3p | UCP3 |
| hsa-miR-532-3p | PGM2L1 |
| hsa-miR-532-3p | KCNE3 |
| hsa-miR-532-3p | ARRB1 |
| hsa-miR-532-3p | RSF1 |
| hsa-miR-532-3p | KCTD21 |
| hsa-miR-532-3p | GAB2 |
| hsa-miR-532-3p | RAB30 |
| hsa-miR-532-3p | CREBZF |
| hsa-miR-532-3p | FZD4 |
| hsa-miR-532-3p | CHORDC1 |
| hsa-miR-532-3p | SMCO4 |
| hsa-miR-532-3p | MTMR2 |
| hsa-miR-532-3p | PGR |
| hsa-miR-532-3p | SLC35F2 |
| hsa-miR-532-3p | KDELC2 |
| hsa-miR-532-3p | POU2AF1 |
| hsa-miR-532-3p | ZW10 |
| hsa-miR-532-3p | ZPR1 |
| hsa-miR-532-3p | APOA5 |
| hsa-miR-532-3p | SIK3 |
| hsa-miR-532-3p | PCSK7 |
| hsa-miR-532-3p | BACE1 |
| hsa-miR-532-3p | IFT46 |
| hsa-miR-532-3p | DDX6 |
| hsa-miR-532-3p | BCL9L |
| hsa-miR-532-3p | H2AFX |
| hsa-miR-532-3p | MCAM |
| hsa-miR-532-3p | USP2 |
| hsa-miR-532-3p | THY1 |
| hsa-miR-532-3p | NECTIN1 |
| hsa-miR-532-3p | SIAE |
| hsa-miR-532-3p | ROBO4 |
| hsa-miR-532-3p | CDON |
| hsa-miR-532-3p | RPUSD4 |
| hsa-miR-532-3p | SRPRA |
| hsa-miR-532-3p | ETS1 |
| hsa-miR-532-3p | ZBTB44 |
| hsa-miR-532-3p | SNX19 |
| hsa-miR-532-3p | PSMD13 |
| hsa-miR-532-3p | TSPAN4 |
| hsa-miR-532-3p | AP2A2 |
| hsa-miR-532-3p | CD81 |
| hsa-miR-532-3p | TIMM10B |
| hsa-miR-532-3p | ILK |
| hsa-miR-532-3p | TUB |
| hsa-miR-532-3p | RPL27A |
| hsa-miR-532-3p | WEE1 |
| hsa-miR-532-3p | SWAP70 |
| hsa-miR-532-3p | TEAD1 |
| hsa-miR-532-3p | FAR1 |
| hsa-miR-532-3p | NCR3LG1 |
| hsa-miR-532-3p | KCNC1 |
| hsa-miR-532-3p | NAV2 |
| hsa-miR-532-3p | PRRG4 |
| hsa-miR-532-3p | HIPK3 |
| hsa-miR-532-3p | CD44 |
| hsa-miR-532-3p | FJX1 |
| hsa-miR-532-3p | LDLRAD3 |
| hsa-miR-532-3p | CD82 |
| hsa-miR-532-3p | PRDM11 |
| hsa-miR-532-3p | CRY2 |
| hsa-miR-532-3p | SLC39A13 |
| hsa-miR-532-3p | PTPRJ |
| hsa-miR-532-3p | ZDHHC5 |
| hsa-miR-532-3p | ZFP91 |
| hsa-miR-532-3p | FAM111A |
| hsa-miR-532-3p | STX3 |
| hsa-miR-532-3p | TMEM132A |
| hsa-miR-532-3p | TKFC |
| hsa-miR-532-3p | MYRF |
| hsa-miR-532-3p | FEN1 |
| hsa-miR-532-3p | FADS2 |
| hsa-miR-532-3p | INCENP |
| hsa-miR-532-3p | TMEM179B |
| hsa-miR-532-3p | SLC22A9 |
| hsa-miR-532-3p | MARK2 |
| hsa-miR-532-3p | NAA40 |
| hsa-miR-532-3p | ESRRA |
| hsa-miR-532-3p | RPS6KA4 |
| hsa-miR-532-3p | ARL2 |
| hsa-miR-532-3p | MRPL49 |
| hsa-miR-532-3p | DPF2 |
| hsa-miR-532-3p | FRMD8 |
| hsa-miR-532-3p | SART1 |
| hsa-miR-532-3p | BANF1 |
| hsa-miR-532-3p | PACS1 |
| hsa-miR-532-3p | BBS1 |
| hsa-miR-532-3p | AP002748.4 |
| hsa-miR-532-3p | RBM14-RBM4 |
| hsa-miR-532-3p | LRFN4 |
| hsa-miR-532-3p | SYT12 |
| hsa-miR-532-3p | NDUFV1 |
| hsa-miR-532-3p | ALDH3B1 |
| hsa-miR-532-3p | LRP5 |
| hsa-miR-532-3p | PPP6R3 |
| hsa-miR-532-3p | CCND1 |
| hsa-miR-532-3p | PPFIA1 |
| hsa-miR-532-3p | CTTN |
| hsa-miR-532-3p | FAM86C1 |
| hsa-miR-532-3p | RNF121 |
| hsa-miR-532-3p | RELT |
| hsa-miR-532-3p | PPME1 |
| hsa-miR-532-3p | POLD3 |
| hsa-miR-532-3p | SPCS2 |
| hsa-miR-532-3p | NEU3 |
| hsa-miR-532-3p | RPS3 |
| hsa-miR-532-3p | EMSY |
| hsa-miR-532-3p | TSKU |
| hsa-miR-532-3p | DDIAS |
| hsa-miR-532-3p | ANKRD42 |
| hsa-miR-532-3p | PRSS23 |
| hsa-miR-532-3p | C11orf54 |
| hsa-miR-532-3p | AP001273.2 |
| hsa-miR-532-3p | PIWIL4 |
| hsa-miR-532-3p | FUT4 |
| hsa-miR-532-3p | AMOTL1 |
| hsa-miR-532-3p | CEP57 |
| hsa-miR-532-3p | ACAT1 |
| hsa-miR-532-3p | ZC3H12C |
| hsa-miR-532-3p | SIK2 |
| hsa-miR-532-3p | PAFAH1B2 |
| hsa-miR-532-3p | KMT2A |
| hsa-miR-532-3p | PHLDB1 |
| hsa-miR-532-3p | TRAPPC4 |
| hsa-miR-532-3p | C2CD2L |
| hsa-miR-532-3p | HINFP |
| hsa-miR-532-3p | CBL |
| hsa-miR-532-3p | RNF26 |
| hsa-miR-532-3p | ARHGEF12 |
| hsa-miR-532-3p | SORL1 |
| hsa-miR-532-3p | UBASH3B |
| hsa-miR-532-3p | EI24 |
| hsa-miR-532-3p | FOXRED1 |
| hsa-miR-532-3p | BARX2 |
| hsa-miR-532-3p | VPS26B |
| hsa-miR-532-3p | GLB1L2 |
| hsa-miR-532-3p | KDM5A |
| hsa-miR-532-3p | FBXL14 |
| hsa-miR-532-3p | FOXM1 |
| hsa-miR-532-3p | PARP11 |
| hsa-miR-532-3p | IFFO1 |
| hsa-miR-532-3p | ING4 |
| hsa-miR-532-3p | ZNF384 |
| hsa-miR-532-3p | PHB2 |
| hsa-miR-532-3p | LPCAT3 |
| hsa-miR-532-3p | SLC2A14 |
| hsa-miR-532-3p | SLC2A3 |
| hsa-miR-532-3p | AICDA |
| hsa-miR-532-3p | MAGOHB |
| hsa-miR-532-3p | DUSP16 |
| hsa-miR-532-3p | BCAT1 |
| hsa-miR-532-3p | CAPRIN2 |
| hsa-miR-532-3p | DENND5B |
| hsa-miR-532-3p | AMN1 |
| hsa-miR-532-3p | GXYLT1 |
| hsa-miR-532-3p | SLC38A1 |
| hsa-miR-532-3p | SLC38A2 |
| hsa-miR-532-3p | RAPGEF3 |
| hsa-miR-532-3p | HDAC7 |
| hsa-miR-532-3p | VDR |
| hsa-miR-532-3p | CCNT1 |
| hsa-miR-532-3p | ADCY6 |
| hsa-miR-532-3p | ARF3 |
| hsa-miR-532-3p | KMT2D |
| hsa-miR-532-3p | MCRS1 |
| hsa-miR-532-3p | RACGAP1 |
| hsa-miR-532-3p | CERS5 |
| hsa-miR-532-3p | LIMA1 |
| hsa-miR-532-3p | GALNT6 |
| hsa-miR-532-3p | FIGNL2 |
| hsa-miR-532-3p | KRT80 |
| hsa-miR-532-3p | KRT8 |
| hsa-miR-532-3p | MAP3K12 |
| hsa-miR-532-3p | CALCOCO1 |
| hsa-miR-532-3p | SMUG1 |
| hsa-miR-532-3p | SMARCC2 |
| hsa-miR-532-3p | ANKRD52 |
| hsa-miR-532-3p | PAN2 |
| hsa-miR-532-3p | PRIM1 |
| hsa-miR-532-3p | ZBTB39 |
| hsa-miR-532-3p | NEMP1 |
| hsa-miR-532-3p | STAT6 |
| hsa-miR-532-3p | STAC3 |
| hsa-miR-532-3p | CTDSP2 |
| hsa-miR-532-3p | LLPH |
| hsa-miR-532-3p | CPM |
| hsa-miR-532-3p | PHLDA1 |
| hsa-miR-532-3p | E2F7 |
| hsa-miR-532-3p | PAWR |
| hsa-miR-532-3p | PPP1R12A |
| hsa-miR-532-3p | KITLG |
| hsa-miR-532-3p | POC1B |
| hsa-miR-532-3p | ATP2B1 |
| hsa-miR-532-3p | DCN |
| hsa-miR-532-3p | UBE2N |
| hsa-miR-532-3p | USP44 |
| hsa-miR-532-3p | LTA4H |
| hsa-miR-532-3p | GNPTAB |
| hsa-miR-532-3p | IGF1 |
| hsa-miR-532-3p | NT5DC3 |
| hsa-miR-532-3p | APPL2 |
| hsa-miR-532-3p | PRDM4 |
| hsa-miR-532-3p | TMEM119 |
| hsa-miR-532-3p | CORO1C |
| hsa-miR-532-3p | ARPC3 |
| hsa-miR-532-3p | FAM109A |
| hsa-miR-532-3p | TMEM116 |
| hsa-miR-532-3p | C12orf49 |
| hsa-miR-532-3p | HRK |
| hsa-miR-532-3p | FBXO21 |
| hsa-miR-532-3p | RAB35 |
| hsa-miR-532-3p | PXN |
| hsa-miR-532-3p | SPPL3 |
| hsa-miR-532-3p | C12orf43 |
| hsa-miR-532-3p | OASL |
| hsa-miR-532-3p | KDM2B |
| hsa-miR-532-3p | VPS33A |
| hsa-miR-532-3p | VPS37B |
| hsa-miR-532-3p | PITPNM2 |
| hsa-miR-532-3p | SBNO1 |
| hsa-miR-532-3p | SCARB1 |
| hsa-miR-532-3p | DDX51 |
| hsa-miR-532-3p | POLE |
| hsa-miR-532-3p | ANKLE2 |
| hsa-miR-532-3p | GOLGA3 |
| hsa-miR-532-3p | ZNF605 |
| hsa-miR-532-3p | WNK1 |
| hsa-miR-532-3p | ADIPOR2 |
| hsa-miR-532-3p | CCND2 |
| hsa-miR-532-3p | TIGAR |
| hsa-miR-532-3p | RAD51AP1 |
| hsa-miR-532-3p | NCAPD2 |
| hsa-miR-532-3p | COPS7A |
| hsa-miR-532-3p | PTMS |
| hsa-miR-532-3p | P3H3 |
| hsa-miR-532-3p | ENO2 |
| hsa-miR-532-3p | CLSTN3 |
| hsa-miR-532-3p | PEX5 |
| hsa-miR-532-3p | RIMKLB |
| hsa-miR-532-3p | GABARAPL1 |
| hsa-miR-532-3p | BORCS5 |
| hsa-miR-532-3p | CDKN1B |
| hsa-miR-532-3p | GPRC5A |
| hsa-miR-532-3p | EMP1 |
| hsa-miR-532-3p | H2AFJ |
| hsa-miR-532-3p | AEBP2 |
| hsa-miR-532-3p | PDE3A |
| hsa-miR-532-3p | GOLT1B |
| hsa-miR-532-3p | ETNK1 |
| hsa-miR-532-3p | KLHL42 |
| hsa-miR-532-3p | CCDC91 |
| hsa-miR-532-3p | BICD1 |
| hsa-miR-532-3p | ALG10B |
| hsa-miR-532-3p | SLC48A1 |
| hsa-miR-532-3p | TMEM106C |
| hsa-miR-532-3p | PFKM |
| hsa-miR-532-3p | TROAP |
| hsa-miR-532-3p | DNAJC22 |
| hsa-miR-532-3p | TMBIM6 |
| hsa-miR-532-3p | SMARCD1 |
| hsa-miR-532-3p | LARP4 |
| hsa-miR-532-3p | METTL7A |
| hsa-miR-532-3p | LETMD1 |
| hsa-miR-532-3p | ACVRL1 |
| hsa-miR-532-3p | ACVR1B |
| hsa-miR-532-3p | NR4A1 |
| hsa-miR-532-3p | KRT18 |
| hsa-miR-532-3p | EIF4B |
| hsa-miR-532-3p | ZNF740 |
| hsa-miR-532-3p | SP1 |
| hsa-miR-532-3p | HOXC13 |
| hsa-miR-532-3p | HOXC10 |
| hsa-miR-532-3p | HOXC6 |
| hsa-miR-532-3p | HOXC4 |
| hsa-miR-532-3p | HNRNPA1 |
| hsa-miR-532-3p | COPZ1 |
| hsa-miR-532-3p | CDK2 |
| hsa-miR-532-3p | ERBB3 |
| hsa-miR-532-3p | PA2G4 |
| hsa-miR-532-3p | MYL6 |
| hsa-miR-532-3p | NABP2 |
| hsa-miR-532-3p | LRP1 |
| hsa-miR-532-3p | MARS |
| hsa-miR-532-3p | MBD6 |
| hsa-miR-532-3p | KIF5A |
| hsa-miR-532-3p | TSPAN31 |
| hsa-miR-532-3p | 9-Mar |
| hsa-miR-532-3p | MON2 |
| hsa-miR-532-3p | HMGA2 |
| hsa-miR-532-3p | CAND1 |
| hsa-miR-532-3p | DYRK2 |
| hsa-miR-532-3p | CPSF6 |
| hsa-miR-532-3p | RAB3IP |
| hsa-miR-532-3p | ZDHHC17 |
| hsa-miR-532-3p | TMTC3 |
| hsa-miR-532-3p | MRPL42 |
| hsa-miR-532-3p | SOCS2 |
| hsa-miR-532-3p | PLXNC1 |
| hsa-miR-532-3p | DRAM1 |
| hsa-miR-532-3p | HSP90B1 |
| hsa-miR-532-3p | TDG |
| hsa-miR-532-3p | POLR3B |
| hsa-miR-532-3p | RIC8B |
| hsa-miR-532-3p | ACACB |
| hsa-miR-532-3p | UBE3B |
| hsa-miR-532-3p | SH2B3 |
| hsa-miR-532-3p | TRAFD1 |
| hsa-miR-532-3p | OAS2 |
| hsa-miR-532-3p | FBXW8 |
| hsa-miR-532-3p | RFC5 |
| hsa-miR-532-3p | PEBP1 |
| hsa-miR-532-3p | SUDS3 |
| hsa-miR-532-3p | HSPB8 |
| hsa-miR-532-3p | DYNLL1 |
| hsa-miR-532-3p | MLEC |
| hsa-miR-532-3p | UNC119B |
| hsa-miR-532-3p | RNF34 |
| hsa-miR-532-3p | ORAI1 |
| hsa-miR-532-3p | BCL7A |
| hsa-miR-532-3p | MLXIP |
| hsa-miR-532-3p | OGFOD2 |
| hsa-miR-532-3p | C12orf65 |
| hsa-miR-532-3p | KMT5A |
| hsa-miR-532-3p | TMED2 |
| hsa-miR-532-3p | BRI3BP |
| hsa-miR-532-3p | RAN |
| hsa-miR-532-3p | SFSWAP |
| hsa-miR-532-3p | ZNF84 |
| hsa-miR-532-3p | XPO4 |
| hsa-miR-532-3p | USP12 |
| hsa-miR-532-3p | FLT1 |
| hsa-miR-532-3p | SLC7A1 |
| hsa-miR-532-3p | UBL3 |
| hsa-miR-532-3p | KATNAL1 |
| hsa-miR-532-3p | N4BP2L1 |
| hsa-miR-532-3p | FOXO1 |
| hsa-miR-532-3p | KBTBD6 |
| hsa-miR-532-3p | SLC25A30 |
| hsa-miR-532-3p | VPS36 |
| hsa-miR-532-3p | KCTD12 |
| hsa-miR-532-3p | POU4F1 |
| hsa-miR-532-3p | RNF219 |
| hsa-miR-532-3p | SLITRK6 |
| hsa-miR-532-3p | STK24 |
| hsa-miR-532-3p | ZIC5 |
| hsa-miR-532-3p | IRS2 |
| hsa-miR-532-3p | TUBGCP3 |
| hsa-miR-532-3p | RASA3 |
| hsa-miR-532-3p | MPHOSPH8 |
| hsa-miR-532-3p | MRPL57 |
| hsa-miR-532-3p | SPATA13 |
| hsa-miR-532-3p | WASF3 |
| hsa-miR-532-3p | COG6 |
| hsa-miR-532-3p | NAA16 |
| hsa-miR-532-3p | TNFSF11 |
| hsa-miR-532-3p | COG3 |
| hsa-miR-532-3p | RB1 |
| hsa-miR-532-3p | BORA |
| hsa-miR-532-3p | LMO7 |
| hsa-miR-532-3p | RAP2A |
| hsa-miR-532-3p | IPO5 |
| hsa-miR-532-3p | ARHGEF7 |
| hsa-miR-532-3p | ATP11A |
| hsa-miR-532-3p | TEP1 |
| hsa-miR-532-3p | OSGEP |
| hsa-miR-532-3p | NDRG2 |
| hsa-miR-532-3p | RBM23 |
| hsa-miR-532-3p | NEDD8 |
| hsa-miR-532-3p | CBLN3 |
| hsa-miR-532-3p | HECTD1 |
| hsa-miR-532-3p | HEATR5A |
| hsa-miR-532-3p | AL139353.1 |
| hsa-miR-532-3p | KLHL28 |
| hsa-miR-532-3p | SOS2 |
| hsa-miR-532-3p | SAV1 |
| hsa-miR-532-3p | ERO1A |
| hsa-miR-532-3p | DDHD1 |
| hsa-miR-532-3p | SGPP1 |
| hsa-miR-532-3p | RAB15 |
| hsa-miR-532-3p | MAX |
| hsa-miR-532-3p | ATP6V1D |
| hsa-miR-532-3p | PLEK2 |
| hsa-miR-532-3p | VTI1B |
| hsa-miR-532-3p | ACTN1 |
| hsa-miR-532-3p | SYNJ2BP |
| hsa-miR-532-3p | MED6 |
| hsa-miR-532-3p | MAP3K9 |
| hsa-miR-532-3p | ELMSAN1 |
| hsa-miR-532-3p | MLH3 |
| hsa-miR-532-3p | NEK9 |
| hsa-miR-532-3p | TMED10 |
| hsa-miR-532-3p | ANGEL1 |
| hsa-miR-532-3p | POMT2 |
| hsa-miR-532-3p | VIPAS39 |
| hsa-miR-532-3p | ISM2 |
| hsa-miR-532-3p | SPTLC2 |
| hsa-miR-532-3p | GTF2A1 |
| hsa-miR-532-3p | SEL1L |
| hsa-miR-532-3p | FOXN3 |
| hsa-miR-532-3p | EFCAB11 |
| hsa-miR-532-3p | CCDC88C |
| hsa-miR-532-3p | FBLN5 |
| hsa-miR-532-3p | ITPK1 |
| hsa-miR-532-3p | BTBD7 |
| hsa-miR-532-3p | DICER1 |
| hsa-miR-532-3p | BCL11B |
| hsa-miR-532-3p | XRCC3 |
| hsa-miR-532-3p | PPP1R13B |
| hsa-miR-532-3p | BRF1 |
| hsa-miR-532-3p | MMP14 |
| hsa-miR-532-3p | PABPN1 |
| hsa-miR-532-3p | DCAF11 |
| hsa-miR-532-3p | IRF9 |
| hsa-miR-532-3p | AL136295.5 |
| hsa-miR-532-3p | GMPR2 |
| hsa-miR-532-3p | NYNRIN |
| hsa-miR-532-3p | KHNYN |
| hsa-miR-532-3p | G2E3 |
| hsa-miR-532-3p | AP4S1 |
| hsa-miR-532-3p | NUBPL |
| hsa-miR-532-3p | FAM177A1 |
| hsa-miR-532-3p | PNN |
| hsa-miR-532-3p | CTAGE5 |
| hsa-miR-532-3p | FRMD6 |
| hsa-miR-532-3p | GPR137C |
| hsa-miR-532-3p | STYX |
| hsa-miR-532-3p | SAMD4A |
| hsa-miR-532-3p | MAPK1IP1L |
| hsa-miR-532-3p | SYNE2 |
| hsa-miR-532-3p | MTHFD1 |
| hsa-miR-532-3p | CHURC1 |
| hsa-miR-532-3p | MPP5 |
| hsa-miR-532-3p | EXD2 |
| hsa-miR-532-3p | SLC39A9 |
| hsa-miR-532-3p | SUSD6 |
| hsa-miR-532-3p | SMOC1 |
| hsa-miR-532-3p | PCNX1 |
| hsa-miR-532-3p | PTGR2 |
| hsa-miR-532-3p | FCF1 |
| hsa-miR-532-3p | DLST |
| hsa-miR-532-3p | EIF2B2 |
| hsa-miR-532-3p | VASH1 |
| hsa-miR-532-3p | CIPC |
| hsa-miR-532-3p | ZC3H14 |
| hsa-miR-532-3p | TTC8 |
| hsa-miR-532-3p | CPSF2 |
| hsa-miR-532-3p | DYNC1H1 |
| hsa-miR-532-3p | WDR20 |
| hsa-miR-532-3p | ZNF839 |
| hsa-miR-532-3p | TECPR2 |
| hsa-miR-532-3p | RCOR1 |
| hsa-miR-532-3p | EIF5 |
| hsa-miR-532-3p | MARK3 |
| hsa-miR-532-3p | TRMT61A |
| hsa-miR-532-3p | APOPT1 |
| hsa-miR-532-3p | ZFYVE21 |
| hsa-miR-532-3p | KIF26A |
| hsa-miR-532-3p | ZBTB42 |
| hsa-miR-532-3p | CRIP2 |
| hsa-miR-532-3p | TMEM121 |
| hsa-miR-532-3p | NIPA1 |
| hsa-miR-532-3p | KATNBL1 |
| hsa-miR-532-3p | GOLGA8A |
| hsa-miR-532-3p | BMF |
| hsa-miR-532-3p | INO80 |
| hsa-miR-532-3p | ZNF106 |
| hsa-miR-532-3p | LRRC57 |
| hsa-miR-532-3p | CDAN1 |
| hsa-miR-532-3p | ZSCAN29 |
| hsa-miR-532-3p | FBN1 |
| hsa-miR-532-3p | TNFAIP8L3 |
| hsa-miR-532-3p | CCPG1 |
| hsa-miR-532-3p | PRTG |
| hsa-miR-532-3p | RFX7 |
| hsa-miR-532-3p | ALDH1A2 |
| hsa-miR-532-3p | ADAM10 |
| hsa-miR-532-3p | C2CD4B |
| hsa-miR-532-3p | CA12 |
| hsa-miR-532-3p | CSNK1G1 |
| hsa-miR-532-3p | PCLAF |
| hsa-miR-532-3p | OAZ2 |
| hsa-miR-532-3p | RBPMS2 |
| hsa-miR-532-3p | PDCD7 |
| hsa-miR-532-3p | PARP16 |
| hsa-miR-532-3p | IGDCC3 |
| hsa-miR-532-3p | DPP8 |
| hsa-miR-532-3p | AAGAB |
| hsa-miR-532-3p | CALML4 |
| hsa-miR-532-3p | AC107871.1 |
| hsa-miR-532-3p | CLN6 |
| hsa-miR-532-3p | ITGA11 |
| hsa-miR-532-3p | TLE3 |
| hsa-miR-532-3p | UACA |
| hsa-miR-532-3p | NPTN |
| hsa-miR-532-3p | UBL7 |
| hsa-miR-532-3p | EDC3 |
| hsa-miR-532-3p | ULK3 |
| hsa-miR-532-3p | FAM219B |
| hsa-miR-532-3p | PTPN9 |
| hsa-miR-532-3p | CSPG4 |
| hsa-miR-532-3p | PEAK1 |
| hsa-miR-532-3p | TBC1D2B |
| hsa-miR-532-3p | MESD |
| hsa-miR-532-3p | HOMER2 |
| hsa-miR-532-3p | HDGFL3 |
| hsa-miR-532-3p | WDR73 |
| hsa-miR-532-3p | DET1 |
| hsa-miR-532-3p | KIF7 |
| hsa-miR-532-3p | PEX11A |
| hsa-miR-532-3p | PRC1 |
| hsa-miR-532-3p | AC068831.7 |
| hsa-miR-532-3p | LYSMD4 |
| hsa-miR-532-3p | TM2D3 |
| hsa-miR-532-3p | TUBGCP5 |
| hsa-miR-532-3p | GOLGA8I |
| hsa-miR-532-3p | KLF13 |
| hsa-miR-532-3p | GREM1 |
| hsa-miR-532-3p | PGBD4 |
| hsa-miR-532-3p | C15orf41 |
| hsa-miR-532-3p | SPRED1 |
| hsa-miR-532-3p | THBS1 |
| hsa-miR-532-3p | BAHD1 |
| hsa-miR-532-3p | RAD51 |
| hsa-miR-532-3p | AC012476.1 |
| hsa-miR-532-3p | ZFYVE19 |
| hsa-miR-532-3p | SPINT1 |
| hsa-miR-532-3p | RTF1 |
| hsa-miR-532-3p | MGA |
| hsa-miR-532-3p | SNAP23 |
| hsa-miR-532-3p | HAUS2 |
| hsa-miR-532-3p | TUBGCP4 |
| hsa-miR-532-3p | MAP1A |
| hsa-miR-532-3p | SERF2 |
| hsa-miR-532-3p | EIF3J |
| hsa-miR-532-3p | BLOC1S6 |
| hsa-miR-532-3p | DTWD1 |
| hsa-miR-532-3p | USP8 |
| hsa-miR-532-3p | AP4E1 |
| hsa-miR-532-3p | TCF12 |
| hsa-miR-532-3p | CGNL1 |
| hsa-miR-532-3p | AQP9 |
| hsa-miR-532-3p | LACTB |
| hsa-miR-532-3p | RAB8B |
| hsa-miR-532-3p | ZNF609 |
| hsa-miR-532-3p | HACD3 |
| hsa-miR-532-3p | SMAD3 |
| hsa-miR-532-3p | GLCE |
| hsa-miR-532-3p | PAQR5 |
| hsa-miR-532-3p | KIF23 |
| hsa-miR-532-3p | THSD4 |
| hsa-miR-532-3p | ARIH1 |
| hsa-miR-532-3p | NEO1 |
| hsa-miR-532-3p | CD276 |
| hsa-miR-532-3p | SCAMP5 |
| hsa-miR-532-3p | PPCDC |
| hsa-miR-532-3p | NEIL1 |
| hsa-miR-532-3p | SNX33 |
| hsa-miR-532-3p | CHRNA5 |
| hsa-miR-532-3p | TMED3 |
| hsa-miR-532-3p | ARNT2 |
| hsa-miR-532-3p | CEMIP |
| hsa-miR-532-3p | ZSCAN2 |
| hsa-miR-532-3p | ZNF592 |
| hsa-miR-532-3p | PDE8A |
| hsa-miR-532-3p | AKAP13 |
| hsa-miR-532-3p | ABHD2 |
| hsa-miR-532-3p | FANCI |
| hsa-miR-532-3p | TICRR |
| hsa-miR-532-3p | MESP2 |
| hsa-miR-532-3p | SEMA4B |
| hsa-miR-532-3p | NGRN |
| hsa-miR-532-3p | AC091167.2 |
| hsa-miR-532-3p | IQGAP1 |
| hsa-miR-532-3p | CRTC3 |
| hsa-miR-532-3p | FURIN |
| hsa-miR-532-3p | MAN2A2 |
| hsa-miR-532-3p | SV2B |
| hsa-miR-532-3p | CHD2 |
| hsa-miR-532-3p | NR2F2 |
| hsa-miR-532-3p | ARRDC4 |
| hsa-miR-532-3p | IGF1R |
| hsa-miR-532-3p | SYNM |
| hsa-miR-532-3p | POLR3K |
| hsa-miR-532-3p | RHBDF1 |
| hsa-miR-532-3p | TMEM8A |
| hsa-miR-532-3p | RPUSD1 |
| hsa-miR-532-3p | UNKL |
| hsa-miR-532-3p | CLCN7 |
| hsa-miR-532-3p | PGP |
| hsa-miR-532-3p | RNPS1 |
| hsa-miR-532-3p | ELOB |
| hsa-miR-532-3p | PKMYT1 |
| hsa-miR-532-3p | HCFC1R1 |
| hsa-miR-532-3p | TFAP4 |
| hsa-miR-532-3p | CDIP1 |
| hsa-miR-532-3p | ZNF500 |
| hsa-miR-532-3p | GLYR1 |
| hsa-miR-532-3p | CARHSP1 |
| hsa-miR-532-3p | USP7 |
| hsa-miR-532-3p | EMP2 |
| hsa-miR-532-3p | RSL1D1 |
| hsa-miR-532-3p | PARN |
| hsa-miR-532-3p | FOPNL |
| hsa-miR-532-3p | XYLT1 |
| hsa-miR-532-3p | RPS15A |
| hsa-miR-532-3p | ARL6IP1 |
| hsa-miR-532-3p | SMG1 |
| hsa-miR-532-3p | GDE1 |
| hsa-miR-532-3p | USP31 |
| hsa-miR-532-3p | EARS2 |
| hsa-miR-532-3p | GTF3C1 |
| hsa-miR-532-3p | GSG1L |
| hsa-miR-532-3p | SULT1A1 |
| hsa-miR-532-3p | CDIPT |
| hsa-miR-532-3p | FAM57B |
| hsa-miR-532-3p | TBC1D10B |
| hsa-miR-532-3p | SEPHS2 |
| hsa-miR-532-3p | ZNF768 |
| hsa-miR-532-3p | ZNF785 |
| hsa-miR-532-3p | PRSS8 |
| hsa-miR-532-3p | PRSS36 |
| hsa-miR-532-3p | SHCBP1 |
| hsa-miR-532-3p | NETO2 |
| hsa-miR-532-3p | SIAH1 |
| hsa-miR-532-3p | RPGRIP1L |
| hsa-miR-532-3p | CES1 |
| hsa-miR-532-3p | AMFR |
| hsa-miR-532-3p | FAM192A |
| hsa-miR-532-3p | CSNK2A2 |
| hsa-miR-532-3p | SLC38A7 |
| hsa-miR-532-3p | TK2 |
| hsa-miR-532-3p | CMTM4 |
| hsa-miR-532-3p | DYNC1LI2 |
| hsa-miR-532-3p | KIAA0895L |
| hsa-miR-532-3p | ENKD1 |
| hsa-miR-532-3p | DDX28 |
| hsa-miR-532-3p | ESRP2 |
| hsa-miR-532-3p | SLC7A6OS |
| hsa-miR-532-3p | CHTF8 |
| hsa-miR-532-3p | NQO1 |
| hsa-miR-532-3p | AARS |
| hsa-miR-532-3p | ST3GAL2 |
| hsa-miR-532-3p | MTSS1L |
| hsa-miR-532-3p | AP1G1 |
| hsa-miR-532-3p | ZFHX3 |
| hsa-miR-532-3p | GLG1 |
| hsa-miR-532-3p | RFWD3 |
| hsa-miR-532-3p | SDR42E1 |
| hsa-miR-532-3p | HSDL1 |
| hsa-miR-532-3p | TLDC1 |
| hsa-miR-532-3p | FBXO31 |
| hsa-miR-532-3p | ZCCHC14 |
| hsa-miR-532-3p | SLC7A5 |
| hsa-miR-532-3p | CHMP1A |
| hsa-miR-532-3p | FANCA |
| hsa-miR-532-3p | CENPBD1 |
| hsa-miR-532-3p | PIGQ |
| hsa-miR-532-3p | RHOT2 |
| hsa-miR-532-3p | CACNA1H |
| hsa-miR-532-3p | CRAMP1 |
| hsa-miR-532-3p | AL031708.1 |
| hsa-miR-532-3p | JPT2 |
| hsa-miR-532-3p | MAPK8IP3 |
| hsa-miR-532-3p | FAHD1 |
| hsa-miR-532-3p | CCNF |
| hsa-miR-532-3p | PDPK1 |
| hsa-miR-532-3p | KCTD5 |
| hsa-miR-532-3p | SRRM2 |
| hsa-miR-532-3p | FLYWCH1 |
| hsa-miR-532-3p | PAQR4 |
| hsa-miR-532-3p | NAA60 |
| hsa-miR-532-3p | GLIS2 |
| hsa-miR-532-3p | DNAJA3 |
| hsa-miR-532-3p | MGRN1 |
| hsa-miR-532-3p | UBN1 |
| hsa-miR-532-3p | RBFOX1 |
| hsa-miR-532-3p | ABAT |
| hsa-miR-532-3p | PMM2 |
| hsa-miR-532-3p | CLEC16A |
| hsa-miR-532-3p | SNN |
| hsa-miR-532-3p | SNX29 |
| hsa-miR-532-3p | PDXDC1 |
| hsa-miR-532-3p | C16orf45 |
| hsa-miR-532-3p | ITPRIPL2 |
| hsa-miR-532-3p | CCP110 |
| hsa-miR-532-3p | VPS35L |
| hsa-miR-532-3p | TMEM159 |
| hsa-miR-532-3p | MOSMO |
| hsa-miR-532-3p | UBFD1 |
| hsa-miR-532-3p | TNRC6A |
| hsa-miR-532-3p | KDM8 |
| hsa-miR-532-3p | SBK1 |
| hsa-miR-532-3p | ATXN2L |
| hsa-miR-532-3p | NFATC2IP |
| hsa-miR-532-3p | QPRT |
| hsa-miR-532-3p | MVP |
| hsa-miR-532-3p | TAOK2 |
| hsa-miR-532-3p | ZNF48 |
| hsa-miR-532-3p | ZNF771 |
| hsa-miR-532-3p | FBRS |
| hsa-miR-532-3p | FBXL19 |
| hsa-miR-532-3p | HSD3B7 |
| hsa-miR-532-3p | ZNF267 |
| hsa-miR-532-3p | ORC6 |
| hsa-miR-532-3p | LONP2 |
| hsa-miR-532-3p | CNEP1R1 |
| hsa-miR-532-3p | PAPD5 |
| hsa-miR-532-3p | ADCY7 |
| hsa-miR-532-3p | FTO |
| hsa-miR-532-3p | OGFOD1 |
| hsa-miR-532-3p | CX3CL1 |
| hsa-miR-532-3p | GINS3 |
| hsa-miR-532-3p | NOL3 |
| hsa-miR-532-3p | NUTF2 |
| hsa-miR-532-3p | PSKH1 |
| hsa-miR-532-3p | NFATC3 |
| hsa-miR-532-3p | SLC7A6 |
| hsa-miR-532-3p | ZFP90 |
| hsa-miR-532-3p | HAS3 |
| hsa-miR-532-3p | SNTB2 |
| hsa-miR-532-3p | VPS4A |
| hsa-miR-532-3p | NIP7 |
| hsa-miR-532-3p | CYB5B |
| hsa-miR-532-3p | NFAT5 |
| hsa-miR-532-3p | PDPR |
| hsa-miR-532-3p | DDX19A |
| hsa-miR-532-3p | SF3B3 |
| hsa-miR-532-3p | MARVELD3 |
| hsa-miR-532-3p | ATXN1L |
| hsa-miR-532-3p | IST1 |
| hsa-miR-532-3p | DHODH |
| hsa-miR-532-3p | ZNRF1 |
| hsa-miR-532-3p | MON1B |
| hsa-miR-532-3p | GAN |
| hsa-miR-532-3p | CMIP |
| hsa-miR-532-3p | CDH13 |
| hsa-miR-532-3p | WFDC1 |
| hsa-miR-532-3p | KIAA0513 |
| hsa-miR-532-3p | GSE1 |
| hsa-miR-532-3p | MAP1LC3B |
| hsa-miR-532-3p | RPL13 |
| hsa-miR-532-3p | SPATA33 |
| hsa-miR-532-3p | CDK10 |
| hsa-miR-532-3p | ZNF276 |
| hsa-miR-532-3p | SPIRE2 |
| hsa-miR-532-3p | GAS8 |
| hsa-miR-532-3p | RPH3AL |
| hsa-miR-532-3p | RFLNB |
| hsa-miR-532-3p | ABR |
| hsa-miR-532-3p | CRK |
| hsa-miR-532-3p | MYO1C |
| hsa-miR-532-3p | PITPNA |
| hsa-miR-532-3p | SMYD4 |
| hsa-miR-532-3p | TSR1 |
| hsa-miR-532-3p | MNT |
| hsa-miR-532-3p | CLUH |
| hsa-miR-532-3p | SHPK |
| hsa-miR-532-3p | AC027796.3 |
| hsa-miR-532-3p | ATP2A3 |
| hsa-miR-532-3p | ZZEF1 |
| hsa-miR-532-3p | CAMTA2 |
| hsa-miR-532-3p | DHX33 |
| hsa-miR-532-3p | KIAA0753 |
| hsa-miR-532-3p | DVL2 |
| hsa-miR-532-3p | PHF23 |
| hsa-miR-532-3p | CTDNEP1 |
| hsa-miR-532-3p | CLDN7 |
| hsa-miR-532-3p | NEURL4 |
| hsa-miR-532-3p | ZBTB4 |
| hsa-miR-532-3p | FXR2 |
| hsa-miR-532-3p | TP53 |
| hsa-miR-532-3p | PER1 |
| hsa-miR-532-3p | VAMP2 |
| hsa-miR-532-3p | BORCS6 |
| hsa-miR-532-3p | RASD1 |
| hsa-miR-532-3p | SREBF1 |
| hsa-miR-532-3p | AKAP10 |
| hsa-miR-532-3p | USP22 |
| hsa-miR-532-3p | NATD1 |
| hsa-miR-532-3p | UNC119 |
| hsa-miR-532-3p | ALDOC |
| hsa-miR-532-3p | SGK494 |
| hsa-miR-532-3p | KIAA0100 |
| hsa-miR-532-3p | PHF12 |
| hsa-miR-532-3p | MYO18A |
| hsa-miR-532-3p | TIAF1 |
| hsa-miR-532-3p | NUFIP2 |
| hsa-miR-532-3p | SLC6A4 |
| hsa-miR-532-3p | BLMH |
| hsa-miR-532-3p | MYO1D |
| hsa-miR-532-3p | RFFL |
| hsa-miR-532-3p | AC004223.3 |
| hsa-miR-532-3p | ACACA |
| hsa-miR-532-3p | SRCIN1 |
| hsa-miR-532-3p | PCGF2 |
| hsa-miR-532-3p | PIP4K2B |
| hsa-miR-532-3p | STAC2 |
| hsa-miR-532-3p | KLHL11 |
| hsa-miR-532-3p | RAB5C |
| hsa-miR-532-3p | CAVIN1 |
| hsa-miR-532-3p | PSMC3IP |
| hsa-miR-532-3p | RETREG3 |
| hsa-miR-532-3p | EZH1 |
| hsa-miR-532-3p | VAT1 |
| hsa-miR-532-3p | BRCA1 |
| hsa-miR-532-3p | DUSP3 |
| hsa-miR-532-3p | MPP2 |
| hsa-miR-532-3p | TMEM101 |
| hsa-miR-532-3p | ATXN7L3 |
| hsa-miR-532-3p | UBTF |
| hsa-miR-532-3p | CCDC43 |
| hsa-miR-532-3p | DCAKD |
| hsa-miR-532-3p | PLCD3 |
| hsa-miR-532-3p | MAP3K14 |
| hsa-miR-532-3p | MRPL10 |
| hsa-miR-532-3p | CBX1 |
| hsa-miR-532-3p | HOXB4 |
| hsa-miR-532-3p | HOXB9 |
| hsa-miR-532-3p | PPP1R9B |
| hsa-miR-532-3p | COL1A1 |
| hsa-miR-532-3p | MRPL27 |
| hsa-miR-532-3p | LRRC59 |
| hsa-miR-532-3p | MBTD1 |
| hsa-miR-532-3p | MMD |
| hsa-miR-532-3p | TRIM25 |
| hsa-miR-532-3p | VEZF1 |
| hsa-miR-532-3p | SRSF1 |
| hsa-miR-532-3p | SUPT4H1 |
| hsa-miR-532-3p | MTMR4 |
| hsa-miR-532-3p | APPBP2 |
| hsa-miR-532-3p | INTS2 |
| hsa-miR-532-3p | CYB561 |
| hsa-miR-532-3p | LIMD2 |
| hsa-miR-532-3p | AC046185.1 |
| hsa-miR-532-3p | STRADA |
| hsa-miR-532-3p | CCDC47 |
| hsa-miR-532-3p | SMARCD2 |
| hsa-miR-532-3p | TEX2 |
| hsa-miR-532-3p | SMURF2 |
| hsa-miR-532-3p | GNA13 |
| hsa-miR-532-3p | WIPI1 |
| hsa-miR-532-3p | NAT9 |
| hsa-miR-532-3p | FDXR |
| hsa-miR-532-3p | GGA3 |
| hsa-miR-532-3p | GRB2 |
| hsa-miR-532-3p | WBP2 |
| hsa-miR-532-3p | TRIM47 |
| hsa-miR-532-3p | TRIM65 |
| hsa-miR-532-3p | ACOX1 |
| hsa-miR-532-3p | RNF157 |
| hsa-miR-532-3p | UBE2O |
| hsa-miR-532-3p | CYGB |
| hsa-miR-532-3p | ST6GALNAC2 |
| hsa-miR-532-3p | AC015802.6 |
| hsa-miR-532-3p | SRSF2 |
| hsa-miR-532-3p | CYTH1 |
| hsa-miR-532-3p | USP36 |
| hsa-miR-532-3p | TIMP2 |
| hsa-miR-532-3p | CANT1 |
| hsa-miR-532-3p | CBX8 |
| hsa-miR-532-3p | TBC1D16 |
| hsa-miR-532-3p | SGSH |
| hsa-miR-532-3p | NPTX1 |
| hsa-miR-532-3p | FAAP100 |
| hsa-miR-532-3p | NPLOC4 |
| hsa-miR-532-3p | MAFG |
| hsa-miR-532-3p | PYCR1 |
| hsa-miR-532-3p | RFNG |
| hsa-miR-532-3p | OGFOD3 |
| hsa-miR-532-3p | C17orf62 |
| hsa-miR-532-3p | FAM57A |
| hsa-miR-532-3p | MRM3 |
| hsa-miR-532-3p | PAFAH1B1 |
| hsa-miR-532-3p | RAP1GAP2 |
| hsa-miR-532-3p | PSMB6 |
| hsa-miR-532-3p | KIF1C |
| hsa-miR-532-3p | RABEP1 |
| hsa-miR-532-3p | EIF5A |
| hsa-miR-532-3p | NLGN2 |
| hsa-miR-532-3p | SENP3 |
| hsa-miR-532-3p | MPDU1 |
| hsa-miR-532-3p | KDM6B |
| hsa-miR-532-3p | CHD3 |
| hsa-miR-532-3p | PFAS |
| hsa-miR-532-3p | USP43 |
| hsa-miR-532-3p | MAP2K4 |
| hsa-miR-532-3p | COX10 |
| hsa-miR-532-3p | MPRIP |
| hsa-miR-532-3p | NT5M |
| hsa-miR-532-3p | RAI1 |
| hsa-miR-532-3p | GID4 |
| hsa-miR-532-3p | ALKBH5 |
| hsa-miR-532-3p | SMCR8 |
| hsa-miR-532-3p | EPN2 |
| hsa-miR-532-3p | ALDH3A2 |
| hsa-miR-532-3p | SPECC1 |
| hsa-miR-532-3p | MAP2K3 |
| hsa-miR-532-3p | WSB1 |
| hsa-miR-532-3p | NLK |
| hsa-miR-532-3p | RPL23A |
| hsa-miR-532-3p | CPD |
| hsa-miR-532-3p | GOSR1 |
| hsa-miR-532-3p | RNF135 |
| hsa-miR-532-3p | NF1 |
| hsa-miR-532-3p | RAB11FIP4 |
| hsa-miR-532-3p | ZNF207 |
| hsa-miR-532-3p | PSMD11 |
| hsa-miR-532-3p | AP2B1 |
| hsa-miR-532-3p | TAF15 |
| hsa-miR-532-3p | GGNBP2 |
| hsa-miR-532-3p | TADA2A |
| hsa-miR-532-3p | SOCS7 |
| hsa-miR-532-3p | MLLT6 |
| hsa-miR-532-3p | PSMB3 |
| hsa-miR-532-3p | LASP1 |
| hsa-miR-532-3p | CDK12 |
| hsa-miR-532-3p | GRB7 |
| hsa-miR-532-3p | PSMD3 |
| hsa-miR-532-3p | CSF3 |
| hsa-miR-532-3p | THRA |
| hsa-miR-532-3p | MSL1 |
| hsa-miR-532-3p | RAPGEFL1 |
| hsa-miR-532-3p | WIPF2 |
| hsa-miR-532-3p | IGFBP4 |
| hsa-miR-532-3p | FKBP10 |
| hsa-miR-532-3p | NKIRAS2 |
| hsa-miR-532-3p | RUNDC1 |
| hsa-miR-532-3p | RND2 |
| hsa-miR-532-3p | ARL4D |
| hsa-miR-532-3p | DHX8 |
| hsa-miR-532-3p | TMUB2 |
| hsa-miR-532-3p | GRN |
| hsa-miR-532-3p | NMT1 |
| hsa-miR-532-3p | ACBD4 |
| hsa-miR-532-3p | HEXIM1 |
| hsa-miR-532-3p | MAPT |
| hsa-miR-532-3p | NSF |
| hsa-miR-532-3p | GOSR2 |
| hsa-miR-532-3p | ITGB3 |
| hsa-miR-532-3p | TBKBP1 |
| hsa-miR-532-3p | PNPO |
| hsa-miR-532-3p | NFE2L1 |
| hsa-miR-532-3p | SNX11 |
| hsa-miR-532-3p | UBE2Z |
| hsa-miR-532-3p | IGF2BP1 |
| hsa-miR-532-3p | KAT7 |
| hsa-miR-532-3p | XYLT2 |
| hsa-miR-532-3p | RSAD1 |
| hsa-miR-532-3p | CACNA1G |
| hsa-miR-532-3p | LUC7L3 |
| hsa-miR-532-3p | NME1-NME2 |
| hsa-miR-532-3p | NME1 |
| hsa-miR-532-3p | DYNLL2 |
| hsa-miR-532-3p | PPM1E |
| hsa-miR-532-3p | PRR11 |
| hsa-miR-532-3p | YPEL2 |
| hsa-miR-532-3p | VMP1 |
| hsa-miR-532-3p | TBX2 |
| hsa-miR-532-3p | METTL2A |
| hsa-miR-532-3p | TLK2 |
| hsa-miR-532-3p | TANC2 |
| hsa-miR-532-3p | DCAF7 |
| hsa-miR-532-3p | TACO1 |
| hsa-miR-532-3p | MAP3K3 |
| hsa-miR-532-3p | DDX42 |
| hsa-miR-532-3p | PRKCA |
| hsa-miR-532-3p | PRKAR1A |
| hsa-miR-532-3p | SOX9 |
| hsa-miR-532-3p | MRPL58 |
| hsa-miR-532-3p | KCTD2 |
| hsa-miR-532-3p | TMEM94 |
| hsa-miR-532-3p | LLGL2 |
| hsa-miR-532-3p | SAP30BP |
| hsa-miR-532-3p | ITGB4 |
| hsa-miR-532-3p | 9-Sep |
| hsa-miR-532-3p | SYNGR2 |
| hsa-miR-532-3p | BIRC5 |
| hsa-miR-532-3p | CBX2 |
| hsa-miR-532-3p | GAA |
| hsa-miR-532-3p | RNF213 |
| hsa-miR-532-3p | MRPL12 |
| hsa-miR-532-3p | LRRC45 |
| hsa-miR-532-3p | SLC16A3 |
| hsa-miR-532-3p | TEX19 |
| hsa-miR-532-3p | FOXK2 |
| hsa-miR-532-3p | FN3KRP |
| hsa-miR-532-3p | METRNL |
| hsa-miR-532-3p | PPP4R1 |
| hsa-miR-532-3p | SPIRE1 |
| hsa-miR-532-3p | ROCK1 |
| hsa-miR-532-3p | CDH2 |
| hsa-miR-532-3p | RPRD1A |
| hsa-miR-532-3p | EPG5 |
| hsa-miR-532-3p | SMAD7 |
| hsa-miR-532-3p | C18orf32 |
| hsa-miR-532-3p | RPL17-C18orf32 |
| hsa-miR-532-3p | MYO5B |
| hsa-miR-532-3p | MBD1 |
| hsa-miR-532-3p | CCDC68 |
| hsa-miR-532-3p | FECH |
| hsa-miR-532-3p | NARS |
| hsa-miR-532-3p | ATP8B1 |
| hsa-miR-532-3p | RNF152 |
| hsa-miR-532-3p | BCL2 |
| hsa-miR-532-3p | TMX3 |
| hsa-miR-532-3p | ZNF516 |
| hsa-miR-532-3p | MBP |
| hsa-miR-532-3p | USP14 |
| hsa-miR-532-3p | RAB12 |
| hsa-miR-532-3p | ANKRD12 |
| hsa-miR-532-3p | RALBP1 |
| hsa-miR-532-3p | SEH1L |
| hsa-miR-532-3p | RNMT |
| hsa-miR-532-3p | MIB1 |
| hsa-miR-532-3p | RIOK3 |
| hsa-miR-532-3p | RNF125 |
| hsa-miR-532-3p | ZNF397 |
| hsa-miR-532-3p | KIAA1328 |
| hsa-miR-532-3p | RNF165 |
| hsa-miR-532-3p | CTIF |
| hsa-miR-532-3p | MAPK4 |
| hsa-miR-532-3p | ONECUT2 |
| hsa-miR-532-3p | NEDD4L |
| hsa-miR-532-3p | ZCCHC2 |
| hsa-miR-532-3p | CNDP2 |
| hsa-miR-532-3p | C19orf25 |
| hsa-miR-532-3p | MBD3 |
| hsa-miR-532-3p | UQCR11 |
| hsa-miR-532-3p | KLF16 |
| hsa-miR-532-3p | BTBD2 |
| hsa-miR-532-3p | MOB3A |
| hsa-miR-532-3p | TIMM13 |
| hsa-miR-532-3p | GNG7 |
| hsa-miR-532-3p | ZNF77 |
| hsa-miR-532-3p | AES |
| hsa-miR-532-3p | ZBTB7A |
| hsa-miR-532-3p | LRG1 |
| hsa-miR-532-3p | DPP9 |
| hsa-miR-532-3p | RANBP3 |
| hsa-miR-532-3p | MLLT1 |
| hsa-miR-532-3p | INSR |
| hsa-miR-532-3p | ELAVL1 |
| hsa-miR-532-3p | AC011511.1 |
| hsa-miR-532-3p | FDX2 |
| hsa-miR-532-3p | RAVER1 |
| hsa-miR-532-3p | AC011511.4 |
| hsa-miR-532-3p | TYK2 |
| hsa-miR-532-3p | KEAP1 |
| hsa-miR-532-3p | AP1M2 |
| hsa-miR-532-3p | SPC24 |
| hsa-miR-532-3p | TMEM205 |
| hsa-miR-532-3p | ZNF625 |
| hsa-miR-532-3p | TNPO2 |
| hsa-miR-532-3p | PRKACA |
| hsa-miR-532-3p | DNAJB1 |
| hsa-miR-532-3p | ADGRE2 |
| hsa-miR-532-3p | BRD4 |
| hsa-miR-532-3p | WIZ |
| hsa-miR-532-3p | SLC35E1 |
| hsa-miR-532-3p | IQCN |
| hsa-miR-532-3p | GDF1 |
| hsa-miR-532-3p | CERS1 |
| hsa-miR-532-3p | NR2C2AP |
| hsa-miR-532-3p | SUGP1 |
| hsa-miR-532-3p | GMIP |
| hsa-miR-532-3p | ZNF14 |
| hsa-miR-532-3p | C19orf12 |
| hsa-miR-532-3p | ANKRD27 |
| hsa-miR-532-3p | CEBPA |
| hsa-miR-532-3p | THAP8 |
| hsa-miR-532-3p | ZNF566 |
| hsa-miR-532-3p | ZNF829 |
| hsa-miR-532-3p | ZNF569 |
| hsa-miR-532-3p | ZFP30 |
| hsa-miR-532-3p | FBXO17 |
| hsa-miR-532-3p | FBXO27 |
| hsa-miR-532-3p | AKT2 |
| hsa-miR-532-3p | SERTAD3 |
| hsa-miR-532-3p | C19orf54 |
| hsa-miR-532-3p | DEDD2 |
| hsa-miR-532-3p | GSK3A |
| hsa-miR-532-3p | CNFN |
| hsa-miR-532-3p | ETHE1 |
| hsa-miR-532-3p | IRGQ |
| hsa-miR-532-3p | ZNF428 |
| hsa-miR-532-3p | PLAUR |
| hsa-miR-532-3p | KCNN4 |
| hsa-miR-532-3p | ZNF229 |
| hsa-miR-532-3p | PPP1R13L |
| hsa-miR-532-3p | ERCC1 |
| hsa-miR-532-3p | OPA3 |
| hsa-miR-532-3p | SIX5 |
| hsa-miR-532-3p | SYMPK |
| hsa-miR-532-3p | MYPOP |
| hsa-miR-532-3p | NOVA2 |
| hsa-miR-532-3p | DACT3 |
| hsa-miR-532-3p | STRN4 |
| hsa-miR-532-3p | BBC3 |
| hsa-miR-532-3p | SULT2A1 |
| hsa-miR-532-3p | CARD8 |
| hsa-miR-532-3p | RASIP1 |
| hsa-miR-532-3p | GYS1 |
| hsa-miR-532-3p | AKT1S1 |
| hsa-miR-532-3p | ZNF614 |
| hsa-miR-532-3p | ZNF611 |
| hsa-miR-532-3p | ZNF468 |
| hsa-miR-532-3p | ZNF160 |
| hsa-miR-532-3p | MBOAT7 |
| hsa-miR-532-3p | PPP1R12C |
| hsa-miR-532-3p | IL11 |
| hsa-miR-532-3p | FIZ1 |
| hsa-miR-532-3p | ZIM3 |
| hsa-miR-532-3p | ZNF772 |
| hsa-miR-532-3p | ZNF552 |
| hsa-miR-532-3p | CDC34 |
| hsa-miR-532-3p | PALM |
| hsa-miR-532-3p | MISP |
| hsa-miR-532-3p | CFD |
| hsa-miR-532-3p | STK11 |
| hsa-miR-532-3p | MIDN |
| hsa-miR-532-3p | CIRBP |
| hsa-miR-532-3p | DAZAP1 |
| hsa-miR-532-3p | SCAMP4 |
| hsa-miR-532-3p | CSNK1G2 |
| hsa-miR-532-3p | DOT1L |
| hsa-miR-532-3p | GADD45B |
| hsa-miR-532-3p | ZNF554 |
| hsa-miR-532-3p | NCLN |
| hsa-miR-532-3p | NFIC |
| hsa-miR-532-3p | KDM4B |
| hsa-miR-532-3p | VMAC |
| hsa-miR-532-3p | CAPS |
| hsa-miR-532-3p | ZNF317 |
| hsa-miR-532-3p | PIN1 |
| hsa-miR-532-3p | MRPL4 |
| hsa-miR-532-3p | ICAM1 |
| hsa-miR-532-3p | PDE4A |
| hsa-miR-532-3p | SLC44A2 |
| hsa-miR-532-3p | ILF3 |
| hsa-miR-532-3p | CARM1 |
| hsa-miR-532-3p | LDLR |
| hsa-miR-532-3p | ZNF440 |
| hsa-miR-532-3p | ZNF700 |
| hsa-miR-532-3p | AC008770.2 |
| hsa-miR-532-3p | ZNF791 |
| hsa-miR-532-3p | RNASEH2A |
| hsa-miR-532-3p | THSD8 |
| hsa-miR-532-3p | RAD23A |
| hsa-miR-532-3p | IER2 |
| hsa-miR-532-3p | MRI1 |
| hsa-miR-532-3p | ZSWIM4 |
| hsa-miR-532-3p | IL27RA |
| hsa-miR-532-3p | ZNF333 |
| hsa-miR-532-3p | SYDE1 |
| hsa-miR-532-3p | TPM4 |
| hsa-miR-532-3p | FAM32A |
| hsa-miR-532-3p | SIN3B |
| hsa-miR-532-3p | COLGALT1 |
| hsa-miR-532-3p | ARRDC2 |
| hsa-miR-532-3p | MAST3 |
| hsa-miR-532-3p | PIK3R2 |
| hsa-miR-532-3p | AC007192.1 |
| hsa-miR-532-3p | PGPEP1 |
| hsa-miR-532-3p | SSBP4 |
| hsa-miR-532-3p | UPF1 |
| hsa-miR-532-3p | SLC25A42 |
| hsa-miR-532-3p | RFXANK |
| hsa-miR-532-3p | MAU2 |
| hsa-miR-532-3p | GATAD2A |
| hsa-miR-532-3p | ZNF85 |
| hsa-miR-532-3p | ZNF431 |
| hsa-miR-532-3p | ZNF492 |
| hsa-miR-532-3p | ZNF507 |
| hsa-miR-532-3p | FAAP24 |
| hsa-miR-532-3p | WTIP |
| hsa-miR-532-3p | ZNF302 |
| hsa-miR-532-3p | SCN1B |
| hsa-miR-532-3p | PSENEN |
| hsa-miR-532-3p | ARHGAP33 |
| hsa-miR-532-3p | CAPNS1 |
| hsa-miR-532-3p | ZNF146 |
| hsa-miR-532-3p | ZNF793 |
| hsa-miR-532-3p | SPINT2 |
| hsa-miR-532-3p | KCNK6 |
| hsa-miR-532-3p | PAK4 |
| hsa-miR-532-3p | MED29 |
| hsa-miR-532-3p | PLEKHG2 |
| hsa-miR-532-3p | SPTBN4 |
| hsa-miR-532-3p | RAB4B-EGLN2 |
| hsa-miR-532-3p | EGLN2 |
| hsa-miR-532-3p | CD79A |
| hsa-miR-532-3p | ARHGEF1 |
| hsa-miR-532-3p | ZNF526 |
| hsa-miR-532-3p | MEGF8 |
| hsa-miR-532-3p | ZNF576 |
| hsa-miR-532-3p | ZNF226 |
| hsa-miR-532-3p | NECTIN2 |
| hsa-miR-532-3p | CLPTM1 |
| hsa-miR-532-3p | VASP |
| hsa-miR-532-3p | CCDC61 |
| hsa-miR-532-3p | HIF3A |
| hsa-miR-532-3p | CALM3 |
| hsa-miR-532-3p | ARHGAP35 |
| hsa-miR-532-3p | SAE1 |
| hsa-miR-532-3p | DHX34 |
| hsa-miR-532-3p | EHD2 |
| hsa-miR-532-3p | ZNF114 |
| hsa-miR-532-3p | CYTH2 |
| hsa-miR-532-3p | BAX |
| hsa-miR-532-3p | SNRNP70 |
| hsa-miR-532-3p | PPFIA3 |
| hsa-miR-532-3p | TRPM4 |
| hsa-miR-532-3p | RPL13A |
| hsa-miR-532-3p | PRR12 |
| hsa-miR-532-3p | PTOV1 |
| hsa-miR-532-3p | ATF5 |
| hsa-miR-532-3p | ZNF473 |
| hsa-miR-532-3p | PPP2R1A |
| hsa-miR-532-3p | ZNF480 |
| hsa-miR-532-3p | ZNF331 |
| hsa-miR-532-3p | MYADM |
| hsa-miR-532-3p | TSEN34 |
| hsa-miR-532-3p | LILRB1 |
| hsa-miR-532-3p | EPS8L1 |
| hsa-miR-532-3p | KMT5C |
| hsa-miR-532-3p | RPL28 |
| hsa-miR-532-3p | NAT14 |
| hsa-miR-532-3p | EPN1 |
| hsa-miR-532-3p | ZNF71 |
| hsa-miR-532-3p | ZNF460 |
| hsa-miR-532-3p | ZNF543 |
| hsa-miR-532-3p | ZNF304 |
| hsa-miR-532-3p | ZNF530 |
| hsa-miR-532-3p | ZNF134 |
| hsa-miR-532-3p | ZNF551 |
| hsa-miR-532-3p | ZNF776 |
| hsa-miR-532-3p | ZNF135 |
| hsa-miR-532-3p | AC020915.1 |
| hsa-miR-532-3p | ZNF8 |
| hsa-miR-532-3p | AC020915.5 |
| hsa-miR-532-3p | PXDN |
| hsa-miR-532-3p | RNASEH1 |
| hsa-miR-532-3p | ADAM17 |
| hsa-miR-532-3p | PDIA6 |
| hsa-miR-532-3p | ROCK2 |
| hsa-miR-532-3p | FAM49A |
| hsa-miR-532-3p | SDC1 |
| hsa-miR-532-3p | ATAD2B |
| hsa-miR-532-3p | ITSN2 |
| hsa-miR-532-3p | DNAJC27 |
| hsa-miR-532-3p | DNMT3A |
| hsa-miR-532-3p | KIF3C |
| hsa-miR-532-3p | SLC30A3 |
| hsa-miR-532-3p | GTF3C2 |
| hsa-miR-532-3p | FEZ2 |
| hsa-miR-532-3p | CYP1B1 |
| hsa-miR-532-3p | THADA |
| hsa-miR-532-3p | PREPL |
| hsa-miR-532-3p | SIX2 |
| hsa-miR-532-3p | MCFD2 |
| hsa-miR-532-3p | PPP4R3B |
| hsa-miR-532-3p | BCL11A |
| hsa-miR-532-3p | FAM161A |
| hsa-miR-532-3p | CCT4 |
| hsa-miR-532-3p | SERTAD2 |
| hsa-miR-532-3p | WDR92 |
| hsa-miR-532-3p | GFPT1 |
| hsa-miR-532-3p | AAK1 |
| hsa-miR-532-3p | TGFA |
| hsa-miR-532-3p | TEX261 |
| hsa-miR-532-3p | SFXN5 |
| hsa-miR-532-3p | FBXO41 |
| hsa-miR-532-3p | MOB1A |
| hsa-miR-532-3p | MOGS |
| hsa-miR-532-3p | CCDC142 |
| hsa-miR-532-3p | EVA1A |
| hsa-miR-532-3p | TGOLN2 |
| hsa-miR-532-3p | C2orf68 |
| hsa-miR-532-3p | KRCC1 |
| hsa-miR-532-3p | EIF2AK3 |
| hsa-miR-532-3p | ZNF514 |
| hsa-miR-532-3p | STARD7 |
| hsa-miR-532-3p | TMEM127 |
| hsa-miR-532-3p | KANSL3 |
| hsa-miR-532-3p | LMAN2L |
| hsa-miR-532-3p | SEMA4C |
| hsa-miR-532-3p | ACTR1B |
| hsa-miR-532-3p | COA5 |
| hsa-miR-532-3p | MGAT4A |
| hsa-miR-532-3p | LONRF2 |
| hsa-miR-532-3p | MALL |
| hsa-miR-532-3p | IL1A |
| hsa-miR-532-3p | PAX8 |
| hsa-miR-532-3p | CLASP1 |
| hsa-miR-532-3p | NIFK |
| hsa-miR-532-3p | WDR33 |
| hsa-miR-532-3p | POLR2D |
| hsa-miR-532-3p | HS6ST1 |
| hsa-miR-532-3p | SMPD4 |
| hsa-miR-532-3p | FAM168B |
| hsa-miR-532-3p | RPRM |
| hsa-miR-532-3p | STK39 |
| hsa-miR-532-3p | SLC25A12 |
| hsa-miR-532-3p | WIPF1 |
| hsa-miR-532-3p | ATP5MC3 |
| hsa-miR-532-3p | LNPK |
| hsa-miR-532-3p | STAT1 |
| hsa-miR-532-3p | GTF3C3 |
| hsa-miR-532-3p | TYW5 |
| hsa-miR-532-3p | FAM126B |
| hsa-miR-532-3p | TRAK2 |
| hsa-miR-532-3p | SUMO1 |
| hsa-miR-532-3p | RAPH1 |
| hsa-miR-532-3p | INO80D |
| hsa-miR-532-3p | GPR1 |
| hsa-miR-532-3p | FZD5 |
| hsa-miR-532-3p | IKZF2 |
| hsa-miR-532-3p | FN1 |
| hsa-miR-532-3p | TNS1 |
| hsa-miR-532-3p | AAMP |
| hsa-miR-532-3p | IHH |
| hsa-miR-532-3p | CNPPD1 |
| hsa-miR-532-3p | ATG9A |
| hsa-miR-532-3p | AC068946.2 |
| hsa-miR-532-3p | PTPRN |
| hsa-miR-532-3p | DNPEP |
| hsa-miR-532-3p | AP1S3 |
| hsa-miR-532-3p | WDFY1 |
| hsa-miR-532-3p | SERPINE2 |
| hsa-miR-532-3p | PID1 |
| hsa-miR-532-3p | USP40 |
| hsa-miR-532-3p | COL6A3 |
| hsa-miR-532-3p | KIF1A |
| hsa-miR-532-3p | HDLBP |
| hsa-miR-532-3p | SOX11 |
| hsa-miR-532-3p | RRM2 |
| hsa-miR-532-3p | GREB1 |
| hsa-miR-532-3p | LPIN1 |
| hsa-miR-532-3p | TRIB2 |
| hsa-miR-532-3p | MYCN |
| hsa-miR-532-3p | UBXN2A |
| hsa-miR-532-3p | CENPO |
| hsa-miR-532-3p | SELENOI |
| hsa-miR-532-3p | TMEM214 |
| hsa-miR-532-3p | KHK |
| hsa-miR-532-3p | CAD |
| hsa-miR-532-3p | GCKR |
| hsa-miR-532-3p | FOSL2 |
| hsa-miR-532-3p | LBH |
| hsa-miR-532-3p | YIPF4 |
| hsa-miR-532-3p | GPATCH11 |
| hsa-miR-532-3p | ABCG8 |
| hsa-miR-532-3p | PRKCE |
| hsa-miR-532-3p | EPAS1 |
| hsa-miR-532-3p | TTC7A |
| hsa-miR-532-3p | ERLEC1 |
| hsa-miR-532-3p | SPTBN1 |
| hsa-miR-532-3p | SLC1A4 |
| hsa-miR-532-3p | ACTR2 |
| hsa-miR-532-3p | ANTXR1 |
| hsa-miR-532-3p | MXD1 |
| hsa-miR-532-3p | PCYOX1 |
| hsa-miR-532-3p | SPR |
| hsa-miR-532-3p | ALMS1 |
| hsa-miR-532-3p | TET3 |
| hsa-miR-532-3p | MTHFD2 |
| hsa-miR-532-3p | HTRA2 |
| hsa-miR-532-3p | DOK1 |
| hsa-miR-532-3p | HK2 |
| hsa-miR-532-3p | MRPL19 |
| hsa-miR-532-3p | ELMOD3 |
| hsa-miR-532-3p | RMND5A |
| hsa-miR-532-3p | RPIA |
| hsa-miR-532-3p | CNNM4 |
| hsa-miR-532-3p | CNNM3 |
| hsa-miR-532-3p | MAP4K4 |
| hsa-miR-532-3p | FLJ20373 |
| hsa-miR-532-3p | IL1R1 |
| hsa-miR-532-3p | IL1RL1 |
| hsa-miR-532-3p | SLC9A2 |
| hsa-miR-532-3p | GCC2 |
| hsa-miR-532-3p | SH3RF3 |
| hsa-miR-532-3p | SOWAHC |
| hsa-miR-532-3p | BCL2L11 |
| hsa-miR-532-3p | TMEM87B |
| hsa-miR-532-3p | TTL |
| hsa-miR-532-3p | SLC20A1 |
| hsa-miR-532-3p | IL1RN |
| hsa-miR-532-3p | PSD4 |
| hsa-miR-532-3p | ACTR3 |
| hsa-miR-532-3p | STEAP3 |
| hsa-miR-532-3p | INHBB |
| hsa-miR-532-3p | TSN |
| hsa-miR-532-3p | SFT2D3 |
| hsa-miR-532-3p | PLEKHB2 |
| hsa-miR-532-3p | MGAT5 |
| hsa-miR-532-3p | UBXN4 |
| hsa-miR-532-3p | SPOPL |
| hsa-miR-532-3p | ACVR2A |
| hsa-miR-532-3p | GPD2 |
| hsa-miR-532-3p | PKP4 |
| hsa-miR-532-3p | CERS6 |
| hsa-miR-532-3p | SP5 |
| hsa-miR-532-3p | DCAF17 |
| hsa-miR-532-3p | CYBRD1 |
| hsa-miR-532-3p | ITGA6 |
| hsa-miR-532-3p | MAP3K20 |
| hsa-miR-532-3p | HNRNPA3 |
| hsa-miR-532-3p | AGPS |
| hsa-miR-532-3p | UBE2E3 |
| hsa-miR-532-3p | ITGAV |
| hsa-miR-532-3p | NAB1 |
| hsa-miR-532-3p | MYO1B |
| hsa-miR-532-3p | NABP1 |
| hsa-miR-532-3p | STRADB |
| hsa-miR-532-3p | FZD7 |
| hsa-miR-532-3p | NOP58 |
| hsa-miR-532-3p | BMPR2 |
| hsa-miR-532-3p | NBEAL1 |
| hsa-miR-532-3p | ABI2 |
| hsa-miR-532-3p | CREB1 |
| hsa-miR-532-3p | PIKFYVE |
| hsa-miR-532-3p | RPE |
| hsa-miR-532-3p | XRCC5 |
| hsa-miR-532-3p | SLC11A1 |
| hsa-miR-532-3p | CTDSP1 |
| hsa-miR-532-3p | CNOT9 |
| hsa-miR-532-3p | DNAJB2 |
| hsa-miR-532-3p | KCNE4 |
| hsa-miR-532-3p | C2orf72 |
| hsa-miR-532-3p | ALPP |
| hsa-miR-532-3p | EIF4E2 |
| hsa-miR-532-3p | GIGYF2 |
| hsa-miR-532-3p | ATG16L1 |
| hsa-miR-532-3p | SH3BP4 |
| hsa-miR-532-3p | ACKR3 |
| hsa-miR-532-3p | MLPH |
| hsa-miR-532-3p | LRRFIP1 |
| hsa-miR-532-3p | KLHL30 |
| hsa-miR-532-3p | ASB1 |
| hsa-miR-532-3p | RNPEPL1 |
| hsa-miR-532-3p | 2-Sep |
| hsa-miR-532-3p | ING5 |
| hsa-miR-532-3p | NEU4 |
| hsa-miR-532-3p | TBC1D20 |
| hsa-miR-532-3p | CSNK2A1 |
| hsa-miR-532-3p | LZTS3 |
| hsa-miR-532-3p | C20orf194 |
| hsa-miR-532-3p | C20orf27 |
| hsa-miR-532-3p | RRBP1 |
| hsa-miR-532-3p | RALGAPA2 |
| hsa-miR-532-3p | NKX2-4 |
| hsa-miR-532-3p | THBD |
| hsa-miR-532-3p | CD93 |
| hsa-miR-532-3p | ABHD12 |
| hsa-miR-532-3p | NINL |
| hsa-miR-532-3p | PLAGL2 |
| hsa-miR-532-3p | E2F1 |
| hsa-miR-532-3p | PXMP4 |
| hsa-miR-532-3p | TRPC4AP |
| hsa-miR-532-3p | SOGA1 |
| hsa-miR-532-3p | RBL1 |
| hsa-miR-532-3p | BLCAP |
| hsa-miR-532-3p | TGM2 |
| hsa-miR-532-3p | ZHX3 |
| hsa-miR-532-3p | FITM2 |
| hsa-miR-532-3p | TOMM34 |
| hsa-miR-532-3p | ZNF335 |
| hsa-miR-532-3p | SLC35C2 |
| hsa-miR-532-3p | TP53RK |
| hsa-miR-532-3p | ZMYND8 |
| hsa-miR-532-3p | PREX1 |
| hsa-miR-532-3p | ZNFX1 |
| hsa-miR-532-3p | B4GALT5 |
| hsa-miR-532-3p | SPATA2 |
| hsa-miR-532-3p | ATP9A |
| hsa-miR-532-3p | ZNF217 |
| hsa-miR-532-3p | PMEPA1 |
| hsa-miR-532-3p | PPP1R3D |
| hsa-miR-532-3p | CABLES2 |
| hsa-miR-532-3p | TCFL5 |
| hsa-miR-532-3p | DIDO1 |
| hsa-miR-532-3p | GMEB2 |
| hsa-miR-532-3p | STMN3 |
| hsa-miR-532-3p | ARFRP1 |
| hsa-miR-532-3p | ZNF512B |
| hsa-miR-532-3p | ZCCHC3 |
| hsa-miR-532-3p | SOX12 |
| hsa-miR-532-3p | TRIB3 |
| hsa-miR-532-3p | PSMF1 |
| hsa-miR-532-3p | SIRPA |
| hsa-miR-532-3p | STK35 |
| hsa-miR-532-3p | NOP56 |
| hsa-miR-532-3p | ITPA |
| hsa-miR-532-3p | ATRN |
| hsa-miR-532-3p | CDC25B |
| hsa-miR-532-3p | AP5S1 |
| hsa-miR-532-3p | PLCB1 |
| hsa-miR-532-3p | SPTLC3 |
| hsa-miR-532-3p | PCSK2 |
| hsa-miR-532-3p | GZF1 |
| hsa-miR-532-3p | PYGB |
| hsa-miR-532-3p | GINS1 |
| hsa-miR-532-3p | POFUT1 |
| hsa-miR-532-3p | ASXL1 |
| hsa-miR-532-3p | CHMP4B |
| hsa-miR-532-3p | ITCH |
| hsa-miR-532-3p | TP53INP2 |
| hsa-miR-532-3p | EPB41L1 |
| hsa-miR-532-3p | DLGAP4 |
| hsa-miR-532-3p | MYL9 |
| hsa-miR-532-3p | TGIF2 |
| hsa-miR-532-3p | MANBAL |
| hsa-miR-532-3p | RPRD1B |
| hsa-miR-532-3p | RALGAPB |
| hsa-miR-532-3p | PPP1R16B |
| hsa-miR-532-3p | LPIN3 |
| hsa-miR-532-3p | SRSF6 |
| hsa-miR-532-3p | L3MBTL1 |
| hsa-miR-532-3p | HNF4A |
| hsa-miR-532-3p | TTPAL |
| hsa-miR-532-3p | KCNK15 |
| hsa-miR-532-3p | YWHAB |
| hsa-miR-532-3p | STK4 |
| hsa-miR-532-3p | SYS1 |
| hsa-miR-532-3p | SLC2A10 |
| hsa-miR-532-3p | NCOA3 |
| hsa-miR-532-3p | ARFGEF2 |
| hsa-miR-532-3p | RNF114 |
| hsa-miR-532-3p | SNAI1 |
| hsa-miR-532-3p | RTF2 |
| hsa-miR-532-3p | TFAP2C |
| hsa-miR-532-3p | STX16 |
| hsa-miR-532-3p | GNAS |
| hsa-miR-532-3p | NELFCD |
| hsa-miR-532-3p | LSM14B |
| hsa-miR-532-3p | MTG2 |
| hsa-miR-532-3p | OSBPL2 |
| hsa-miR-532-3p | NTSR1 |
| hsa-miR-532-3p | SLC17A9 |
| hsa-miR-532-3p | ARFGAP1 |
| hsa-miR-532-3p | TPD52L2 |
| hsa-miR-532-3p | DNAJC5 |
| hsa-miR-532-3p | C20orf204 |
| hsa-miR-532-3p | PCMTD2 |
| hsa-miR-532-3p | APP |
| hsa-miR-532-3p | ADAMTS5 |
| hsa-miR-532-3p | LTN1 |
| hsa-miR-532-3p | MIS18A |
| hsa-miR-532-3p | URB1 |
| hsa-miR-532-3p | TMEM50B |
| hsa-miR-532-3p | GART |
| hsa-miR-532-3p | RCAN1 |
| hsa-miR-532-3p | HLCS |
| hsa-miR-532-3p | ERG |
| hsa-miR-532-3p | BRWD1 |
| hsa-miR-532-3p | PRDM15 |
| hsa-miR-532-3p | C2CD2 |
| hsa-miR-532-3p | ZBTB21 |
| hsa-miR-532-3p | SIK1 |
| hsa-miR-532-3p | SIK1B |
| hsa-miR-532-3p | ICOSLG |
| hsa-miR-532-3p | FP565260.3 |
| hsa-miR-532-3p | UBE2G2 |
| hsa-miR-532-3p | PTTG1IP |
| hsa-miR-532-3p | POFUT2 |
| hsa-miR-532-3p | SLC19A1 |
| hsa-miR-532-3p | LSS |
| hsa-miR-532-3p | C21orf58 |
| hsa-miR-532-3p | HUNK |
| hsa-miR-532-3p | IFNAR2 |
| hsa-miR-532-3p | IFNAR1 |
| hsa-miR-532-3p | ITSN1 |
| hsa-miR-532-3p | SIM2 |
| hsa-miR-532-3p | DYRK1A |
| hsa-miR-532-3p | ETS2 |
| hsa-miR-532-3p | RRP1B |
| hsa-miR-532-3p | PDXK |
| hsa-miR-532-3p | AGPAT3 |
| hsa-miR-532-3p | TRAPPC10 |
| hsa-miR-532-3p | FP565260.7 |
| hsa-miR-532-3p | C21orf33 |
| hsa-miR-532-3p | FP565260.2 |
| hsa-miR-532-3p | FP565260.6 |
| hsa-miR-532-3p | ADARB1 |
| hsa-miR-532-3p | COL18A1 |
| hsa-miR-532-3p | DIP2A |
| hsa-miR-532-3p | TMEM121B |
| hsa-miR-532-3p | MICAL3 |
| hsa-miR-532-3p | DGCR2 |
| hsa-miR-532-3p | ESS2 |
| hsa-miR-532-3p | HIRA |
| hsa-miR-532-3p | C22orf39 |
| hsa-miR-532-3p | RTL10 |
| hsa-miR-532-3p | YPEL1 |
| hsa-miR-532-3p | MAPK1 |
| hsa-miR-532-3p | PPM1F |
| hsa-miR-532-3p | GUCD1 |
| hsa-miR-532-3p | LRRC75B |
| hsa-miR-532-3p | HPS4 |
| hsa-miR-532-3p | PITPNB |
| hsa-miR-532-3p | XBP1 |
| hsa-miR-532-3p | AP1B1 |
| hsa-miR-532-3p | NIPSNAP1 |
| hsa-miR-532-3p | LIF |
| hsa-miR-532-3p | OSM |
| hsa-miR-532-3p | RNF215 |
| hsa-miR-532-3p | PATZ1 |
| hsa-miR-532-3p | PISD |
| hsa-miR-532-3p | RBFOX2 |
| hsa-miR-532-3p | FOXRED2 |
| hsa-miR-532-3p | IL2RB |
| hsa-miR-532-3p | ELFN2 |
| hsa-miR-532-3p | MFNG |
| hsa-miR-532-3p | CARD10 |
| hsa-miR-532-3p | TMEM184B |
| hsa-miR-532-3p | DDX17 |
| hsa-miR-532-3p | FAM227A |
| hsa-miR-532-3p | SUN2 |
| hsa-miR-532-3p | NPTXR |
| hsa-miR-532-3p | CBX6 |
| hsa-miR-532-3p | CBX7 |
| hsa-miR-532-3p | ST13 |
| hsa-miR-532-3p | TOB2 |
| hsa-miR-532-3p | POLR3H |
| hsa-miR-532-3p | DESI1 |
| hsa-miR-532-3p | NAGA |
| hsa-miR-532-3p | TCF20 |
| hsa-miR-532-3p | RRP7A |
| hsa-miR-532-3p | POLDIP3 |
| hsa-miR-532-3p | A4GALT |
| hsa-miR-532-3p | ARFGAP3 |
| hsa-miR-532-3p | MCAT |
| hsa-miR-532-3p | TTLL12 |
| hsa-miR-532-3p | SHISAL1 |
| hsa-miR-532-3p | CDPF1 |
| hsa-miR-532-3p | CELSR1 |
| hsa-miR-532-3p | CERK |
| hsa-miR-532-3p | BRD1 |
| hsa-miR-532-3p | PLXNB2 |
| hsa-miR-532-3p | RABL2B |
| hsa-miR-532-3p | IL17RA |
| hsa-miR-532-3p | CECR2 |
| hsa-miR-532-3p | PEX26 |
| hsa-miR-532-3p | ZDHHC8 |
| hsa-miR-532-3p | ZNF74 |
| hsa-miR-532-3p | CRKL |
| hsa-miR-532-3p | HIC2 |
| hsa-miR-532-3p | PPIL2 |
| hsa-miR-532-3p | SLC2A11 |
| hsa-miR-532-3p | AP000350.4 |
| hsa-miR-532-3p | CABIN1 |
| hsa-miR-532-3p | SPECC1L |
| hsa-miR-532-3p | SNRPD3 |
| hsa-miR-532-3p | GRK3 |
| hsa-miR-532-3p | HSCB |
| hsa-miR-532-3p | CCDC117 |
| hsa-miR-532-3p | KREMEN1 |
| hsa-miR-532-3p | GAS2L1 |
| hsa-miR-532-3p | NF2 |
| hsa-miR-532-3p | MTMR3 |
| hsa-miR-532-3p | LIMK2 |
| hsa-miR-532-3p | DEPDC5 |
| hsa-miR-532-3p | TIMP3 |
| hsa-miR-532-3p | HMGXB4 |
| hsa-miR-532-3p | APOL6 |
| hsa-miR-532-3p | CDC42EP1 |
| hsa-miR-532-3p | PDXP |
| hsa-miR-532-3p | Z83844.3 |
| hsa-miR-532-3p | H1F0 |
| hsa-miR-532-3p | MICALL1 |
| hsa-miR-532-3p | PICK1 |
| hsa-miR-532-3p | MAFF |
| hsa-miR-532-3p | CBY1 |
| hsa-miR-532-3p | TOMM22 |
| hsa-miR-532-3p | MGAT3 |
| hsa-miR-532-3p | MIEF1 |
| hsa-miR-532-3p | TNRC6B |
| hsa-miR-532-3p | XPNPEP3 |
| hsa-miR-532-3p | EP300 |
| hsa-miR-532-3p | L3MBTL2 |
| hsa-miR-532-3p | ZC3H7B |
| hsa-miR-532-3p | TEF |
| hsa-miR-532-3p | CSDC2 |
| hsa-miR-532-3p | SREBF2 |
| hsa-miR-532-3p | SMDT1 |
| hsa-miR-532-3p | NUP50 |
| hsa-miR-532-3p | FAM118A |
| hsa-miR-532-3p | PPARA |
| hsa-miR-532-3p | GTSE1 |
| hsa-miR-532-3p | PANX2 |
| hsa-miR-532-3p | OXTR |
| hsa-miR-532-3p | ATP2B2 |
| hsa-miR-532-3p | RAF1 |
| hsa-miR-532-3p | RPL32 |
| hsa-miR-532-3p | IQSEC1 |
| hsa-miR-532-3p | MRPS25 |
| hsa-miR-532-3p | RBSN |
| hsa-miR-532-3p | SLC4A7 |
| hsa-miR-532-3p | CMTM6 |
| hsa-miR-532-3p | ACAA1 |
| hsa-miR-532-3p | GORASP1 |
| hsa-miR-532-3p | SEC22C |
| hsa-miR-532-3p | CYP8B1 |
| hsa-miR-532-3p | ZNF445 |
| hsa-miR-532-3p | ZDHHC3 |
| hsa-miR-532-3p | SMARCC1 |
| hsa-miR-532-3p | MAP4 |
| hsa-miR-532-3p | CDC25A |
| hsa-miR-532-3p | NME6 |
| hsa-miR-532-3p | CELSR3 |
| hsa-miR-532-3p | NCKIPSD |
| hsa-miR-532-3p | IP6K2 |
| hsa-miR-532-3p | PRKAR2A |
| hsa-miR-532-3p | USP19 |
| hsa-miR-532-3p | IP6K1 |
| hsa-miR-532-3p | CAMKV |
| hsa-miR-532-3p | HYAL2 |
| hsa-miR-532-3p | TUSC2 |
| hsa-miR-532-3p | ABHD14B |
| hsa-miR-532-3p | WDR82 |
| hsa-miR-532-3p | BAP1 |
| hsa-miR-532-3p | PBRM1 |
| hsa-miR-532-3p | ACTR8 |
| hsa-miR-532-3p | PRICKLE2 |
| hsa-miR-532-3p | MAGI1 |
| hsa-miR-532-3p | SUCLG2 |
| hsa-miR-532-3p | TMF1 |
| hsa-miR-532-3p | FOXP1 |
| hsa-miR-532-3p | RYBP |
| hsa-miR-532-3p | PROS1 |
| hsa-miR-532-3p | CLDND1 |
| hsa-miR-532-3p | TOMM70 |
| hsa-miR-532-3p | CBLB |
| hsa-miR-532-3p | CD47 |
| hsa-miR-532-3p | GCSAM |
| hsa-miR-532-3p | NEPRO |
| hsa-miR-532-3p | SPICE1 |
| hsa-miR-532-3p | NAA50 |
| hsa-miR-532-3p | TMEM39A |
| hsa-miR-532-3p | COX17 |
| hsa-miR-532-3p | GSK3B |
| hsa-miR-532-3p | LRRC58 |
| hsa-miR-532-3p | FSTL1 |
| hsa-miR-532-3p | GOLGB1 |
| hsa-miR-532-3p | HEG1 |
| hsa-miR-532-3p | ZNF148 |
| hsa-miR-532-3p | MGLL |
| hsa-miR-532-3p | RPN1 |
| hsa-miR-532-3p | CNBP |
| hsa-miR-532-3p | PLXND1 |
| hsa-miR-532-3p | TMCC1 |
| hsa-miR-532-3p | AMOTL2 |
| hsa-miR-532-3p | PIK3CB |
| hsa-miR-532-3p | COPB2 |
| hsa-miR-532-3p | HLTF |
| hsa-miR-532-3p | PFN2 |
| hsa-miR-532-3p | SIAH2 |
| hsa-miR-532-3p | DHX36 |
| hsa-miR-532-3p | SLC33A1 |
| hsa-miR-532-3p | SSR3 |
| hsa-miR-532-3p | MECOM |
| hsa-miR-532-3p | PHC3 |
| hsa-miR-532-3p | NCEH1 |
| hsa-miR-532-3p | DNAJC19 |
| hsa-miR-532-3p | LIPH |
| hsa-miR-532-3p | IGF2BP2 |
| hsa-miR-532-3p | MASP1 |
| hsa-miR-532-3p | ATP13A3 |
| hsa-miR-532-3p | LSG1 |
| hsa-miR-532-3p | XXYLT1 |
| hsa-miR-532-3p | PCYT1A |
| hsa-miR-532-3p | UBXN7 |
| hsa-miR-532-3p | RUBCN |
| hsa-miR-532-3p | BHLHE40 |
| hsa-miR-532-3p | ARL8B |
| hsa-miR-532-3p | THUMPD3 |
| hsa-miR-532-3p | SETD5 |
| hsa-miR-532-3p | VHL |
| hsa-miR-532-3p | IRAK2 |
| hsa-miR-532-3p | HRH1 |
| hsa-miR-532-3p | ATG7 |
| hsa-miR-532-3p | TMEM43 |
| hsa-miR-532-3p | SLC6A6 |
| hsa-miR-532-3p | CCDC174 |
| hsa-miR-532-3p | NR2C2 |
| hsa-miR-532-3p | UBE2E1 |
| hsa-miR-532-3p | NR1D2 |
| hsa-miR-532-3p | OXSM |
| hsa-miR-532-3p | ZNF860 |
| hsa-miR-532-3p | TRIM71 |
| hsa-miR-532-3p | CTDSPL |
| hsa-miR-532-3p | MYD88 |
| hsa-miR-532-3p | OXSR1 |
| hsa-miR-532-3p | ACVR2B |
| hsa-miR-532-3p | ZNF621 |
| hsa-miR-532-3p | CTNNB1 |
| hsa-miR-532-3p | SNRK |
| hsa-miR-532-3p | TCAIM |
| hsa-miR-532-3p | ZNF197 |
| hsa-miR-532-3p | LARS2 |
| hsa-miR-532-3p | LIMD1 |
| hsa-miR-532-3p | ARIH2 |
| hsa-miR-532-3p | BSN |
| hsa-miR-532-3p | SEMA3F |
| hsa-miR-532-3p | SLC38A3 |
| hsa-miR-532-3p | SEMA3B |
| hsa-miR-532-3p | MAPKAPK3 |
| hsa-miR-532-3p | NISCH |
| hsa-miR-532-3p | ABHD6 |
| hsa-miR-532-3p | RPP14 |
| hsa-miR-532-3p | HTD2 |
| hsa-miR-532-3p | ATXN7 |
| hsa-miR-532-3p | KBTBD8 |
| hsa-miR-532-3p | CHMP2B |
| hsa-miR-532-3p | ARL13B |
| hsa-miR-532-3p | PCNP |
| hsa-miR-532-3p | NXPE3 |
| hsa-miR-532-3p | NFKBIZ |
| hsa-miR-532-3p | ALCAM |
| hsa-miR-532-3p | ABHD10 |
| hsa-miR-532-3p | QTRT2 |
| hsa-miR-532-3p | DTX3L |
| hsa-miR-532-3p | PARP14 |
| hsa-miR-532-3p | DIRC2 |
| hsa-miR-532-3p | SEC22A |
| hsa-miR-532-3p | PLXNA1 |
| hsa-miR-532-3p | SEC61A1 |
| hsa-miR-532-3p | ACAD9 |
| hsa-miR-532-3p | HMCES |
| hsa-miR-532-3p | NUDT16 |
| hsa-miR-532-3p | CDV3 |
| hsa-miR-532-3p | CEP63 |
| hsa-miR-532-3p | C3orf58 |
| hsa-miR-532-3p | MBNL1 |
| hsa-miR-532-3p | RAP2B |
| hsa-miR-532-3p | MME |
| hsa-miR-532-3p | PPM1L |
| hsa-miR-532-3p | CLDN11 |
| hsa-miR-532-3p | ATP11B |
| hsa-miR-532-3p | KLHL24 |
| hsa-miR-532-3p | YEATS2 |
| hsa-miR-532-3p | DVL3 |
| hsa-miR-532-3p | AP2M1 |
| hsa-miR-532-3p | ABCF3 |
| hsa-miR-532-3p | EEF1AKMT4 |
| hsa-miR-532-3p | PSMD2 |
| hsa-miR-532-3p | FAM131A |
| hsa-miR-532-3p | POLR2H |
| hsa-miR-532-3p | SENP2 |
| hsa-miR-532-3p | ST6GAL1 |
| hsa-miR-532-3p | LPP |
| hsa-miR-532-3p | HES1 |
| hsa-miR-532-3p | FAM43A |
| hsa-miR-532-3p | FBXO45 |
| hsa-miR-532-3p | PIGX |
| hsa-miR-532-3p | SENP5 |
| hsa-miR-532-3p | FYTTD1 |
| hsa-miR-532-3p | LRCH3 |
| hsa-miR-532-3p | GAK |
| hsa-miR-532-3p | TMEM129 |
| hsa-miR-532-3p | LETM1 |
| hsa-miR-532-3p | MXD4 |
| hsa-miR-532-3p | LRPAP1 |
| hsa-miR-532-3p | STX18 |
| hsa-miR-532-3p | WDR1 |
| hsa-miR-532-3p | TAPT1 |
| hsa-miR-532-3p | DCAF16 |
| hsa-miR-532-3p | SEPSECS |
| hsa-miR-532-3p | TLR10 |
| hsa-miR-532-3p | RFC1 |
| hsa-miR-532-3p | USP46 |
| hsa-miR-532-3p | CLOCK |
| hsa-miR-532-3p | CXCL3 |
| hsa-miR-532-3p | RCHY1 |
| hsa-miR-532-3p | G3BP2 |
| hsa-miR-532-3p | NUP54 |
| hsa-miR-532-3p | SCARB2 |
| hsa-miR-532-3p | SCD5 |
| hsa-miR-532-3p | WDFY3 |
| hsa-miR-532-3p | KLHL8 |
| hsa-miR-532-3p | PYURF |
| hsa-miR-532-3p | ADH4 |
| hsa-miR-532-3p | UBE2D3 |
| hsa-miR-532-3p | SLC9B2 |
| hsa-miR-532-3p | PLA2G12A |
| hsa-miR-532-3p | ELOVL6 |
| hsa-miR-532-3p | TIFA |
| hsa-miR-532-3p | PABPC4L |
| hsa-miR-532-3p | SLC7A11 |
| hsa-miR-532-3p | ELF2 |
| hsa-miR-532-3p | SETD7 |
| hsa-miR-532-3p | TBC1D9 |
| hsa-miR-532-3p | INPP4B |
| hsa-miR-532-3p | NR3C2 |
| hsa-miR-532-3p | FGA |
| hsa-miR-532-3p | NAF1 |
| hsa-miR-532-3p | CBR4 |
| hsa-miR-532-3p | SH3RF1 |
| hsa-miR-532-3p | DCTD |
| hsa-miR-532-3p | PDLIM3 |
| hsa-miR-532-3p | ZNF595 |
| hsa-miR-532-3p | PDE6B |
| hsa-miR-532-3p | FGFRL1 |
| hsa-miR-532-3p | FGFR3 |
| hsa-miR-532-3p | NSD2 |
| hsa-miR-532-3p | NAT8L |
| hsa-miR-532-3p | SH3BP2 |
| hsa-miR-532-3p | ADD1 |
| hsa-miR-532-3p | DOK7 |
| hsa-miR-532-3p | EVC |
| hsa-miR-532-3p | TBC1D14 |
| hsa-miR-532-3p | TADA2B |
| hsa-miR-532-3p | MED28 |
| hsa-miR-532-3p | NCAPG |
| hsa-miR-532-3p | PCDH7 |
| hsa-miR-532-3p | KLHL5 |
| hsa-miR-532-3p | NIPAL1 |
| hsa-miR-532-3p | SLAIN2 |
| hsa-miR-532-3p | UTP3 |
| hsa-miR-532-3p | EREG |
| hsa-miR-532-3p | USO1 |
| hsa-miR-532-3p | STBD1 |
| hsa-miR-532-3p | FAM47E-STBD1 |
| hsa-miR-532-3p | AFF1 |
| hsa-miR-532-3p | PKD2 |
| hsa-miR-532-3p | HERC3 |
| hsa-miR-532-3p | METAP1 |
| hsa-miR-532-3p | GSTCD |
| hsa-miR-532-3p | HADH |
| hsa-miR-532-3p | LARP7 |
| hsa-miR-532-3p | METTL14 |
| hsa-miR-532-3p | FGF2 |
| hsa-miR-532-3p | SPRY1 |
| hsa-miR-532-3p | PCDH10 |
| hsa-miR-532-3p | NAA15 |
| hsa-miR-532-3p | GAB1 |
| hsa-miR-532-3p | ARFIP1 |
| hsa-miR-532-3p | FHDC1 |
| hsa-miR-532-3p | TMA16 |
| hsa-miR-532-3p | ZDHHC11B |
| hsa-miR-532-3p | ZDHHC11 |
| hsa-miR-532-3p | BRD9 |
| hsa-miR-532-3p | SLC12A7 |
| hsa-miR-532-3p | CLPTM1L |
| hsa-miR-532-3p | MRPL36 |
| hsa-miR-532-3p | DAP |
| hsa-miR-532-3p | CTNND2 |
| hsa-miR-532-3p | ANKH |
| hsa-miR-532-3p | MTMR12 |
| hsa-miR-532-3p | RAD1 |
| hsa-miR-532-3p | LIFR |
| hsa-miR-532-3p | RICTOR |
| hsa-miR-532-3p | DAB2 |
| hsa-miR-532-3p | PRKAA1 |
| hsa-miR-532-3p | RPL37 |
| hsa-miR-532-3p | MOCS2 |
| hsa-miR-532-3p | ARL15 |
| hsa-miR-532-3p | SLC38A9 |
| hsa-miR-532-3p | IL6ST |
| hsa-miR-532-3p | PDE4D |
| hsa-miR-532-3p | SREK1IP1 |
| hsa-miR-532-3p | MRPS27 |
| hsa-miR-532-3p | LHFPL2 |
| hsa-miR-532-3p | ARSB |
| hsa-miR-532-3p | HOMER1 |
| hsa-miR-532-3p | DHFR |
| hsa-miR-532-3p | RPS23 |
| hsa-miR-532-3p | MEF2C |
| hsa-miR-532-3p | MBLAC2 |
| hsa-miR-532-3p | POU5F2 |
| hsa-miR-532-3p | EPB41L4A |
| hsa-miR-532-3p | REEP5 |
| hsa-miR-532-3p | FEM1C |
| hsa-miR-532-3p | TMED7 |
| hsa-miR-532-3p | RAPGEF6 |
| hsa-miR-532-3p | AC008695.1 |
| hsa-miR-532-3p | 8-Sep |
| hsa-miR-532-3p | AFF4 |
| hsa-miR-532-3p | CDKN2AIPNL |
| hsa-miR-532-3p | H2AFY |
| hsa-miR-532-3p | SPOCK1 |
| hsa-miR-532-3p | HNRNPA0 |
| hsa-miR-532-3p | FAM13B |
| hsa-miR-532-3p | ETF1 |
| hsa-miR-532-3p | MZB1 |
| hsa-miR-532-3p | APBB3 |
| hsa-miR-532-3p | DIAPH1 |
| hsa-miR-532-3p | GNPDA1 |
| hsa-miR-532-3p | SPRY4 |
| hsa-miR-532-3p | NR3C1 |
| hsa-miR-532-3p | YIPF5 |
| hsa-miR-532-3p | LARS |
| hsa-miR-532-3p | DPYSL3 |
| hsa-miR-532-3p | CSNK1A1 |
| hsa-miR-532-3p | PDGFRB |
| hsa-miR-532-3p | DCTN4 |
| hsa-miR-532-3p | ZNF300 |
| hsa-miR-532-3p | TNIP1 |
| hsa-miR-532-3p | SPARC |
| hsa-miR-532-3p | ADAM19 |
| hsa-miR-532-3p | RNF145 |
| hsa-miR-532-3p | CCNJL |
| hsa-miR-532-3p | PANK3 |
| hsa-miR-532-3p | FBXW11 |
| hsa-miR-532-3p | UBTD2 |
| hsa-miR-532-3p | DUSP1 |
| hsa-miR-532-3p | BOD1 |
| hsa-miR-532-3p | KIAA1191 |
| hsa-miR-532-3p | CLTB |
| hsa-miR-532-3p | GRM6 |
| hsa-miR-532-3p | HNRNPH1 |
| hsa-miR-532-3p | MAPK9 |
| hsa-miR-532-3p | MGAT1 |
| hsa-miR-532-3p | SDHA |
| hsa-miR-532-3p | AHRR |
| hsa-miR-532-3p | SRD5A1 |
| hsa-miR-532-3p | PAPD7 |
| hsa-miR-532-3p | 6-Mar |
| hsa-miR-532-3p | OTULIN |
| hsa-miR-532-3p | BASP1 |
| hsa-miR-532-3p | NPR3 |
| hsa-miR-532-3p | TARS |
| hsa-miR-532-3p | IL7R |
| hsa-miR-532-3p | SLC1A3 |
| hsa-miR-532-3p | NIPBL |
| hsa-miR-532-3p | WDR70 |
| hsa-miR-532-3p | OSMR |
| hsa-miR-532-3p | C7 |
| hsa-miR-532-3p | PARP8 |
| hsa-miR-532-3p | ZSWIM6 |
| hsa-miR-532-3p | PPWD1 |
| hsa-miR-532-3p | AC008560.1 |
| hsa-miR-532-3p | NLN |
| hsa-miR-532-3p | SREK1 |
| hsa-miR-532-3p | PIK3R1 |
| hsa-miR-532-3p | SLC30A5 |
| hsa-miR-532-3p | MAP1B |
| hsa-miR-532-3p | TNPO1 |
| hsa-miR-532-3p | BTF3 |
| hsa-miR-532-3p | ARHGEF28 |
| hsa-miR-532-3p | POLK |
| hsa-miR-532-3p | IQGAP2 |
| hsa-miR-532-3p | F2R |
| hsa-miR-532-3p | F2RL1 |
| hsa-miR-532-3p | PAPD4 |
| hsa-miR-532-3p | ATG10 |
| hsa-miR-532-3p | POLR3G |
| hsa-miR-532-3p | NR2F1 |
| hsa-miR-532-3p | ARSK |
| hsa-miR-532-3p | RHOBTB3 |
| hsa-miR-532-3p | CAST |
| hsa-miR-532-3p | PPIP5K2 |
| hsa-miR-532-3p | FER |
| hsa-miR-532-3p | WDR36 |
| hsa-miR-532-3p | APC |
| hsa-miR-532-3p | DCP2 |
| hsa-miR-532-3p | COMMD10 |
| hsa-miR-532-3p | TNFAIP8 |
| hsa-miR-532-3p | SNX24 |
| hsa-miR-532-3p | CDC42SE2 |
| hsa-miR-532-3p | SLC22A5 |
| hsa-miR-532-3p | CAMLG |
| hsa-miR-532-3p | C5orf24 |
| hsa-miR-532-3p | TXNDC15 |
| hsa-miR-532-3p | EGR1 |
| hsa-miR-532-3p | ZMAT2 |
| hsa-miR-532-3p | PCDHA6 |
| hsa-miR-532-3p | PCDHA9 |
| hsa-miR-532-3p | PCDHA8 |
| hsa-miR-532-3p | PCDHA7 |
| hsa-miR-532-3p | PCDHA5 |
| hsa-miR-532-3p | PCDHA4 |
| hsa-miR-532-3p | PCDHA2 |
| hsa-miR-532-3p | PCDHA1 |
| hsa-miR-532-3p | PCDHA13 |
| hsa-miR-532-3p | PCDHAC2 |
| hsa-miR-532-3p | PCDHAC1 |
| hsa-miR-532-3p | PCDHA11 |
| hsa-miR-532-3p | PCDHA10 |
| hsa-miR-532-3p | PCDHA12 |
| hsa-miR-532-3p | PCDHA3 |
| hsa-miR-532-3p | RNF14 |
| hsa-miR-532-3p | NDFIP1 |
| hsa-miR-532-3p | KCTD16 |
| hsa-miR-532-3p | SH3RF2 |
| hsa-miR-532-3p | FBXO38 |
| hsa-miR-532-3p | GRPEL2 |
| hsa-miR-532-3p | SLC26A2 |
| hsa-miR-532-3p | NDST1 |
| hsa-miR-532-3p | SLC36A1 |
| hsa-miR-532-3p | GALNT10 |
| hsa-miR-532-3p | LARP1 |
| hsa-miR-532-3p | LSM11 |
| hsa-miR-532-3p | NEURL1B |
| hsa-miR-532-3p | ERGIC1 |
| hsa-miR-532-3p | BNIP1 |
| hsa-miR-532-3p | CPEB4 |
| hsa-miR-532-3p | CPLX2 |
| hsa-miR-532-3p | TSPAN17 |
| hsa-miR-532-3p | ZNF346 |
| hsa-miR-532-3p | GRK6 |
| hsa-miR-532-3p | N4BP3 |
| hsa-miR-532-3p | HNRNPAB |
| hsa-miR-532-3p | CANX |
| hsa-miR-532-3p | MAML1 |
| hsa-miR-532-3p | PXDC1 |
| hsa-miR-532-3p | LYRM4 |
| hsa-miR-532-3p | SSR1 |
| hsa-miR-532-3p | BLOC1S5 |
| hsa-miR-532-3p | ELOVL2 |
| hsa-miR-532-3p | RANBP9 |
| hsa-miR-532-3p | KIF13A |
| hsa-miR-532-3p | ZNF322 |
| hsa-miR-532-3p | TRIM27 |
| hsa-miR-532-3p | GABBR1 |
| hsa-miR-532-3p | GNL1 |
| hsa-miR-532-3p | PPP1R18 |
| hsa-miR-532-3p | BAK1 |
| hsa-miR-532-3p | LEMD2 |
| hsa-miR-532-3p | NUDT3 |
| hsa-miR-532-3p | C6orf106 |
| hsa-miR-532-3p | TEAD3 |
| hsa-miR-532-3p | STK38 |
| hsa-miR-532-3p | MTCH1 |
| hsa-miR-532-3p | BTBD9 |
| hsa-miR-532-3p | KCNK5 |
| hsa-miR-532-3p | C6orf132 |
| hsa-miR-532-3p | PEX6 |
| hsa-miR-532-3p | DNPH1 |
| hsa-miR-532-3p | XPO5 |
| hsa-miR-532-3p | MRPS18A |
| hsa-miR-532-3p | MRPL14 |
| hsa-miR-532-3p | AARS2 |
| hsa-miR-532-3p | MCM3 |
| hsa-miR-532-3p | TRAM2 |
| hsa-miR-532-3p | DST |
| hsa-miR-532-3p | LMBRD1 |
| hsa-miR-532-3p | EEF1A1 |
| hsa-miR-532-3p | FAM46A |
| hsa-miR-532-3p | IBTK |
| hsa-miR-532-3p | RNGTT |
| hsa-miR-532-3p | LYRM2 |
| hsa-miR-532-3p | MDN1 |
| hsa-miR-532-3p | BACH2 |
| hsa-miR-532-3p | BEND3 |
| hsa-miR-532-3p | CD164 |
| hsa-miR-532-3p | CDK19 |
| hsa-miR-532-3p | HDAC2 |
| hsa-miR-532-3p | TSPYL1 |
| hsa-miR-532-3p | SERINC1 |
| hsa-miR-532-3p | KIAA0408 |
| hsa-miR-532-3p | AL096711.2 |
| hsa-miR-532-3p | PTPRK |
| hsa-miR-532-3p | CTGF |
| hsa-miR-532-3p | PERP |
| hsa-miR-532-3p | HIVEP2 |
| hsa-miR-532-3p | ADAT2 |
| hsa-miR-532-3p | PLAGL1 |
| hsa-miR-532-3p | SF3B5 |
| hsa-miR-532-3p | LATS1 |
| hsa-miR-532-3p | LRP11 |
| hsa-miR-532-3p | RMND1 |
| hsa-miR-532-3p | IPCEF1 |
| hsa-miR-532-3p | EZR |
| hsa-miR-532-3p | SOD2 |
| hsa-miR-532-3p | RPS6KA2 |
| hsa-miR-532-3p | THBS2 |
| hsa-miR-532-3p | IRF4 |
| hsa-miR-532-3p | FOXF2 |
| hsa-miR-532-3p | BPHL |
| hsa-miR-532-3p | PSMG4 |
| hsa-miR-532-3p | RREB1 |
| hsa-miR-532-3p | SNRNP48 |
| hsa-miR-532-3p | SMIM13 |
| hsa-miR-532-3p | TMEM170B |
| hsa-miR-532-3p | CD83 |
| hsa-miR-532-3p | JARID2 |
| hsa-miR-532-3p | FAM8A1 |
| hsa-miR-532-3p | ID4 |
| hsa-miR-532-3p | E2F3 |
| hsa-miR-532-3p | ABT1 |
| hsa-miR-532-3p | ZKSCAN8 |
| hsa-miR-532-3p | ZSCAN26 |
| hsa-miR-532-3p | PRR3 |
| hsa-miR-532-3p | C6orf136 |
| hsa-miR-532-3p | DDR1 |
| hsa-miR-532-3p | NFKBIL1 |
| hsa-miR-532-3p | SLC39A7 |
| hsa-miR-532-3p | HMGA1 |
| hsa-miR-532-3p | UHRF1BP1 |
| hsa-miR-532-3p | ANKS1A |
| hsa-miR-532-3p | PPARD |
| hsa-miR-532-3p | MAPK14 |
| hsa-miR-532-3p | KCTD20 |
| hsa-miR-532-3p | CDKN1A |
| hsa-miR-532-3p | PIM1 |
| hsa-miR-532-3p | RNF8 |
| hsa-miR-532-3p | CMTR1 |
| hsa-miR-532-3p | ZFAND3 |
| hsa-miR-532-3p | NFYA |
| hsa-miR-532-3p | FOXP4 |
| hsa-miR-532-3p | AL365205.1 |
| hsa-miR-532-3p | TOMM6 |
| hsa-miR-532-3p | TAF8 |
| hsa-miR-532-3p | RPL7L1 |
| hsa-miR-532-3p | KLHDC3 |
| hsa-miR-532-3p | PTK7 |
| hsa-miR-532-3p | SRF |
| hsa-miR-532-3p | POLH |
| hsa-miR-532-3p | VEGFA |
| hsa-miR-532-3p | C6orf223 |
| hsa-miR-532-3p | TMEM63B |
| hsa-miR-532-3p | CDC5L |
| hsa-miR-532-3p | C6orf141 |
| hsa-miR-532-3p | FBXO9 |
| hsa-miR-532-3p | PTP4A1 |
| hsa-miR-532-3p | PHF3 |
| hsa-miR-532-3p | CD109 |
| hsa-miR-532-3p | SENP6 |
| hsa-miR-532-3p | MYO6 |
| hsa-miR-532-3p | PRSS35 |
| hsa-miR-532-3p | NT5E |
| hsa-miR-532-3p | GRIK2 |
| hsa-miR-532-3p | FOXO3 |
| hsa-miR-532-3p | CDC40 |
| hsa-miR-532-3p | SLC16A10 |
| hsa-miR-532-3p | KPNA5 |
| hsa-miR-532-3p | RNF146 |
| hsa-miR-532-3p | EYA4 |
| hsa-miR-532-3p | MYB |
| hsa-miR-532-3p | PDE7B |
| hsa-miR-532-3p | VTA1 |
| hsa-miR-532-3p | ADGRG6 |
| hsa-miR-532-3p | PHACTR2 |
| hsa-miR-532-3p | RAB32 |
| hsa-miR-532-3p | STXBP5 |
| hsa-miR-532-3p | SASH1 |
| hsa-miR-532-3p | UST |
| hsa-miR-532-3p | PPP1R14C |
| hsa-miR-532-3p | CCDC170 |
| hsa-miR-532-3p | ESR1 |
| hsa-miR-532-3p | ARID1B |
| hsa-miR-532-3p | SYNJ2 |
| hsa-miR-532-3p | TULP4 |
| hsa-miR-532-3p | TMEM181 |
| hsa-miR-532-3p | WTAP |
| hsa-miR-532-3p | QKI |
| hsa-miR-532-3p | CCR6 |
| hsa-miR-532-3p | C6orf120 |
| hsa-miR-532-3p | COX19 |
| hsa-miR-532-3p | C7orf50 |
| hsa-miR-532-3p | TMEM184A |
| hsa-miR-532-3p | MRM2 |
| hsa-miR-532-3p | GNA12 |
| hsa-miR-532-3p | ACTB |
| hsa-miR-532-3p | RNF216 |
| hsa-miR-532-3p | CYTH3 |
| hsa-miR-532-3p | ETV1 |
| hsa-miR-532-3p | SNX13 |
| hsa-miR-532-3p | MACC1 |
| hsa-miR-532-3p | SKAP2 |
| hsa-miR-532-3p | HOXA11 |
| hsa-miR-532-3p | HIBADH |
| hsa-miR-532-3p | SCRN1 |
| hsa-miR-532-3p | FKBP14 |
| hsa-miR-532-3p | DPY19L1 |
| hsa-miR-532-3p | URGCP |
| hsa-miR-532-3p | NUDCD3 |
| hsa-miR-532-3p | H2AFV |
| hsa-miR-532-3p | PURB |
| hsa-miR-532-3p | IGFBP3 |
| hsa-miR-532-3p | HUS1 |
| hsa-miR-532-3p | COBL |
| hsa-miR-532-3p | VOPP1 |
| hsa-miR-532-3p | ZNF680 |
| hsa-miR-532-3p | BAZ1B |
| hsa-miR-532-3p | TBL2 |
| hsa-miR-532-3p | ABHD11 |
| hsa-miR-532-3p | RFC2 |
| hsa-miR-532-3p | POM121C |
| hsa-miR-532-3p | HIP1 |
| hsa-miR-532-3p | TMEM120A |
| hsa-miR-532-3p | STYXL1 |
| hsa-miR-532-3p | YWHAG |
| hsa-miR-532-3p | SEMA3C |
| hsa-miR-532-3p | CACNA2D1 |
| hsa-miR-532-3p | SEMA3A |
| hsa-miR-532-3p | SLC25A40 |
| hsa-miR-532-3p | SRI |
| hsa-miR-532-3p | CYP51A1 |
| hsa-miR-532-3p | KRIT1 |
| hsa-miR-532-3p | FAM133B |
| hsa-miR-532-3p | BET1 |
| hsa-miR-532-3p | PDK4 |
| hsa-miR-532-3p | SMURF1 |
| hsa-miR-532-3p | PDAP1 |
| hsa-miR-532-3p | CYP3A4 |
| hsa-miR-532-3p | TRIM4 |
| hsa-miR-532-3p | ZNF3 |
| hsa-miR-532-3p | TSC22D4 |
| hsa-miR-532-3p | GIGYF1 |
| hsa-miR-532-3p | ACHE |
| hsa-miR-532-3p | PLOD3 |
| hsa-miR-532-3p | ALKBH4 |
| hsa-miR-532-3p | NAPEPLD |
| hsa-miR-532-3p | SRPK2 |
| hsa-miR-532-3p | PUS7 |
| hsa-miR-532-3p | SYPL1 |
| hsa-miR-532-3p | COG5 |
| hsa-miR-532-3p | LAMB1 |
| hsa-miR-532-3p | NRCAM |
| hsa-miR-532-3p | IMMP2L |
| hsa-miR-532-3p | FAM3C |
| hsa-miR-532-3p | GCC1 |
| hsa-miR-532-3p | PRRT4 |
| hsa-miR-532-3p | IMPDH1 |
| hsa-miR-532-3p | PODXL |
| hsa-miR-532-3p | PLXNA4 |
| hsa-miR-532-3p | SLC35B4 |
| hsa-miR-532-3p | C7orf49 |
| hsa-miR-532-3p | CREB3L2 |
| hsa-miR-532-3p | ZC3HAV1 |
| hsa-miR-532-3p | HIPK2 |
| hsa-miR-532-3p | PARP12 |
| hsa-miR-532-3p | KDM7A |
| hsa-miR-532-3p | KIAA1147 |
| hsa-miR-532-3p | PDIA4 |
| hsa-miR-532-3p | GIMAP6 |
| hsa-miR-532-3p | TMUB1 |
| hsa-miR-532-3p | KMT2C |
| hsa-miR-532-3p | LMBR1 |
| hsa-miR-532-3p | SUN1 |
| hsa-miR-532-3p | CYP2W1 |
| hsa-miR-532-3p | MAFK |
| hsa-miR-532-3p | LFNG |
| hsa-miR-532-3p | IQCE |
| hsa-miR-532-3p | TTYH3 |
| hsa-miR-532-3p | AMZ1 |
| hsa-miR-532-3p | FOXK1 |
| hsa-miR-532-3p | WIPI2 |
| hsa-miR-532-3p | FSCN1 |
| hsa-miR-532-3p | GLCCI1 |
| hsa-miR-532-3p | GPNMB |
| hsa-miR-532-3p | MTURN |
| hsa-miR-532-3p | RALA |
| hsa-miR-532-3p | DBNL |
| hsa-miR-532-3p | AEBP1 |
| hsa-miR-532-3p | YKT6 |
| hsa-miR-532-3p | ZMIZ2 |
| hsa-miR-532-3p | NIPSNAP2 |
| hsa-miR-532-3p | SUMF2 |
| hsa-miR-532-3p | ZNF107 |
| hsa-miR-532-3p | ZNF273 |
| hsa-miR-532-3p | VKORC1L1 |
| hsa-miR-532-3p | CRCP |
| hsa-miR-532-3p | KCTD7 |
| hsa-miR-532-3p | TYW1 |
| hsa-miR-532-3p | POM121 |
| hsa-miR-532-3p | BUD23 |
| hsa-miR-532-3p | CLDN4 |
| hsa-miR-532-3p | LIMK1 |
| hsa-miR-532-3p | EIF4H |
| hsa-miR-532-3p | SRRM3 |
| hsa-miR-532-3p | PHTF2 |
| hsa-miR-532-3p | DMTF1 |
| hsa-miR-532-3p | CROT |
| hsa-miR-532-3p | CLDN12 |
| hsa-miR-532-3p | AKAP9 |
| hsa-miR-532-3p | GATAD1 |
| hsa-miR-532-3p | PEG10 |
| hsa-miR-532-3p | PPP1R9A |
| hsa-miR-532-3p | DLX6 |
| hsa-miR-532-3p | LMTK2 |
| hsa-miR-532-3p | BUD31 |
| hsa-miR-532-3p | CPSF4 |
| hsa-miR-532-3p | ZNF789 |
| hsa-miR-532-3p | ZKSCAN1 |
| hsa-miR-532-3p | MEPCE |
| hsa-miR-532-3p | TRIM56 |
| hsa-miR-532-3p | SERPINE1 |
| hsa-miR-532-3p | AP1S1 |
| hsa-miR-532-3p | CUX1 |
| hsa-miR-532-3p | ORAI2 |
| hsa-miR-532-3p | ARMC10 |
| hsa-miR-532-3p | PRKAR2B |
| hsa-miR-532-3p | DUS4L |
| hsa-miR-532-3p | DLD |
| hsa-miR-532-3p | LSMEM1 |
| hsa-miR-532-3p | FOXP2 |
| hsa-miR-532-3p | TES |
| hsa-miR-532-3p | CAV2 |
| hsa-miR-532-3p | MET |
| hsa-miR-532-3p | LSM8 |
| hsa-miR-532-3p | ARF5 |
| hsa-miR-532-3p | HILPDA |
| hsa-miR-532-3p | METTL2B |
| hsa-miR-532-3p | CALU |
| hsa-miR-532-3p | KLHDC10 |
| hsa-miR-532-3p | CPA4 |
| hsa-miR-532-3p | MKLN1 |
| hsa-miR-532-3p | BPGM |
| hsa-miR-532-3p | UBN2 |
| hsa-miR-532-3p | TMEM178B |
| hsa-miR-532-3p | GSTK1 |
| hsa-miR-532-3p | ZYX |
| hsa-miR-532-3p | ARHGEF5 |
| hsa-miR-532-3p | ZNF398 |
| hsa-miR-532-3p | ZNF282 |
| hsa-miR-532-3p | ZNF212 |
| hsa-miR-532-3p | ZNF783 |
| hsa-miR-532-3p | LRRC61 |
| hsa-miR-532-3p | REPIN1 |
| hsa-miR-532-3p | NUB1 |
| hsa-miR-532-3p | EN2 |
| hsa-miR-532-3p | RBM33 |
| hsa-miR-532-3p | NOM1 |
| hsa-miR-532-3p | UBE3C |
| hsa-miR-532-3p | DNAJB6 |
| hsa-miR-532-3p | ERICH1 |
| hsa-miR-532-3p | PPP1R3B |
| hsa-miR-532-3p | FAM167A |
| hsa-miR-532-3p | CTSB |
| hsa-miR-532-3p | CNOT7 |
| hsa-miR-532-3p | MTUS1 |
| hsa-miR-532-3p | PSD3 |
| hsa-miR-532-3p | CSGALNACT1 |
| hsa-miR-532-3p | BIN3 |
| hsa-miR-532-3p | EGR3 |
| hsa-miR-532-3p | TNFRSF10D |
| hsa-miR-532-3p | TNFRSF10A |
| hsa-miR-532-3p | ENTPD4 |
| hsa-miR-532-3p | NKX3-1 |
| hsa-miR-532-3p | STC1 |
| hsa-miR-532-3p | TRIM35 |
| hsa-miR-532-3p | ZNF395 |
| hsa-miR-532-3p | KIF13B |
| hsa-miR-532-3p | DUSP4 |
| hsa-miR-532-3p | GTF2E2 |
| hsa-miR-532-3p | PPP2CB |
| hsa-miR-532-3p | RAB11FIP1 |
| hsa-miR-532-3p | FGFR1 |
| hsa-miR-532-3p | KAT6A |
| hsa-miR-532-3p | SLC20A2 |
| hsa-miR-532-3p | PRKDC |
| hsa-miR-532-3p | ATP6V1H |
| hsa-miR-532-3p | PLAG1 |
| hsa-miR-532-3p | PDE7A |
| hsa-miR-532-3p | NCOA2 |
| hsa-miR-532-3p | JPH1 |
| hsa-miR-532-3p | MMP16 |
| hsa-miR-532-3p | PIP4P2 |
| hsa-miR-532-3p | TRIQK |
| hsa-miR-532-3p | RBM12B |
| hsa-miR-532-3p | CCNE2 |
| hsa-miR-532-3p | TP53INP1 |
| hsa-miR-532-3p | YWHAZ |
| hsa-miR-532-3p | NCALD |
| hsa-miR-532-3p | RRM2B |
| hsa-miR-532-3p | AZIN1 |
| hsa-miR-532-3p | TRPS1 |
| hsa-miR-532-3p | EXT1 |
| hsa-miR-532-3p | ZHX1 |
| hsa-miR-532-3p | MTSS1 |
| hsa-miR-532-3p | FAM84B |
| hsa-miR-532-3p | SLA |
| hsa-miR-532-3p | NDRG1 |
| hsa-miR-532-3p | SLC45A4 |
| hsa-miR-532-3p | JRK |
| hsa-miR-532-3p | PYCR3 |
| hsa-miR-532-3p | TSTA3 |
| hsa-miR-532-3p | FAM83H |
| hsa-miR-532-3p | NRBP2 |
| hsa-miR-532-3p | ZNF596 |
| hsa-miR-532-3p | DLGAP2 |
| hsa-miR-532-3p | CLN8 |
| hsa-miR-532-3p | AGPAT5 |
| hsa-miR-532-3p | MTMR9 |
| hsa-miR-532-3p | ZDHHC2 |
| hsa-miR-532-3p | SLC7A2 |
| hsa-miR-532-3p | XPO7 |
| hsa-miR-532-3p | FAM160B2 |
| hsa-miR-532-3p | BMP1 |
| hsa-miR-532-3p | SLC39A14 |
| hsa-miR-532-3p | PDLIM2 |
| hsa-miR-532-3p | CCAR2 |
| hsa-miR-532-3p | RHOBTB2 |
| hsa-miR-532-3p | SCARA3 |
| hsa-miR-532-3p | EXTL3 |
| hsa-miR-532-3p | MAK16 |
| hsa-miR-532-3p | UNC5D |
| hsa-miR-532-3p | AC012215.1 |
| hsa-miR-532-3p | ERLIN2 |
| hsa-miR-532-3p | PLPBP |
| hsa-miR-532-3p | EIF4EBP1 |
| hsa-miR-532-3p | TACC1 |
| hsa-miR-532-3p | PLEKHA2 |
| hsa-miR-532-3p | GOLGA7 |
| hsa-miR-532-3p | GINS4 |
| hsa-miR-532-3p | IKBKB |
| hsa-miR-532-3p | MCM4 |
| hsa-miR-532-3p | CHD7 |
| hsa-miR-532-3p | MTFR1 |
| hsa-miR-532-3p | SGK3 |
| hsa-miR-532-3p | GDAP1 |
| hsa-miR-532-3p | PI15 |
| hsa-miR-532-3p | ZFHX4 |
| hsa-miR-532-3p | CHMP4C |
| hsa-miR-532-3p | SDC2 |
| hsa-miR-532-3p | LAPTM4B |
| hsa-miR-532-3p | GRHL2 |
| hsa-miR-532-3p | FZD6 |
| hsa-miR-532-3p | ZHX2 |
| hsa-miR-532-3p | TRMT12 |
| hsa-miR-532-3p | TRIB1 |
| hsa-miR-532-3p | PHF20L1 |
| hsa-miR-532-3p | ADGRB1 |
| hsa-miR-532-3p | LY6K |
| hsa-miR-532-3p | LY6E |
| hsa-miR-532-3p | ZNF696 |
| hsa-miR-532-3p | RHPN1 |
| hsa-miR-532-3p | ZNF707 |
| hsa-miR-532-3p | MAF1 |
| hsa-miR-532-3p | LRRC14 |
| hsa-miR-532-3p | ERMP1 |
| hsa-miR-532-3p | RANBP6 |
| hsa-miR-532-3p | PTPRD |
| hsa-miR-532-3p | NFIB |
| hsa-miR-532-3p | TAF1L |
| hsa-miR-532-3p | SMU1 |
| hsa-miR-532-3p | B4GALT1 |
| hsa-miR-532-3p | BAG1 |
| hsa-miR-532-3p | AQP3 |
| hsa-miR-532-3p | NOL6 |
| hsa-miR-532-3p | UBAP2 |
| hsa-miR-532-3p | DCAF12 |
| hsa-miR-532-3p | FAM219A |
| hsa-miR-532-3p | TPM2 |
| hsa-miR-532-3p | GBA2 |
| hsa-miR-532-3p | ZBTB5 |
| hsa-miR-532-3p | EXOSC3 |
| hsa-miR-532-3p | FAM95C |
| hsa-miR-532-3p | PTAR1 |
| hsa-miR-532-3p | KLF9 |
| hsa-miR-532-3p | C9orf64 |
| hsa-miR-532-3p | ROR2 |
| hsa-miR-532-3p | SPTLC1 |
| hsa-miR-532-3p | IARS |
| hsa-miR-532-3p | BICD2 |
| hsa-miR-532-3p | FANCC |
| hsa-miR-532-3p | CDC14B |
| hsa-miR-532-3p | TSTD2 |
| hsa-miR-532-3p | TRIM14 |
| hsa-miR-532-3p | ANKS6 |
| hsa-miR-532-3p | ERP44 |
| hsa-miR-532-3p | TMEM245 |
| hsa-miR-532-3p | PTPN3 |
| hsa-miR-532-3p | PTBP3 |
| hsa-miR-532-3p | FKBP15 |
| hsa-miR-532-3p | POLE3 |
| hsa-miR-532-3p | TNC |
| hsa-miR-532-3p | MEGF9 |
| hsa-miR-532-3p | PHF19 |
| hsa-miR-532-3p | STOM |
| hsa-miR-532-3p | RC3H2 |
| hsa-miR-532-3p | ZBTB6 |
| hsa-miR-532-3p | DENND1A |
| hsa-miR-532-3p | GOLGA1 |
| hsa-miR-532-3p | ANGPTL2 |
| hsa-miR-532-3p | FAM129B |
| hsa-miR-532-3p | SH2D3C |
| hsa-miR-532-3p | ENG |
| hsa-miR-532-3p | AK1 |
| hsa-miR-532-3p | FAM102A |
| hsa-miR-532-3p | NAIF1 |
| hsa-miR-532-3p | GOLGA2 |
| hsa-miR-532-3p | SPOUT1 |
| hsa-miR-532-3p | SH3GLB2 |
| hsa-miR-532-3p | PTGES |
| hsa-miR-532-3p | TOR1A |
| hsa-miR-532-3p | FNBP1 |
| hsa-miR-532-3p | UCK1 |
| hsa-miR-532-3p | RAPGEF1 |
| hsa-miR-532-3p | DDX31 |
| hsa-miR-532-3p | MED22 |
| hsa-miR-532-3p | SURF4 |
| hsa-miR-532-3p | SLC2A6 |
| hsa-miR-532-3p | VAV2 |
| hsa-miR-532-3p | CAMSAP1 |
| hsa-miR-532-3p | TMEM250 |
| hsa-miR-532-3p | QSOX2 |
| hsa-miR-532-3p | SDCCAG3 |
| hsa-miR-532-3p | SEC16A |
| hsa-miR-532-3p | NOTCH1 |
| hsa-miR-532-3p | AGPAT2 |
| hsa-miR-532-3p | ABCA2 |
| hsa-miR-532-3p | PLPP6 |
| hsa-miR-532-3p | CDC37L1 |
| hsa-miR-532-3p | MTAP |
| hsa-miR-532-3p | ACO1 |
| hsa-miR-532-3p | UBE2R2 |
| hsa-miR-532-3p | POLR1E |
| hsa-miR-532-3p | DCAF10 |
| hsa-miR-532-3p | ALDH1B1 |
| hsa-miR-532-3p | FAM122A |
| hsa-miR-532-3p | MAMDC2 |
| hsa-miR-532-3p | RORB |
| hsa-miR-532-3p | CEP78 |
| hsa-miR-532-3p | TLE4 |
| hsa-miR-532-3p | CTSL |
| hsa-miR-532-3p | S1PR3 |
| hsa-miR-532-3p | CENPP |
| hsa-miR-532-3p | PHF2 |
| hsa-miR-532-3p | MFSD14B |
| hsa-miR-532-3p | TGFBR1 |
| hsa-miR-532-3p | ZNF189 |
| hsa-miR-532-3p | SMC2 |
| hsa-miR-532-3p | ZNF462 |
| hsa-miR-532-3p | RAD23B |
| hsa-miR-532-3p | PALM2-AKAP2 |
| hsa-miR-532-3p | AKAP2 |
| hsa-miR-532-3p | GNG10 |
| hsa-miR-532-3p | DNAJC25-GNG10 |
| hsa-miR-532-3p | HSDL2 |
| hsa-miR-532-3p | SNX30 |
| hsa-miR-532-3p | SLC31A1 |
| hsa-miR-532-3p | PRPF4 |
| hsa-miR-532-3p | RGS3 |
| hsa-miR-532-3p | ZNF618 |
| hsa-miR-532-3p | COL27A1 |
| hsa-miR-532-3p | PAPPA |
| hsa-miR-532-3p | CNTRL |
| hsa-miR-532-3p | CRB2 |
| hsa-miR-532-3p | NEK6 |
| hsa-miR-532-3p | ZBTB43 |
| hsa-miR-532-3p | CDK9 |
| hsa-miR-532-3p | FPGS |
| hsa-miR-532-3p | SLC25A25 |
| hsa-miR-532-3p | SLC27A4 |
| hsa-miR-532-3p | GLE1 |
| hsa-miR-532-3p | SET |
| hsa-miR-532-3p | TBC1D13 |
| hsa-miR-532-3p | LRRC8A |
| hsa-miR-532-3p | MIGA2 |
| hsa-miR-532-3p | DOLPP1 |
| hsa-miR-532-3p | PTPA |
| hsa-miR-532-3p | TOR1B |
| hsa-miR-532-3p | GPR107 |
| hsa-miR-532-3p | NCS1 |
| hsa-miR-532-3p | FUBP3 |
| hsa-miR-532-3p | ABL1 |
| hsa-miR-532-3p | PRRC2B |
| hsa-miR-532-3p | ADAMTS13 |
| hsa-miR-532-3p | CACFD1 |
| hsa-miR-532-3p | WDR5 |
| hsa-miR-532-3p | COL5A1 |
| hsa-miR-532-3p | MRPS2 |
| hsa-miR-532-3p | GPSM1 |
| hsa-miR-532-3p | RABL6 |
| hsa-miR-532-3p | TRAF2 |
| hsa-miR-532-3p | UAP1L1 |
| hsa-miR-532-3p | NDOR1 |
| hsa-miR-532-3p | BX255925.3 |
| hsa-miR-532-3p | ARSD |
| hsa-miR-532-3p | PRKX |
| hsa-miR-532-3p | TRAPPC2 |
| hsa-miR-532-3p | BCLAF3 |
| hsa-miR-532-3p | KLHL15 |
| hsa-miR-532-3p | MED14 |
| hsa-miR-532-3p | CASK |
| hsa-miR-532-3p | CXorf36 |
| hsa-miR-532-3p | ELK1 |
| hsa-miR-532-3p | TIMM17B |
| hsa-miR-532-3p | OTUD5 |
| hsa-miR-532-3p | HSD17B10 |
| hsa-miR-532-3p | PHF8 |
| hsa-miR-532-3p | FGD1 |
| hsa-miR-532-3p | AMER1 |
| hsa-miR-532-3p | LAS1L |
| hsa-miR-532-3p | OPHN1 |
| hsa-miR-532-3p | PDZD11 |
| hsa-miR-532-3p | PHKA1 |
| hsa-miR-532-3p | MAGT1 |
| hsa-miR-532-3p | TSC22D3 |
| hsa-miR-532-3p | ACSL4 |
| hsa-miR-532-3p | AMMECR1 |
| hsa-miR-532-3p | LAMP2 |
| hsa-miR-532-3p | THOC2 |
| hsa-miR-532-3p | APLN |
| hsa-miR-532-3p | MAP7D3 |
| hsa-miR-532-3p | RBMX |
| hsa-miR-532-3p | IDS |
| hsa-miR-532-3p | CCNQ |
| hsa-miR-532-3p | L1CAM |
| hsa-miR-532-3p | HCFC1 |
| hsa-miR-532-3p | IRAK1 |
| hsa-miR-532-3p | MECP2 |
| hsa-miR-532-3p | FLNA |
| hsa-miR-532-3p | FAM3A |
| hsa-miR-532-3p | WWC3 |
| hsa-miR-532-3p | PRPS2 |
| hsa-miR-532-3p | RAB9A |
| hsa-miR-532-3p | REPS2 |
| hsa-miR-532-3p | ZFX |
| hsa-miR-532-3p | MAGEB10 |
| hsa-miR-532-3p | MID1IP1 |
| hsa-miR-532-3p | KRBOX4 |
| hsa-miR-532-3p | JADE3 |
| hsa-miR-532-3p | CDK16 |
| hsa-miR-532-3p | ARAF |
| hsa-miR-532-3p | ZNF81 |
| hsa-miR-532-3p | EBP |
| hsa-miR-532-3p | RBM3 |
| hsa-miR-532-3p | MAGIX |
| hsa-miR-532-3p | PLP2 |
| hsa-miR-532-3p | PPP1R3F |
| hsa-miR-532-3p | CLCN5 |
| hsa-miR-532-3p | GNL3L |
| hsa-miR-532-3p | MSN |
| hsa-miR-532-3p | YIPF6 |
| hsa-miR-532-3p | EFNB1 |
| hsa-miR-532-3p | FAM155B |
| hsa-miR-532-3p | KIF4A |
| hsa-miR-532-3p | ZNF711 |
| hsa-miR-532-3p | HNRNPH2 |
| hsa-miR-532-3p | PRPS1 |
| hsa-miR-532-3p | TMEM164 |
| hsa-miR-532-3p | IL13RA1 |
| hsa-miR-532-3p | UBE2A |
| hsa-miR-532-3p | ZBTB33 |
| hsa-miR-532-3p | XIAP |
| hsa-miR-532-3p | BCORL1 |
| hsa-miR-532-3p | PHF6 |
| hsa-miR-532-3p | MAMLD1 |
| hsa-miR-532-3p | MTMR1 |
| hsa-miR-532-3p | HMGB3 |
| hsa-miR-532-3p | ZNF275 |
| hsa-miR-532-3p | BGN |
| hsa-miR-532-3p | ATP6AP1 |
| hsa-miR-532-3p | GDI1 |
| hsa-miR-532-3p | FAM50A |
| hsa-miR-532-3p | DKC1 |

| **Table S6** The commonly upregulated genes in GSE130779 dataset. | | |
| --- | --- | --- |
| GeneSymbol | P.Value | logFC |
| CST2 | 0.000283 | 2.91387083 |
| LOC400965 | 0.000333 | 1.58201833 |
| SFRP5 | 0.000655 | 3.14363093 |
| KRTAP9-4 | 0.00171 | 1.85123844 |
| SPP1 | 0.0018 | 2.78042527 |
| IGF2BP3 | 0.00264 | 2.15759562 |
| ABAT | 0.00318 | 1.26685789 |
| LBH | 0.00329 | 1.21214654 |
| PYCR1 | 0.00367 | 2.19727658 |
| GABRP | 0.00386 | 2.50553669 |
| WFDC2 | 0.00394 | 2.37632456 |
| LOC100129516 | 0.00433 | 1.26023114 |
| NHLRC1 | 0.00446 | 2.50987524 |
| UMODL1 | 0.00459 | 2.09113125 |
| SCUBE1 | 0.00467 | 1.03945024 |
| ARHGAP40 | 0.00483 | 2.07770557 |
| GCNT3 | 0.00513 | 2.58547236 |
| TTLL10 | 0.00583 | 1.51453449 |
| LTBP3 | 0.00684 | 2.28086397 |
| PABPC1L | 0.00724 | 2.41865154 |
| B3GNTL1 | 0.00738 | 2.27235574 |
| COL8A2 | 0.00744 | 1.68989532 |
| CXCL14 | 0.00786 | 1.87309445 |
| SLC12A8 | 0.00882 | 1.51537474 |
| TARM1 | 0.00928 | 1.54081587 |
| ADAMTSL1 | 0.0103 | 1.05490211 |
| TTLL8 | 0.0104 | 2.11512321 |
| ODF3L2 | 0.0116 | 1.73967154 |
| NR1I3 | 0.0116 | 1.4187198 |
| IMP5 | 0.0119 | 1.46924798 |
| ABCC3 | 0.0142 | 2.98124411 |
| LBX2 | 0.0145 | 1.51652322 |
| RNH1 | 0.015 | 2.29989721 |
| CORIN | 0.0155 | 1.26997815 |
| GTSE1 | 0.0165 | 1.72405361 |
| CEBPE | 0.0175 | 1.36933373 |
| HTRA4 | 0.0199 | 1.50241187 |
| H1FNT | 0.0202 | 1.36271712 |
| LRRC31 | 0.0207 | 2.25161932 |
| NHS | 0.0211 | 2.16757661 |
| MYO7A | 0.0218 | 2.35546473 |
| GPR110 | 0.0228 | 2.43754537 |
| XLOC_006040 | 0.0238 | 1.99380064 |
| RAD54L2 | 0.0239 | 1.13876343 |
| GPATCH4 | 0.0243 | 1.35327865 |
| KLK4 | 0.0243 | 1.32038349 |
| NMUR1 | 0.0252 | 1.25237574 |
| CEACAM1 | 0.0253 | 1.59435918 |
| TMEM52 | 0.027 | 1.22224548 |
| BSX | 0.0273 | 1.29863263 |
| TRABD | 0.0274 | 1.55745204 |
| AZGP1 | 0.0278 | 1.82289932 |
| SGK110 | 0.0283 | 1.56364007 |
| ERN2 | 0.0284 | 2.15091575 |
| TFB1M | 0.0285 | 1.07673945 |
| MAGIX | 0.0287 | 1.14839812 |
| C17orf53 | 0.0289 | 1.36126331 |
| FKBP4 | 0.0289 | 1.03177066 |
| CD79A | 0.0292 | 1.16228068 |
| POF1B | 0.0296 | 1.13514285 |
| LUC7L | 0.0299 | 1.84264177 |
| XLOC_014073 | 0.0301 | 1.00655324 |
| GBP5 | 0.0302 | 1.14944091 |
| KIF1A | 0.0303 | 1.54097355 |
| LOC388796 | 0.0304 | 1.56868806 |
| PITX1 | 0.0305 | 1.58603008 |
| CEACAM3 | 0.0309 | 1.54175836 |
| COL10A1 | 0.0309 | 1.25598299 |
| CITED1 | 0.0311 | 1.74667536 |
| B4GALNT4 | 0.0311 | 1.41008442 |
| LOC100129186 | 0.0314 | 2.36976438 |
| NR0B1 | 0.032 | 1.55369958 |
| ZNF497 | 0.0325 | 1.96646309 |
| GALE | 0.0329 | 1.793934 |
| ISLR | 0.0333 | 1.38328991 |
| CELF5 | 0.0335 | 1.13056773 |
| MKI67 | 0.0346 | 1.86933436 |
| SCN8A | 0.035 | 1.60516877 |
| CCDC96 | 0.0352 | 1.36487345 |
| MMP11 | 0.0356 | 1.13225855 |
| SNAR-B1 | 0.0359 | 1.35448456 |
| Q442D3 | 0.036 | 1.27902976 |
| IBSP | 0.0361 | 1.95779979 |
| XLOC_010477 | 0.0373 | 1.62775161 |
| WTH3DI | 0.0379 | 1.05855068 |
| SLC45A2 | 0.0384 | 1.55348825 |
| CLSPN | 0.0384 | 1.32042832 |
| ARNTL2 | 0.0391 | 1.33242752 |
| LOC100132874 | 0.0395 | 1.66182988 |
| CEACAM3 | 0.0399 | 1.44021702 |
| FAM47A | 0.04 | 1.73813522 |
| LOC100129069 | 0.0406 | 1.13411459 |
| LOC100653515 | 0.0416 | 1.48643013 |
| C6orf25 | 0.0417 | 1.08587841 |
| TUBB3 | 0.0425 | 1.63506732 |
| MFI2 | 0.0428 | 1.35255118 |
| SNORA65 | 0.0432 | 1.40945402 |
| ANKRD17 | 0.0439 | 1.78758151 |
| EBPL | 0.0441 | 1.18688568 |
| HIST2H2BE | 0.0446 | 1.29870367 |
| TAC4 | 0.0452 | 1.4385839 |
| AGR2 | 0.0465 | 1.3800917 |
| PLAU | 0.0473 | 2.39868486 |
| IL24 | 0.0478 | 1.21359045 |
| PRSS45 | 0.0479 | 1.43041004 |
| SPAG5 | 0.0491 | 1.44922404 |
| RP1L1 | 0.0494 | 1.10917619 |
| MAD1L1 | 0.0497 | 1.2011738 |
